# Supplementary material for: Transcriptome Analysis During Follicle Development in Turkey Hens With Low and High Egg Production
Source: Front Genet. 2021 Mar 18;12:619196. doi: 10.3389/fgene.2021.619196 (PMC8012691; doi:10.3389/fgene.2021.619196)
Supplement: Supplementary Additional File 4 — Small white follicle (SWF) differential expression between low egg producing hens and high egg producing hens. [file Table_4.xls]

## Sheet: High vs. Low SWF Basal
Name	Chromosome	Region	Max group mean	Log₂ fold change	Fold change	P-value	FDR p-value	Bonferroni	ENSEMBL
gene:ENSMGAG00000008190	Z	70331362..70332681	62.9404	2.72473	6.61036	4.24549e-13	5.99591e-09	5.99591e-09	ENSMGAG00000008190
gene:ENSMGAG00000003544	19	4893394..4894812	15.6958	7.01312	129.169	1.10744e-11	7.82016e-08	1.56403e-07	ENSMGAG00000003544
VSIG1	9	complement(13829604..14025704)	6.49267	-4.17153	-18.0201	4.33269e-11	2.03969e-07	6.11906e-07	ENSMGAG00000006860
AKAP6	5	36295240..36399446	0.618937	-3.49632	-11.2849	2.64051e-10	7.86404e-07	3.7292e-06	ENSMGAG00000017059
gene:ENSMGAG00000009849	16	13940035..13949658	1.07233	4.21221	18.5354	2.78413e-10	7.86404e-07	3.93202e-06	ENSMGAG00000009849
gene:ENSMGAG00000007266	17	complement(8248270..8248605)	125.584	3.10553	8.60711	5.83234e-09	1.37284e-05	8.23701e-05	ENSMGAG00000007266
SLC40A1	7	complement(7525018..7536368)	27.2354	-1.73495	-3.32868	5.89483e-08	0.000118932	0.000832527	ENSMGAG00000006127
gene:ENSMGAG00000016665	17	8297194..8323540	86.6175	2.25034	4.75794	9.33805e-08	0.000164852	0.00131881	ENSMGAG00000016665
MMP13	1	190175381..190183459	18.5201	4.57643	23.8585	2.19092e-07	0.000343805	0.00309424	ENSMGAG00000015169
PLAU	8	complement(18156597..18163111)	70.1154	4.09988	17.147	8.08131e-07	0.00114132	0.0114132	ENSMGAG00000006225
gene:ENSMGAG00000004787	GL425131.1	35..567	833.028	2.12192	4.35273	9.31885e-07	0.00119646	0.013161	ENSMGAG00000004787
gene:ENSMGAG00000016774	Z	70320992..70321621	39.4772	2.18168	4.5368	1.02497e-06	0.00120631	0.0144757	ENSMGAG00000016774
gene:ENSMGAG00000016931	GL429037.1	246..768	63.4361	2.0015	4.00415	1.18307e-06	0.00128527	0.0167086	ENSMGAG00000016931
JCHAIN	4	complement(31914370..31918907)	386.863	1.95609	3.88009	5.39316e-06	0.00544054	0.0761676	ENSMGAG00000009989
gene:ENSMGAG00000007265	17	8296540..8297399	178.976	2.30336	4.93606	7.01143e-06	0.0066015	0.0990224	ENSMGAG00000007265
gene:ENSMGAG00000001594	GL426472.1	766..1131	107.565	2.10671	4.30709	9.6926e-06	0.00813828	0.136889	ENSMGAG00000001594
gene:ENSMGAG00000007241	17	complement(8259688..8316786)	807.002	1.87456	3.6669	9.79614e-06	0.00813828	0.138351	ENSMGAG00000007241
gene:ENSMGAG00000008572	13	complement(19071606..19076463)	31.6029	-1.43733	-2.70819	1.12701e-05	0.00884266	0.159168	ENSMGAG00000008572
USH2A	2	20567845..20947768	0.093214	3.91829	15.119	1.60577e-05	0.0119359	0.226783	ENSMGAG00000009443
LRG1	30	complement(2101963..2103348)	9.16561	-1.61256	-3.05795	2.46605e-05	0.0167795	0.34828	ENSMGAG00000002886
BMPER	6	complement(48536503..48705726)	9.14211	2.19762	4.58723	2.49501e-05	0.0167795	0.35237	ENSMGAG00000012062
SELE	10	complement(5773956..5784211)	41.7651	2.10313	4.29641	3.04222e-05	0.0195297	0.429653	ENSMGAG00000003778
gene:ENSMGAG00000016045	GL424909.1	21513..21875	42.8787	2.55543	5.87843	3.20474e-05	0.0196785	0.452605	ENSMGAG00000016045
gene:ENSMGAG00000016647	Z	complement(29941684..29942004)	57.9498	1.87126	3.65852	3.61649e-05	0.0212816	0.510758	ENSMGAG00000016647
gene:ENSMGAG00000008185	Z	complement(70330637..70331917)	119.485	1.79547	3.47127	4.78238e-05	0.0270166	0.675415	ENSMGAG00000008185
gene:ENSMGAG00000015851	3	complement(71954625..71954906)	3.54039	2.88362	7.37998	5.04085e-05	0.0273815	0.711919	ENSMGAG00000015851
PAF1	3	complement(100296648..100298895)	11.252	-1.9426	-3.84397	5.8869e-05	0.0307928	0.831407	ENSMGAG00000012267
gene:ENSMGAG00000007905	GL427315.1	793..1147	7.50232	2.68422	6.42735	7.72166e-05	0.0389475	1	ENSMGAG00000007905
gene:ENSMGAG00000012010	2	complement(40915383..40916584)	162.62	1.4323	2.69876	9.06038e-05	0.0441241	1	ENSMGAG00000012010
LYVE1	5	8593678..8598966	4.54287	2.64802	6.26807	0.000107708	0.0507051	1	ENSMGAG00000005964
MMRN1	4	16096343..16123126	0.234275	2.57743	5.96875	0.000113131	0.0515401	1	ENSMGAG00000005507
gene:ENSMGAG00000017272	2	40914107..40914863	162.811	1.38758	2.61639	0.000126934	0.0560216	1	ENSMGAG00000017272
gene:ENSMGAG00000016370	GL424262.1	1614..1991	85.6126	2.11584	4.33443	0.000143769	0.0615286	1	ENSMGAG00000016370
FHL2	1	complement(142368688..142408355)	60.5408	1.25018	2.37871	0.000199216	0.0827506	1	ENSMGAG00000014821
LMCD1	14	20127522..20137681	15.049	1.34282	2.53647	0.00023716	0.0950853	1	ENSMGAG00000010109
SMPX	1	126309239..126352540	0.514718	5.16686	35.9237	0.000242376	0.0950853	1	ENSMGAG00000014659
NGFR	29	complement(2634861..2722332)	8.51234	-1.63927	-3.11508	0.000304167	0.113792	1	ENSMGAG00000002136
gene:ENSMGAG00000000846	30	complement(426031..427190)	12.0181	1.85574	3.61938	0.000306173	0.113792	1	ENSMGAG00000000846
RGS16	10	complement(5242959..5248863)	3.65486	2.57229	5.94751	0.000314433	0.113865	1	ENSMGAG00000003350
gene:ENSMGAG00000009257	1	complement(29368173..29370362)	0.340002	3.29428	9.81017	0.000335272	0.118376	1	ENSMGAG00000009257
KIF26B	2	complement(34924469..34984823)	0.374314	2.41948	5.34978	0.000376063	0.12954	1	ENSMGAG00000011412
PHF24	Z	8655972..8657612	26.2367	1.06753	2.09584	0.000405769	0.136445	1	ENSMGAG00000002475
gene:ENSMGAG00000016188	GL425284.1	complement(1055..1357)	3.44758	2.21124	4.63073	0.000421875	0.137855	1	ENSMGAG00000016188
gene:ENSMGAG00000006432	8	18469259..18498173	16.5503	-0.979987	-1.97245	0.000429484	0.137855	1	ENSMGAG00000006432
CHRNB4	12	2930889..2942946	0.171811	3.72556	13.2283	0.000481274	0.151045	1	ENSMGAG00000003559
VWF	1	complement(78334022..78447882)	0.982733	1.42852	2.69171	0.000521943	0.157267	1	ENSMGAG00000013898
LMOD1	28	1178228..1190624	2.39256	1.72448	3.3046	0.000523369	0.157267	1	ENSMGAG00000005415
NET1	1	complement(1247563..1271706)	46.0546	-0.931171	-1.90682	0.000648762	0.184084	1	ENSMGAG00000003502
TAGLN	26	5534214..5535109	338.206	1.27023	2.41201	0.00065135	0.184084	1	ENSMGAG00000003326
CRYBG1	2	complement(70584740..70619212)	2.00565	-1.39339	-2.62695	0.000651717	0.184084	1	ENSMGAG00000013520
LRP4	5	24056137..24094597	1.6328	-1.52545	-2.87877	0.000698651	0.190087	1	ENSMGAG00000010850
gene:ENSMGAG00000002331	24	2562080..2572552	0.414632	2.15668	4.45887	0.000703522	0.190087	1	ENSMGAG00000002331
MMP11	17	8364459..8373778	3.11077	1.82036	3.53169	0.000713349	0.190087	1	ENSMGAG00000007320
PTX3	11	complement(22929128..22934042)	1.52437	1.77774	3.4289	0.000791394	0.206531	1	ENSMGAG00000010676
PDZRN4	1	30159651..30178579	0.5284	2.19032	4.56408	0.000804307	0.206531	1	ENSMGAG00000009406
NOTCH2	10	complement(6738903..6808703)	11.2803	-1.10171	-2.14609	0.000837835	0.211299	1	ENSMGAG00000004604
TMC3	12	11970897..11988731	0.248336	2.12789	4.37077	0.000882631	0.218691	1	ENSMGAG00000008021
RASL12	12	17816219..17819614	0.442949	2.77892	6.86341	0.00090139	0.219489	1	ENSMGAG00000009547
EYA2	22	6083911..6158497	0.166482	-3.09356	-8.53601	0.000965064	0.229505	1	ENSMGAG00000004218
PDLIM4	15	16653758..16675722	15.6191	1.28939	2.44425	0.000980695	0.229505	1	ENSMGAG00000008855
gene:ENSMGAG00000008803	16	12629075..12629931	2375.71	1.40069	2.64028	0.000991276	0.229505	1	ENSMGAG00000008803
CRISPLD2	13	16955265..16973920	32.5849	1.18353	2.27133	0.00104922	0.238914	1	ENSMGAG00000007172
IGFBP4	29	complement(3970994..3971655)	10.5866	1.27928	2.42718	0.00106575	0.238914	1	ENSMGAG00000002851
gene:ENSMGAG00000005909	28	4289912..4297463	0.36342	3.10896	8.62763	0.00111887	0.246904	1	ENSMGAG00000005909
gene:ENSMGAG00000001593	GL424262.1	complement(919..1268)	37.1441	1.65543	3.15018	0.0011525	0.249133	1	ENSMGAG00000001593
gene:ENSMGAG00000004485	GL424909.1	complement(1158..1716)	73.9559	1.69882	3.24635	0.00116425	0.249133	1	ENSMGAG00000004485
gene:ENSMGAG00000000629	18	22852..25499	17.1173	-1.38545	-2.61253	0.00119246	0.251359	1	ENSMGAG00000000629
CDO1	Z	77305586..77311921	33.6802	-1.58123	-2.99225	0.00130492	0.27102	1	ENSMGAG00000008903
gene:ENSMGAG00000000956	14	171502..174904	2.93811	1.84187	3.58475	0.00162594	0.332799	1	ENSMGAG00000000956
PDLIM7	15	complement(9770372..9785429)	34.5261	0.873145	1.83165	0.00179716	0.36259	1	ENSMGAG00000003746
gene:ENSMGAG00000014576	1	115212022..115229567	2.78509	1.72471	3.30515	0.00196644	0.391155	1	ENSMGAG00000014576
KLHDC7A	23	complement(9326..23079)	0.690524	-1.72373	-3.3029	0.00202689	0.397581	1	ENSMGAG00000000704
CACNG3	16	7054059..7056126	0.807502	2.18089	4.53432	0.002086	0.40357	1	ENSMGAG00000006416
HSPB7	23	4525573..4527283	2.98739	1.45024	2.73254	0.00213922	0.408273	1	ENSMGAG00000005124
SPIRE2	13	18933296..18936982	0.675503	1.83116	3.55822	0.00219269	0.412898	1	ENSMGAG00000008320
MELTF	11	complement(12313593..12331099)	4.74781	-1.28669	-2.43967	0.00237344	0.437984	1	ENSMGAG00000006732
CHRNA3	12	2948618..2953921	0.162388	3.24488	9.47998	0.00238793	0.437984	1	ENSMGAG00000003578
gene:ENSMGAG00000014946	1	complement(161280529..161281642)	14.7252	1.34131	2.53382	0.00243829	0.441487	1	ENSMGAG00000014946
CFAP61	2	complement(3850035..3961550)	0.188609	-1.82664	-3.5471	0.00268366	0.479763	1	ENSMGAG00000003401
ZNF804B	6	21557168..21582795	0.0833069	-4.39289	-21.0083	0.00273238	0.482367	1	ENSMGAG00000008467
CLUL1	3	complement(51430347..51439760)	0.142284	4.79307	27.7241	0.00285494	0.497781	1	ENSMGAG00000009793
ESAM	26	288668..290439	11.8402	1.0369	2.05182	0.00291082	0.501336	1	ENSMGAG00000000818
gene:ENSMGAG00000016369	2	complement(35025947..35132258)	1.25897	2.25841	4.78462	0.00297811	0.501516	1	ENSMGAG00000016369
RAMP2	29	4641113..4643390	27.8931	1.00629	2.00874	0.00298289	0.501516	1	ENSMGAG00000004095
TCIM	24	2592319..2593463	112.471	0.936356	1.91369	0.0031157	0.513232	1	ENSMGAG00000002295
CERS2	GL425832.1	complement(2909..3887)	9.13626	1.24637	2.37244	0.00319896	0.513232	1	ENSMGAG00000006564
gene:ENSMGAG00000001048	GL425405.1	complement(107..3331)	2.05501	1.53856	2.90504	0.00321232	0.513232	1	ENSMGAG00000001048
NOS2	21	complement(9606356..9622710)	5.97306	-1.03368	-2.04723	0.00324084	0.513232	1	ENSMGAG00000008503
PIKFYVE	7	14069314..14128932	2.28944	-0.982384	-1.97573	0.00329549	0.513232	1	ENSMGAG00000008939
CSRP3	5	4766380..4775117	0.530548	3.70261	13.0196	0.00331459	0.513232	1	ENSMGAG00000002327
gene:ENSMGAG00000008823	16	12632771..12633561	20269.9	1.25211	2.38189	0.00333219	0.513232	1	ENSMGAG00000008823
gene:ENSMGAG00000017132	Z	complement(66370184..66399785)	0.650587	1.54382	2.91566	0.0033433	0.513232	1	ENSMGAG00000017132
TRPC3	4	35831444..35863127	5.10203	-1.24494	-2.37008	0.00351675	0.534054	1	ENSMGAG00000010636
gene:ENSMGAG00000016562	1	190210524..190230710	40.859	1.12152	2.17576	0.00358702	0.534074	1	ENSMGAG00000016562
ACTG2	1	complement(8314825..8316726)	507.162	1.16195	2.2376	0.00360819	0.534074	1	ENSMGAG00000004889
ABCC5	11	complement(15718250..15754110)	15.9414	-0.775518	-1.71181	0.00370533	0.534074	1	ENSMGAG00000008822
gene:ENSMGAG00000014945	1	complement(161277148..161278662)	11470.8	1.20816	2.31043	0.00370922	0.534074	1	ENSMGAG00000014945
ANKRD50	4	34820161..34854994	2.26413	-1.01111	-2.01546	0.00374258	0.534074	1	ENSMGAG00000010546
gene:ENSMGAG00000014486	1	complement(106288874..106360003)	0.525073	1.79424	3.46834	0.00374378	0.534074	1	ENSMGAG00000014486
CA3	3	73143700..73332479	192.536	1.24596	2.37177	0.00382634	0.537457	1	ENSMGAG00000011714
DACT2	2	42889597..42896299	0.73907	-1.60446	-3.04082	0.0038436	0.537457	1	ENSMGAG00000012264
ADCY2	3	complement(28287151..28472296)	0.446202	1.9875	3.96548	0.0039513	0.544739	1	ENSMGAG00000006274
KCNMB1	15	3233432..3240524	24.1939	1.24466	2.36963	0.00397282	0.544739	1	ENSMGAG00000001918
SUSD4	2	17670606..17700142	0.74459	1.55602	2.94042	0.00401962	0.545857	1	ENSMGAG00000008854
CLTCL1	17	complement(59806..98899)	19.3175	-1.03491	-2.04899	0.00422705	0.567565	1	ENSMGAG00000000798
gene:ENSMGAG00000014678	1	complement(128223400..128226768)	0.780154	-2.51118	-5.70087	0.00426235	0.567565	1	ENSMGAG00000014678
FOXJ2	1	complement(79234113..79243590)	4.09818	-1.1412	-2.20564	0.00430004	0.567565	1	ENSMGAG00000013934
gene:ENSMGAG00000009997	GL429607.1	483..3813	5.54681	1.13292	2.19303	0.00436818	0.57122	1	ENSMGAG00000009997
PRKG2	4	26713584..26732965	1.0081	-1.27303	-2.41668	0.00441703	0.57231	1	ENSMGAG00000007424
C8G	19	complement(410858..413105)	25.8095	0.967427	1.95535	0.00449018	0.576499	1	ENSMGAG00000000833
gene:ENSMGAG00000005804	GL425441.1	2..1084	179.911	1.80951	3.50523	0.00461323	0.583276	1	ENSMGAG00000005804
gene:ENSMGAG00000007751	22	complement(11292540..11299752)	252.051	-1.13835	-2.20129	0.00462557	0.583276	1	ENSMGAG00000007751
gene:ENSMGAG00000009488	20	10928776..10958362	5.28074	-1.09528	-2.13654	0.00469583	0.586895	1	ENSMGAG00000009488
PIK3C2A	5	complement(11574887..11612235)	8.12594	-0.925452	-1.89928	0.00478911	0.590438	1	ENSMGAG00000006883
DNAJB2	7	complement(23571065..23574769)	25.4449	0.9772	1.96864	0.00480778	0.590438	1	ENSMGAG00000011332
PCDH15	8	3299963..3585866	0.486768	-1.15984	-2.23433	0.00487744	0.593828	1	ENSMGAG00000001461
CSRP1	28	806516..811528	101.669	0.795259	1.73539	0.0051907	0.622173	1	ENSMGAG00000002016
ITGA8	6	20509707..20622750	3.17704	1.22344	2.33503	0.00521175	0.622173	1	ENSMGAG00000007885
gene:ENSMGAG00000001528	29	2330613..2331145	130.719	0.89553	1.86029	0.00525145	0.622173	1	ENSMGAG00000001528
KLHDC8B	14	complement(12092934..12095093)	1.75574	1.31391	2.48614	0.00539945	0.622173	1	ENSMGAG00000008466
SNCG	8	complement(5381430..5389280)	2.38971	-1.39065	-2.62198	0.0054131	0.622173	1	ENSMGAG00000002416
SPON2	4	68858167..68863879	69.6752	-0.90131	-1.86776	0.00541438	0.622173	1	ENSMGAG00000013099
CLCN6	23	complement(5812171..5826468)	4.33294	-1.05687	-2.08042	0.00545263	0.622173	1	ENSMGAG00000006244
gene:ENSMGAG00000014565	1	114661060..114678332	0.861615	1.80348	3.49061	0.00546269	0.622173	1	ENSMGAG00000014565
MC2R	3	45903849..45904793	0.409254	-7.66757	-203.315	0.00551942	0.623606	1	ENSMGAG00000015820
gene:ENSMGAG00000011608	3	complement(70788782..70794994)	0.324038	2.73866	6.67451	0.00566526	0.635004	1	ENSMGAG00000011608
gene:ENSMGAG00000002657	GL424551.1	complement(5..1978)	4.34541	1.24636	2.37242	0.00577291	0.641974	1	ENSMGAG00000002657
ANGPT2	2	92998931..93043083	23.0856	0.777135	1.71372	0.00583307	0.64252	1	ENSMGAG00000013948
P4HA3	1	complement(203554921..203559782)	1.50514	1.33205	2.5176	0.0058688	0.64252	1	ENSMGAG00000015311
ESRRB	5	40297340..40333446	0.378626	1.90719	3.75079	0.0060046	0.652331	1	ENSMGAG00000012804
KCNK3	2	complement(110687794..110688678)	0.260862	6.82918	113.707	0.00605736	0.653039	1	ENSMGAG00000017098
SCNN1B	16	complement(7261176..7269498)	2.06818	-1.24052	-2.36283	0.00622338	0.665607	1	ENSMGAG00000006682
GRIK1	1	complement(109771019..109842168)	0.450743	1.98253	3.95186	0.0062682	0.665607	1	ENSMGAG00000014509
EGF	4	complement(40147349..40198712)	0.358336	-1.42396	-2.68321	0.00636575	0.670921	1	ENSMGAG00000011026
gene:ENSMGAG00000001234	21	278093..282121	0.59842	1.79617	3.47298	0.00644031	0.673752	1	ENSMGAG00000001234
TFPI	7	complement(6708350..6732297)	5.62788	1.57788	2.9853	0.006593	0.680413	1	ENSMGAG00000004644
FAM83F	1	51117696..51131799	0.15442	3.58469	11.9977	0.00660034	0.680413	1	ENSMGAG00000012348
EPS8L2	5	6100057..6126857	4.01155	1.03763	2.05285	0.00689162	0.702263	1	ENSMGAG00000003800
TNNC2	22	complement(11373806..11375586)	10.1883	1.133	2.19314	0.00700347	0.702263	1	ENSMGAG00000008072
gene:ENSMGAG00000003663	20	3327576..3350434	11.9733	-0.817663	-1.76255	0.00700405	0.702263	1	ENSMGAG00000003663
UNC5D	24	1948754..1990121	0.30746	1.56586	2.96055	0.00708426	0.702263	1	ENSMGAG00000001823
VPS18	5	25014217..25022531	25.2753	-0.747495	-1.67888	0.00714005	0.702263	1	ENSMGAG00000011138
ATP6V1B2	24	complement(1638474..1643125)	161.078	-0.8406	-1.7908	0.0071807	0.702263	1	ENSMGAG00000001709
WDR47	10	9906292..9921668	20.0488	-0.813856	-1.7579	0.00718747	0.702263	1	ENSMGAG00000006050
CLIC6	1	complement(110811982..110816384)	0.590442	-2.1029	-4.29572	0.00721009	0.702263	1	ENSMGAG00000014535
SFRP4	6	47127101..47134796	20.7298	1.40347	2.64538	0.00734378	0.702462	1	ENSMGAG00000011966
ADRB1	8	30233716..30238545	5.55837	1.35735	2.56214	0.00734943	0.702462	1	ENSMGAG00000011048
gene:ENSMGAG00000010202	11	complement(19879451..19888666)	2.54712	1.3898	2.62043	0.00736136	0.702462	1	ENSMGAG00000010202
VCAM1	10	11278843..11284846	5.27499	1.63686	3.10987	0.00761035	0.708897	1	ENSMGAG00000006885
ADAM8	8	4747184..4754831	18.1773	1.31843	2.49395	0.00764421	0.708897	1	ENSMGAG00000001910
CDH5	13	complement(11462825..11490694)	5.23456	0.977459	1.96899	0.00785485	0.708897	1	ENSMGAG00000006440
gene:ENSMGAG00000012559	2	48138369..48204625	0.734537	-1.32539	-2.50601	0.00785931	0.708897	1	ENSMGAG00000012559
ESPN	GL426026.1	820..7282	0.118176	2.42776	5.38059	0.00787634	0.708897	1	ENSMGAG00000007003
DOPEY1	2	81243154..81296563	4.92571	-0.775541	-1.71183	0.00789565	0.708897	1	ENSMGAG00000013741
GPR20	3	complement(97283568..97284608)	1.4752	1.88252	3.6872	0.00798762	0.708897	1	ENSMGAG00000015881
GYG2	1	complement(135996640..136006659)	4.40145	-1.31839	-2.49388	0.00799449	0.708897	1	ENSMGAG00000014734
TRIM23	Z	complement(22457468..22465601)	4.25468	-0.909572	-1.87849	0.00806821	0.708897	1	ENSMGAG00000004378
LYZ	1	37178362..37182125	4.99312	-1.45465	-2.7409	0.00815564	0.708897	1	ENSMGAG00000010559
TNNC1	GL427306.1	37..5155	2.64462	1.51982	2.86754	0.00820312	0.708897	1	ENSMGAG00000001184
SOAT1	10	4596155..4609931	68.3268	-0.878181	-1.83806	0.0082775	0.708897	1	ENSMGAG00000002615
MYL3	6	complement(2921769..2957614)	0.169211	3.6366	12.4373	0.00828926	0.708897	1	ENSMGAG00000002731
gene:ENSMGAG00000003841	6	complement(4458200..4479342)	0.0278813	-2.44988	-5.4637	0.0083988	0.708897	1	ENSMGAG00000003841
EIF4ENIF1	17	9381517..9418283	42.1834	-0.848662	-1.80083	0.00846566	0.708897	1	ENSMGAG00000008355
CLTC	21	7601763..7624064	89.9432	-0.850554	-1.80319	0.00847887	0.708897	1	ENSMGAG00000007276
gene:ENSMGAG00000008917	22	12063499..12076538	5.59572	-0.894282	-1.85868	0.00848928	0.708897	1	ENSMGAG00000008917
TMEM61	10	26078994..26081018	1.9316	1.84106	3.58272	0.00850548	0.708897	1	ENSMGAG00000011430
gene:ENSMGAG00000017066	GL425788.1	complement(471..551)	8.70787	1.63658	3.10928	0.00851945	0.708897	1	ENSMGAG00000017066
STXBP5	2	48376443..48446690	17.0782	-0.800327	-1.7415	0.00860102	0.708897	1	ENSMGAG00000012565
EVC	4	62569289..62617769	8.88847	0.880796	1.84139	0.00862093	0.708897	1	ENSMGAG00000012734
gene:ENSMGAG00000004695	19	5511890..5536758	24.901	-0.826815	-1.77377	0.00862977	0.708897	1	ENSMGAG00000004695
gene:ENSMGAG00000016626	14	11871491..11892700	1.14494	-1.0727	-2.10336	0.00863568	0.708897	1	ENSMGAG00000016626
KERA	1	complement(44743011..44751457)	0.211199	2.02722	4.07618	0.00863712	0.708897	1	ENSMGAG00000011304
XK	1	complement(120448503..120453326)	5.14743	-1.04197	-2.05904	0.00871096	0.708897	1	ENSMGAG00000014624
gene:ENSMGAG00000015202	1	193818462..193826232	0.186612	-2.2269	-4.68126	0.00873385	0.708897	1	ENSMGAG00000015202
gene:ENSMGAG00000008623	Z	70669852..70709294	17.7945	0.956653	1.9408	0.00881411	0.711324	1	ENSMGAG00000008623
gene:ENSMGAG00000009658	GL429030.1	1..1180	19.0187	1.27896	2.42664	0.00898122	0.720692	1	ENSMGAG00000009658
gene:ENSMGAG00000006587	8	18765697..18819048	2.79807	-0.87556	-1.83472	0.00904847	0.721986	1	ENSMGAG00000006587
RAB32	2	48099438..48117985	66.922	-0.59008	-1.50533	0.00917629	0.727253	1	ENSMGAG00000012555
CDHR2	15	complement(9956854..9964454)	1.05029	-1.28493	-2.43671	0.00921746	0.727253	1	ENSMGAG00000004631
gene:ENSMGAG00000013935	2	92748944..92757185	19.061	1.01314	2.01831	0.00939035	0.736777	1	ENSMGAG00000013935
OPN3	2	36495057..36498107	3.93595	-1.06158	-2.08722	0.00945811	0.737994	1	ENSMGAG00000011545
SYNJ2	2	53240882..53296895	7.25152	-0.876257	-1.83561	0.0095575	0.741651	1	ENSMGAG00000012839
PHOSPHO1	29	2886193..2887913	13.3902	0.86674	1.82354	0.00961974	0.742402	1	ENSMGAG00000002447
TGIF1	3	complement(50203196..50210926)	19.2823	-1.23467	-2.35327	0.00981017	0.752984	1	ENSMGAG00000009588
CEP170B	5	53899231..53951195	3.19534	-0.865403	-1.82185	0.009898	0.753849	1	ENSMGAG00000013455
BRINP2	10	3990900..3996082	0.407742	1.35701	2.56154	0.0099282	0.753849	1	ENSMGAG00000002422
gene:ENSMGAG00000014329	1	complement(86942043..86949156)	1.03234	-1.69723	-3.24277	0.0101365	0.764459	1	ENSMGAG00000014329
gene:ENSMGAG00000015409	20	complement(4050553..4051179)	0.354942	2.64847	6.27003	0.0102351	0.764459	1	ENSMGAG00000015409
gene:ENSMGAG00000001668	GL427096.1	complement(1796..7077)	5.05084	1.10315	2.14822	0.0102672	0.764459	1	ENSMGAG00000001668
gene:ENSMGAG00000003049	19	complement(2654337..2697211)	4.38001	1.06014	2.08513	0.0102844	0.764459	1	ENSMGAG00000003049
gene:ENSMGAG00000015170	1	190239728..190245901	10.6511	1.46855	2.76744	0.0105656	0.776193	1	ENSMGAG00000015170
gene:ENSMGAG00000005716	GL425414.1	complement(1400..5284)	2.27063	1.16408	2.2409	0.0105676	0.776193	1	ENSMGAG00000005716
gene:ENSMGAG00000002518	12	1728427..1731687	10.4893	-0.99024	-1.98651	0.0106465	0.776193	1	ENSMGAG00000002518
gene:ENSMGAG00000004395	28	3138510..3143061	4.19548	1.16662	2.24485	0.0106621	0.776193	1	ENSMGAG00000004395
HAPLN2	GL428182.1	complement(26908..28243)	0.131013	4.17397	18.0506	0.0109206	0.78838	1	ENSMGAG00000008723
FLT4	15	13110554..13138620	3.05581	-1.03251	-2.04559	0.0109412	0.78838	1	ENSMGAG00000006995
CCK	6	complement(44742935..44747606)	5.34709	1.2697	2.41111	0.0111382	0.7985	1	ENSMGAG00000011731
TMPRSS7	1	92851710..92883071	0.241241	-1.7993	-3.48052	0.0113578	0.80301	1	ENSMGAG00000014400
RC3H2	19	complement(8718011..8733966)	5.17517	-0.768733	-1.70377	0.0113654	0.80301	1	ENSMGAG00000007984
ANKFY1	21	3410337..3438346	14.2942	-0.818837	-1.76398	0.011403	0.80301	1	ENSMGAG00000002751
GREM2	2	36883796..36884302	1.64557	2.07348	4.209	0.0114372	0.80301	1	ENSMGAG00000015834
MEGF10	Z	59717666..59761363	9.35217	-0.946917	-1.92775	0.0115485	0.80301	1	ENSMGAG00000007922
gene:ENSMGAG00000005892	9	complement(12042462..12058219)	15.8408	-0.795793	-1.73603	0.0116863	0.80301	1	ENSMGAG00000005892
TCF25	13	18938474..18955840	24.4581	0.662799	1.58315	0.011711	0.80301	1	ENSMGAG00000008332
gene:ENSMGAG00000010663	GL429722.1	complement(281540..282105)	12.3801	0.941566	1.92061	0.0117283	0.80301	1	ENSMGAG00000010663
NDST1	15	complement(12693066..12701124)	8.64021	-1.02342	-2.03273	0.011762	0.80301	1	ENSMGAG00000006555
PRRX1	10	6060461..6066412	3.85121	1.26178	2.39791	0.0117697	0.80301	1	ENSMGAG00000004058
ARRDC2	GL424873.1	complement(62..1995)	49.7011	0.756371	1.68924	0.0119174	0.806349	1	ENSMGAG00000004224
POLE	17	complement(10579990..10598978)	4.04161	-0.868771	-1.82611	0.0119718	0.806349	1	ENSMGAG00000009340
PTGFRN	1	96625609..96660820	7.41079	-0.901005	-1.86737	0.0120509	0.806349	1	ENSMGAG00000013294
CTLA4	7	complement(13614400..13617771)	0.691975	1.66558	3.17242	0.0120825	0.806349	1	ENSMGAG00000008759
ACTA2	8	complement(21478357..21486275)	656.998	0.893995	1.85831	0.0121041	0.806349	1	ENSMGAG00000008313
C6orf62	3	39629902..39635464	45.6852	-0.765141	-1.69954	0.0122902	0.812376	1	ENSMGAG00000007993
KIAA1755	22	11306005..11314389	12.1576	-1.13859	-2.20166	0.0123096	0.812376	1	ENSMGAG00000007853
PHF12	3	91590586..91619892	5.32403	0.802141	1.74369	0.012423	0.814576	1	ENSMGAG00000012752
gene:ENSMGAG00000008770	Z	74956884..74957627	2.64852	1.50071	2.82982	0.0124917	0.814576	1	ENSMGAG00000008770
PPM1H	1	complement(34783566..34851337)	15.9055	-0.964596	-1.95152	0.012516	0.814576	1	ENSMGAG00000010144
gene:ENSMGAG00000011852	1	complement(48908598..49001123)	30.233	0.797718	1.73835	0.0125855	0.815344	1	ENSMGAG00000011852
MON2	1	34688350..34743592	4.51151	-0.839859	-1.78987	0.012669	0.817005	1	ENSMGAG00000010123
FANCI	12	complement(12875770..12898434)	8.6301	-0.795696	-1.73591	0.01281	0.822029	1	ENSMGAG00000008560
AMBP	19	complement(534788..540008)	0.106805	6.05945	66.6923	0.0129176	0.822029	1	ENSMGAG00000001224
SSH2	21	complement(6356178..6387145)	15.0861	-0.825604	-1.77228	0.0129215	0.822029	1	ENSMGAG00000008902
TRIM29	26	4066856..4100712	0.0821881	3.67894	12.8077	0.0131025	0.823969	1	ENSMGAG00000002352
PITPNM2	17	5343923..5401965	3.83912	-0.942204	-1.92146	0.0131206	0.823969	1	ENSMGAG00000003421
DNER	11	complement(9667061..9732549)	22.0815	-0.717971	-1.64487	0.0132823	0.823969	1	ENSMGAG00000005969
CYP7A1	3	complement(61999074..62006016)	0.1554	2.12119	4.35054	0.0132909	0.823969	1	ENSMGAG00000011038
gene:ENSMGAG00000006932	2	15373455..15375704	8450.82	0.761525	1.69528	0.0133427	0.823969	1	ENSMGAG00000006932
SLC6A17	28	1246506..1253097	0.400682	1.42534	2.68578	0.0133468	0.823969	1	ENSMGAG00000002298
B3GNT7	11	15238945..15240994	10.4773	-0.882913	-1.84409	0.0133604	0.823969	1	ENSMGAG00000008145
RASSF1	14	complement(1400576..1401648)	39.1802	0.781473	1.71888	0.0135364	0.824458	1	ENSMGAG00000001450
MYLK	7	complement(28582677..28723961)	15.5469	0.926576	1.90076	0.0135462	0.824458	1	ENSMGAG00000012084
STK4	22	complement(5467183..5502017)	28.0723	-0.720146	-1.64735	0.0135546	0.824458	1	ENSMGAG00000003574
TINAGL1	25	complement(4248810..4251122)	6.78786	1.04718	2.06649	0.0136757	0.824458	1	ENSMGAG00000004222
SEMA3G	14	complement(3101205..3104828)	2.44912	1.00809	2.01124	0.0137102	0.824458	1	ENSMGAG00000003588
SYN3	1	54021150..54203988	0.291426	-1.79963	-3.4813	0.0137745	0.824458	1	ENSMGAG00000012781
PECAM1	20	8210035..8225941	6.21233	1.06226	2.0882	0.0138265	0.824458	1	ENSMGAG00000007729
LRRTM3	8	11496404..11497948	0.917423	1.95375	3.8738	0.0138353	0.824458	1	ENSMGAG00000015320
gene:ENSMGAG00000008926	6	23551917..23585755	9.40074	-0.829181	-1.77668	0.0139276	0.826467	1	ENSMGAG00000008926
GRIA4	1	complement(188919056..189189042)	0.0659416	2.87104	7.3159	0.0140072	0.827712	1	ENSMGAG00000015163
FLT1	1	183347989..183436302	0.915543	1.06713	2.09526	0.0141468	0.82944	1	ENSMGAG00000015095
gene:ENSMGAG00000017107	17	complement(7862317..7866500)	2.39613	-1.02992	-2.04191	0.0141539	0.82944	1	ENSMGAG00000017107
TANGO6	13	19004251..19030018	12.7163	0.730632	1.65937	0.0142135	0.829491	1	ENSMGAG00000007930
GPLD1	3	5598626..5620151	0.0920324	-2.50676	-5.68343	0.0143301	0.8316	1	ENSMGAG00000002350
gene:ENSMGAG00000002835	5	5088671..5093734	1.3832	-1.51604	-2.86004	0.0143674	0.8316	1	ENSMGAG00000002835
RGCC	1	174489915..174491217	13.2175	1.20267	2.30164	0.014509	0.836367	1	ENSMGAG00000014973
TUBB1	22	complement(11704218..11707458)	44.8628	0.938654	1.91674	0.0149285	0.849223	1	ENSMGAG00000008740
PDLIM3	4	complement(43366146..43387151)	6.75996	1.04336	2.06103	0.0150854	0.849223	1	ENSMGAG00000011405
NPTXR	1	complement(50598618..50611729)	9.07879	0.849131	1.80142	0.0151414	0.849223	1	ENSMGAG00000013491
gene:ENSMGAG00000001066	6	complement(10451..11805)	0.626922	1.76399	3.39637	0.015184	0.849223	1	ENSMGAG00000001066
SPTB	5	complement(6254516..6271367)	4.78325	0.960735	1.9463	0.0152606	0.849223	1	ENSMGAG00000004480
CASKIN2	20	complement(10963833..10989970)	1.32163	-0.954508	-1.93792	0.0153507	0.849223	1	ENSMGAG00000009522
gene:ENSMGAG00000005490	GL425392.1	59..1797	0.249512	-2.4303	-5.39006	0.0153626	0.849223	1	ENSMGAG00000005490
gene:ENSMGAG00000006125	GL425607.1	2854..3397	158.882	0.697042	1.62118	0.0153645	0.849223	1	ENSMGAG00000006125
MAP3K7CL	1	109637290..109667024	0.140483	2.92801	7.6106	0.0153954	0.849223	1	ENSMGAG00000014507
WDR11	8	33519939..33551736	15.2145	-0.761935	-1.69576	0.0154602	0.849223	1	ENSMGAG00000011438
MMS22L	2	75559300..75644016	4.69866	-0.856256	-1.81033	0.0155636	0.849223	1	ENSMGAG00000013588
CHL1	14	17986021..18091513	14.5958	1.16738	2.24603	0.0156031	0.849223	1	ENSMGAG00000009762
PRPF8	21	complement(5744667..5762311)	32.0239	-0.790529	-1.72971	0.0157516	0.849223	1	ENSMGAG00000004769
STON2	5	complement(42632398..42639262)	19.6613	-0.752229	-1.68439	0.0159035	0.849223	1	ENSMGAG00000017039
WFS1	4	62920575..62942044	56.1026	-0.674463	-1.596	0.0159081	0.849223	1	ENSMGAG00000012785
TBC1D9	4	complement(10096158..10138613)	13.9118	-0.743932	-1.67473	0.015944	0.849223	1	ENSMGAG00000003086
SEC16A	19	8135641..8156709	4.35517	-0.751318	-1.68333	0.0159489	0.849223	1	ENSMGAG00000007526
FASN	20	4922842..4951483	3.23118	-0.987827	-1.9832	0.0160002	0.849223	1	ENSMGAG00000005000
gene:ENSMGAG00000009293	17	10550568..10564365	3.1123	0.870367	1.82813	0.0160342	0.849223	1	ENSMGAG00000009293
CLEC3B	6	complement(43992986..43998008)	147.783	0.677171	1.599	0.0160469	0.849223	1	ENSMGAG00000011653
ANGPTL5	1	190581095..190593932	0.311765	2.76157	6.78132	0.0160544	0.849223	1	ENSMGAG00000015178
HSD17B2	13	15797471..15805943	2.21494	1.18274	2.27007	0.0161823	0.849223	1	ENSMGAG00000006940
gene:ENSMGAG00000012063	3	77017146..77227263	2.43874	-0.796763	-1.7372	0.0162268	0.849223	1	ENSMGAG00000012063
gene:ENSMGAG00000007524	GL426398.1	5..795	3.70634	1.30983	2.47912	0.0162386	0.849223	1	ENSMGAG00000007524
SZT2	10	20518102..20572025	2.36077	-0.834651	-1.78343	0.0162754	0.849223	1	ENSMGAG00000009792
DBN1	15	complement(9753755..9761014)	6.01573	0.925165	1.8989	0.0163764	0.849223	1	ENSMGAG00000003722
NUP205	1	complement(48501444..48545743)	9.41024	-0.769959	-1.70522	0.016429	0.849223	1	ENSMGAG00000011752
TPM2	Z	9470621..9486654	128.275	0.58454	1.49956	0.0164367	0.849223	1	ENSMGAG00000002571
gene:ENSMGAG00000004136	4	complement(13267722..13441130)	5.0359	1.01163	2.01619	0.0166763	0.849223	1	ENSMGAG00000004136
gene:ENSMGAG00000005007	9	9247191..9258363	4.20137	-1.00654	-2.00908	0.0166985	0.849223	1	ENSMGAG00000005007
AQP3	Z	complement(7360937..7365524)	4.01058	1.17488	2.25774	0.0167864	0.849223	1	ENSMGAG00000001744
PLEK2	5	complement(29986108..29996714)	9.12072	-0.778257	-1.71506	0.0168463	0.849223	1	ENSMGAG00000011972
gene:ENSMGAG00000005761	30	complement(3776630..3784307)	120.135	0.607761	1.52389	0.0169137	0.849223	1	ENSMGAG00000005761
NFKBID	26	complement(4560117..4571001)	1.2568	1.5207	2.86931	0.0169206	0.849223	1	ENSMGAG00000002713
GJA4	25	complement(4302151..4303182)	3.54633	0.985195	1.97958	0.0169259	0.849223	1	ENSMGAG00000016540
CNOT1	13	1363239..1411071	7.96924	-0.783399	-1.72118	0.0169394	0.849223	1	ENSMGAG00000001908
gene:ENSMGAG00000004513	30	3048489..3056139	0.0971016	-2.55694	-5.88457	0.0169916	0.849223	1	ENSMGAG00000004513
MET	1	complement(25613531..25684768)	2.07005	-0.873469	-1.83206	0.0170169	0.849223	1	ENSMGAG00000008925
gene:ENSMGAG00000001123	27	complement(698104..698892)	21.4146	1.1688	2.24825	0.0170777	0.849255	1	ENSMGAG00000001123
NUP214	19	6228057..6267187	9.48791	-0.797052	-1.73755	0.0173134	0.857955	1	ENSMGAG00000005609
NDNF	4	36155966..36159348	1.03045	1.4479	2.72811	0.0175102	0.861704	1	ENSMGAG00000010709
C6orf89	28	1546824..1559681	6.96184	-0.9107	-1.87996	0.0175111	0.861704	1	ENSMGAG00000002553
ITGB5	7	complement(29324103..29362492)	26.668	0.730832	1.6596	0.0176103	0.863576	1	ENSMGAG00000012123
PRTFDC1	6	16948533..16987708	10.0223	0.887045	1.84938	0.0177101	0.864135	1	ENSMGAG00000007067
CUBN	6	20032874..20160074	0.308792	-0.926636	-1.90084	0.0178097	0.864135	1	ENSMGAG00000007787
gene:ENSMGAG00000016457	20	11030914..11032264	5.96891	-1.16934	-2.24908	0.0178562	0.864135	1	ENSMGAG00000016457
TRAPPC9	3	complement(96623378..96710449)	7.71306	-0.723435	-1.65111	0.0179243	0.864135	1	ENSMGAG00000012927
gene:ENSMGAG00000010735	1	complement(202333406..202337538)	0.262748	1.59262	3.01597	0.0179723	0.864135	1	ENSMGAG00000010735
gene:ENSMGAG00000014454	1	complement(97049117..97049398)	0.915927	2.3741	5.18411	0.0179888	0.864135	1	ENSMGAG00000014454
SLC13A4	1	59590253..59640017	0.068826	3.63736	12.4439	0.0181577	0.869293	1	ENSMGAG00000013279
gene:ENSMGAG00000015271	GL424472.1	3422..5027	0.682282	1.64997	3.13827	0.0182598	0.871228	1	ENSMGAG00000015271
TRAK2	7	complement(11622814..11641180)	2.32378	-0.852224	-1.80528	0.0187483	0.891525	1	ENSMGAG00000007874
ABI3BP	1	complement(89025455..89178268)	0.356295	1.4737	2.77734	0.0190396	0.897813	1	ENSMGAG00000014369
PTPRF	10	20780773..20952661	22.6346	-0.769698	-1.70491	0.0190406	0.897813	1	ENSMGAG00000009809
LPAR6	1	complement(177399338..177401385)	9.89551	0.87972	1.84002	0.0191036	0.897813	1	ENSMGAG00000015009
IL1RL1	1	141045267..141069618	7.04664	0.892775	1.85674	0.0191349	0.897813	1	ENSMGAG00000014810
GRK3	17	7257805..7291600	2.58181	0.891039	1.85451	0.0192811	0.898735	1	ENSMGAG00000006659
gene:ENSMGAG00000014152	2	complement(110998034..110999521)	16.4694	-0.953909	-1.93711	0.0193109	0.898735	1	ENSMGAG00000014152
SLCO4A1	22	8943227..8956670	9.41353	-0.791943	-1.73141	0.0193454	0.898735	1	ENSMGAG00000005776
CYP17A1	8	complement(25702110..25705256)	571.514	0.681313	1.6036	0.0195107	0.902432	1	ENSMGAG00000010364
FBXO33	5	complement(39156576..39161312)	35.6426	-0.659401	-1.57943	0.0195602	0.902432	1	ENSMGAG00000012602
EYA1	3	complement(67175851..67256462)	0.250282	-1.50783	-2.84383	0.0196899	0.902432	1	ENSMGAG00000011470
gene:ENSMGAG00000002412	12	complement(1723579..1726382)	2.28529	-1.07257	-2.10318	0.0198694	0.902432	1	ENSMGAG00000002412
gene:ENSMGAG00000016731	GL424516.1	25447..25831	593.089	0.722004	1.64947	0.0198774	0.902432	1	ENSMGAG00000016731
RSRP1	25	2134522..2139087	67.1572	0.687116	1.61006	0.019951	0.902432	1	ENSMGAG00000002017
gene:ENSMGAG00000007557	4	26830601..26834662	18.4316	0.819975	1.76538	0.0199535	0.902432	1	ENSMGAG00000007557
PPP1R1B	GL428165.1	complement(18159..20275)	1.04585	1.8969	3.72412	0.0199573	0.902432	1	ENSMGAG00000008558
PIWIL1	17	complement(3449147..3465888)	3.67758	-0.848953	-1.80119	0.0200181	0.902432	1	ENSMGAG00000002382
MYCT1	2	50840378..50841573	2.45487	1.27176	2.41456	0.020064	0.902432	1	ENSMGAG00000015856
gene:ENSMGAG00000006435	GL425733.1	complement(2332..6827)	65.995	0.750231	1.68206	0.0202109	0.906155	1	ENSMGAG00000006435
gene:ENSMGAG00000002159	9	1752699..1756336	3.04565	0.900512	1.86673	0.0204018	0.907861	1	ENSMGAG00000002159
CHRNA2	2	complement(110510277..110515002)	0.888787	1.2206	2.33044	0.0204516	0.907861	1	ENSMGAG00000014105
gene:ENSMGAG00000017133	4	69745537..69754561	1716.84	-0.885602	-1.84754	0.0205846	0.907861	1	ENSMGAG00000017133
gene:ENSMGAG00000009592	18	complement(1091..1804)	59.5836	0.784828	1.72289	0.0206383	0.907861	1	ENSMGAG00000009592
TRHDE	1	38435366..38590080	0.587588	1.58971	3.0099	0.020702	0.907861	1	ENSMGAG00000010787
gene:ENSMGAG00000003140	5	complement(6581426..6584323)	19.7781	0.74585	1.67696	0.0207295	0.907861	1	ENSMGAG00000003140
SLC26A3	1	complement(14827495..14837867)	2.16146	1.44704	2.72648	0.0208446	0.907861	1	ENSMGAG00000009839
CLVS2	2	complement(63129305..63179146)	1.97435	-1.43336	-2.70075	0.0209032	0.907861	1	ENSMGAG00000013295
ANLN	6	complement(47695701..47717884)	18.7134	-0.688218	-1.61129	0.0209091	0.907861	1	ENSMGAG00000012007
gene:ENSMGAG00000007882	15	complement(14170240..14188911)	0.0689344	1.98972	3.97159	0.0210036	0.907861	1	ENSMGAG00000007882
FZD9	21	complement(242857..244690)	9.39137	0.809561	1.75268	0.0210464	0.907861	1	ENSMGAG00000001120
gene:ENSMGAG00000003144	20	2152092..2162328	0.181749	-1.74758	-3.35796	0.0210927	0.907861	1	ENSMGAG00000003144
ARNT2	12	complement(12305694..12374574)	4.27969	-0.824201	-1.77055	0.0211683	0.907861	1	ENSMGAG00000008186
EFCAB5	21	6434194..6460917	0.179479	1.28531	2.43734	0.0212456	0.907861	1	ENSMGAG00000006223
gene:ENSMGAG00000007009	GL426032.1	36..832	38.9674	0.895967	1.86086	0.0213016	0.907861	1	ENSMGAG00000007009
CPLX2	15	complement(10028653..10029602)	1.58656	1.39875	2.63673	0.0213026	0.907861	1	ENSMGAG00000004776
gene:ENSMGAG00000006469	GL425745.1	31..1348	21.2422	0.710788	1.6367	0.0214569	0.907861	1	ENSMGAG00000006469
gene:ENSMGAG00000001147	6	complement(41929..45458)	8.5198	0.731861	1.66078	0.0216069	0.907861	1	ENSMGAG00000001147
gene:ENSMGAG00000014186	2	complement(112024881..112042134)	0.242923	-1.98756	-3.96567	0.021804	0.907861	1	ENSMGAG00000014186
CHSY3	Z	complement(47579801..47581301)	3.26385	-0.901876	-1.86849	0.0218729	0.907861	1	ENSMGAG00000006656
PKP2	1	60127799..60160683	30.3377	-0.725304	-1.65325	0.0218976	0.907861	1	ENSMGAG00000013310
FAM110B	3	61873830..61874942	8.41013	-0.814034	-1.75812	0.0219528	0.907861	1	ENSMGAG00000015836
ATRNL1	8	30768754..31003756	6.31751	-0.7775	-1.71416	0.0219849	0.907861	1	ENSMGAG00000011141
PKP1	28	complement(859838..892893)	0.602862	-1.38677	-2.61493	0.0221397	0.907861	1	ENSMGAG00000002027
LMLN	7	complement(29670894..29679822)	1.509	-0.98889	-1.98466	0.0221508	0.907861	1	ENSMGAG00000012242
ATP8A2	1	184300370..184487762	24.8833	-0.833529	-1.78204	0.0222109	0.907861	1	ENSMGAG00000015110
gene:ENSMGAG00000002187	3	complement(4094115..4096074)	0.161503	3.09923	8.56962	0.0222327	0.907861	1	ENSMGAG00000002187
gene:ENSMGAG00000000636	18	complement(24823..80306)	6.99209	1.06986	2.09923	0.0222589	0.907861	1	ENSMGAG00000000636
gene:ENSMGAG00000008120	8	20884523..20886577	0.0601594	5.72805	53.0046	0.022301	0.907861	1	ENSMGAG00000008120
CNGB1	13	complement(2527189..2534079)	0.0439166	5.69845	51.9284	0.0224035	0.907861	1	ENSMGAG00000003563
RSPO3	2	complement(61307942..61332500)	1.11063	1.45148	2.73488	0.0224096	0.907861	1	ENSMGAG00000013258
gene:ENSMGAG00000001880	25	2121283..2127122	18.5396	1.02785	2.03898	0.022443	0.907861	1	ENSMGAG00000001880
GPR55	11	4841523..4842413	0.193657	2.63194	6.19858	0.0226712	0.907861	1	ENSMGAG00000015976
TBC1D1	4	complement(52650285..52738156)	6.15831	-0.722784	-1.65036	0.0226852	0.907861	1	ENSMGAG00000012368
DSTYK	28	1889969..1903840	6.31863	-0.723253	-1.6509	0.0227163	0.907861	1	ENSMGAG00000001096
DEGS2	5	complement(50494753..50510107)	6.60408	-1.03121	-2.04373	0.0227556	0.907861	1	ENSMGAG00000013299
gene:ENSMGAG00000011229	GL429564.1	1140..3870	0.584163	-1.46459	-2.75985	0.0227755	0.907861	1	ENSMGAG00000011229
gene:ENSMGAG00000017172	3	complement(65079657..65079845)	0.681156	2.64061	6.23597	0.0228622	0.907861	1	ENSMGAG00000017172
gene:ENSMGAG00000003470	30	2343859..2345124	11.1081	0.875499	1.83464	0.0229165	0.907861	1	ENSMGAG00000003470
MTA1	10	6915456..6974339	22.3178	-0.627493	-1.54488	0.0229728	0.907861	1	ENSMGAG00000004786
ABTB2	5	18856878..18873368	1.57374	-1.03387	-2.04751	0.0231241	0.907861	1	ENSMGAG00000010227
CSDC2	1	51807242..51811783	0.684217	1.36772	2.58062	0.0232339	0.907861	1	ENSMGAG00000012131
gene:ENSMGAG00000014566	1	complement(114767900..114770675)	14.0446	-0.735028	-1.66443	0.0233622	0.907861	1	ENSMGAG00000014566
MEOX2	6	complement(28763648..28817873)	12.0144	0.728865	1.65733	0.0233764	0.907861	1	ENSMGAG00000010089
C15orf59	12	complement(1558721..1564982)	0.100744	3.66783	12.7094	0.0234743	0.907861	1	ENSMGAG00000002165
PLTP	22	complement(11394834..11398100)	31.1577	0.95552	1.93928	0.0234916	0.907861	1	ENSMGAG00000008336
CALN1	21	complement(1069649..1126629)	0.219347	3.98774	15.8646	0.0235147	0.907861	1	ENSMGAG00000002229
CXorf36	1	116713080..116726348	8.50287	0.862312	1.81795	0.0236405	0.907861	1	ENSMGAG00000014599
SIPA1L1	5	complement(27808581..27871954)	8.57273	-0.613009	-1.52945	0.0236411	0.907861	1	ENSMGAG00000011759
gene:ENSMGAG00000014041	2	106865606..106874000	0.071961	5.71512	52.5318	0.023655	0.907861	1	ENSMGAG00000014041
CEP162	2	80909700..80945820	2.8113	1.14087	2.20515	0.0237727	0.907861	1	ENSMGAG00000013721
KEL	1	81521895..81554621	2.18577	1.09547	2.13682	0.023815	0.907861	1	ENSMGAG00000014189
TPPP3	GL425519.1	complement(152..2427)	29.3033	0.943111	1.92267	0.0238343	0.907861	1	ENSMGAG00000017254
CELSR1	1	complement(15727126..15883998)	0.706075	-0.798302	-1.73905	0.0238402	0.907861	1	ENSMGAG00000007564
CCNJL	15	7452582..7469512	1.2089	-1.2133	-2.31867	0.0238491	0.907861	1	ENSMGAG00000002930
BTG4	26	complement(5869488..5871535)	0.092729	2.85158	7.21791	0.0238653	0.907861	1	ENSMGAG00000003798
C6orf58	2	complement(61088866..61102492)	0.0884213	5.83553	57.1044	0.0239131	0.907861	1	ENSMGAG00000013249
gene:ENSMGAG00000008825	GL428204.1	complement(12603..13644)	36.9213	0.772192	1.70786	0.024133	0.911942	1	ENSMGAG00000008825
TBC1D9B	15	13194843..13209939	25.4111	-0.659382	-1.57941	0.0241497	0.911942	1	ENSMGAG00000007111
CAPRIN2	1	60867714..60898297	35.0624	-0.660355	-1.58047	0.0243997	0.914339	1	ENSMGAG00000013350
gene:ENSMGAG00000005491	21	complement(6087211..6117498)	1.09496	-1.02974	-2.04165	0.0244044	0.914339	1	ENSMGAG00000005491
RGS5	10	7301709..7306925	9.10911	0.824988	1.77152	0.0244074	0.914339	1	ENSMGAG00000005233
gene:ENSMGAG00000003475	GL424633.1	complement(69..2646)	0.124294	-2.80034	-6.96602	0.0246294	0.915249	1	ENSMGAG00000003475
SRL	16	complement(13254023..13265853)	0.0431256	5.49539	45.1103	0.0246337	0.915249	1	ENSMGAG00000009342
EPB42	22	7218636..7227543	9.68505	1.01917	2.02676	0.0247991	0.915249	1	ENSMGAG00000004978
gene:ENSMGAG00000017218	10	complement(21874021..21875551)	2.3474	1.28471	2.43634	0.0248112	0.915249	1	ENSMGAG00000017218
gene:ENSMGAG00000015706	1	48898157..48898537	20.3261	0.835599	1.7846	0.0248114	0.915249	1	ENSMGAG00000015706
ABCA1	Z	complement(57887252..57984310)	2.49523	-0.801428	-1.74283	0.0248859	0.915249	1	ENSMGAG00000007603
CNN2	GL424783.1	complement(4545..6143)	55.6242	0.681979	1.60434	0.0249529	0.915249	1	ENSMGAG00000003985
ARPP21	6	46425183..46525819	0.312564	1.25041	2.37908	0.0249995	0.915249	1	ENSMGAG00000011901
KCNIP1	15	complement(2963808..2974624)	4.27311	-0.909115	-1.87789	0.0250269	0.915249	1	ENSMGAG00000001827
ECT2	11	complement(19322224..19346387)	20.8935	-0.770162	-1.70546	0.0252724	0.915249	1	ENSMGAG00000009941
GGA3	20	complement(10833643..10846114)	8.67245	-0.669131	-1.59011	0.0253172	0.915249	1	ENSMGAG00000009409
RAD21	3	complement(86184977..86201121)	39.9821	-0.48866	-1.40314	0.02533	0.915249	1	ENSMGAG00000012475
gene:ENSMGAG00000012560	7	complement(33760849..33893413)	0.210602	-1.16387	-2.24057	0.0253726	0.915249	1	ENSMGAG00000012560
RNF38	Z	54750154..54769781	109.782	-0.620651	-1.53757	0.0254309	0.915249	1	ENSMGAG00000007099
P3H1	23	6658111..6662979	44.6312	0.54164	1.45563	0.0255401	0.915249	1	ENSMGAG00000006828
PCNX4	5	complement(56967324..56976925)	6.36883	-0.716536	-1.64323	0.0256168	0.915249	1	ENSMGAG00000013581
ADGRL4	10	19337575..19372330	1.62625	1.23913	2.36056	0.0256505	0.915249	1	ENSMGAG00000009334
ENO2	1	80944238..80953701	3.09366	0.788802	1.72764	0.0259386	0.915249	1	ENSMGAG00000014131
NCAPD3	26	complement(2633569..2659671)	13.2491	-0.708617	-1.63424	0.0260242	0.915249	1	ENSMGAG00000001524
OTOR	2	5726562..5731012	0.222062	3.19999	9.18952	0.026072	0.915249	1	ENSMGAG00000006158
gene:ENSMGAG00000011232	7	complement(23226184..23227652)	2.59442	0.960744	1.94631	0.0260755	0.915249	1	ENSMGAG00000011232
gene:ENSMGAG00000010694	1	38385915..38390708	1.07284	-1.2297	-2.34518	0.0261017	0.915249	1	ENSMGAG00000010694
gene:ENSMGAG00000008103	14	12157691..12161270	13.11	0.776876	1.71342	0.0261177	0.915249	1	ENSMGAG00000008103
CPM	1	complement(37064355..37096072)	2.49702	0.913115	1.88311	0.0261269	0.915249	1	ENSMGAG00000010537
TRIP12	11	complement(9792832..9856079)	15.6164	-0.6099	-1.52615	0.0261773	0.915249	1	ENSMGAG00000006008
MTMR9	2	112982542..113002041	10.6162	-0.766058	-1.70062	0.0262573	0.915249	1	ENSMGAG00000014200
EPG5	Z	2283502..2330951	0.333003	-1.0447	-2.06294	0.0262818	0.915249	1	ENSMGAG00000001532
gene:ENSMGAG00000001551	GL428377.1	complement(431..2387)	51.1439	0.667136	1.58792	0.0262964	0.915249	1	ENSMGAG00000001551
NPC1	3	complement(52549709..52570390)	91.0746	-0.683945	-1.60653	0.026311	0.915249	1	ENSMGAG00000010105
gene:ENSMGAG00000016402	GL429727.1	23657..24524	6.68274	-0.985607	-1.98015	0.0265434	0.920935	1	ENSMGAG00000016402
ULK2	21	7125109..7158129	35.6378	-0.615489	-1.53208	0.0266049	0.920935	1	ENSMGAG00000006805
RTN4RL2	GL425865.1	3..1291	5.73421	0.956081	1.94003	0.0267417	0.921895	1	ENSMGAG00000017094
SUCNR1	11	complement(23673950..23674981)	29.7959	-0.928713	-1.90358	0.0267632	0.921895	1	ENSMGAG00000010883
gene:ENSMGAG00000010467	5	complement(59576178..59585687)	48.9771	0.614845	1.53139	0.0269315	0.925088	1	ENSMGAG00000010467
LUM	1	complement(44760756..44773214)	21.4453	1.0037	2.00514	0.0270198	0.925088	1	ENSMGAG00000011279
VPS53	21	7258592..7283900	13.61	-0.728927	-1.65741	0.0270524	0.925088	1	ENSMGAG00000007026
DOCK5	24	complement(845224..898258)	1.46628	-0.810945	-1.75436	0.0273767	0.933917	1	ENSMGAG00000000866
CDC42SE1	GL425206.1	complement(675..1766)	57.2868	0.606245	1.52229	0.0275369	0.934985	1	ENSMGAG00000004897
SLC9A7	1	137935005..137971355	27.7712	-0.624191	-1.54135	0.0275405	0.934985	1	ENSMGAG00000014757
DPP10	7	complement(30865976..30957976)	5.08454	0.800822	1.74209	0.0279563	0.946826	1	ENSMGAG00000012354
HIC1	21	5925548..5928084	63.1542	0.624239	1.5414	0.0280418	0.947452	1	ENSMGAG00000005397
CCR4	6	45317809..45318945	0.347674	1.70061	3.25038	0.0281165	0.947706	1	ENSMGAG00000016137
gene:ENSMGAG00000012241	5	complement(31741995..31750502)	9.57687	-0.66293	-1.58329	0.0284001	0.954988	1	ENSMGAG00000012241
FBXL16	16	complement(13764952..13768548)	0.0676574	2.85947	7.25748	0.0286671	0.957737	1	ENSMGAG00000009763
gene:ENSMGAG00000015252	1	200948973..200950382	3.02329	1.14575	2.21261	0.0286713	0.957737	1	ENSMGAG00000015252
gene:ENSMGAG00000004892	GL425187.1	complement(57065..58136)	8.93978	0.854958	1.80871	0.0287052	0.957737	1	ENSMGAG00000004892
URB2	2	41042062..41056457	9.35071	-0.73202	-1.66096	0.0287897	0.957737	1	ENSMGAG00000012073
ZFYVE28	4	66332429..66378594	8.07121	-0.652078	-1.57143	0.0290126	0.957737	1	ENSMGAG00000013023
SOS2	5	complement(60557681..60604749)	10.0915	-0.623959	-1.5411	0.0291775	0.957737	1	ENSMGAG00000013729
MMRN2	8	5408423..5418270	2.55295	0.9356	1.91269	0.02918	0.957737	1	ENSMGAG00000002452
RBPJL	22	complement(5425690..5430479)	0.691059	1.25808	2.39176	0.0291865	0.957737	1	ENSMGAG00000017264
MED12L	11	complement(23731215..23832639)	6.15606	-0.6378	-1.55596	0.0292601	0.957737	1	ENSMGAG00000010910
MYO1C	21	complement(5553375..5585076)	35.4631	-0.551037	-1.46514	0.0292702	0.957737	1	ENSMGAG00000004918
gene:ENSMGAG00000016407	14	11893149..11902559	1.02073	-1.06811	-2.09669	0.0293329	0.957737	1	ENSMGAG00000016407
MEIS2	5	32399049..32560973	4.72497	1.03782	2.05312	0.0293371	0.957737	1	ENSMGAG00000012284
gene:ENSMGAG00000017054	9	313375..318440	0.0777191	5.49554	45.1153	0.0293635	0.957737	1	ENSMGAG00000017054
TP53BP1	12	complement(20204460..20232672)	9.32055	-0.595136	-1.51061	0.0294789	0.959286	1	ENSMGAG00000010760
CDH13	13	16012325..16422453	2.51044	1.02546	2.03561	0.0297494	0.964447	1	ENSMGAG00000006976
ZFAND2A	16	complement(2421759..2424855)	250.192	0.48877	1.40325	0.0299274	0.964447	1	ENSMGAG00000002231
gene:ENSMGAG00000015265	1	201640569..201673262	0.067119	-2.26264	-4.7987	0.0299695	0.964447	1	ENSMGAG00000015265
BARX2	26	1404544..1432592	0.379464	1.90317	3.74034	0.0300234	0.964447	1	ENSMGAG00000001019
gene:ENSMGAG00000003538	21	complement(4479027..4482781)	1.73243	1.14164	2.20632	0.03015	0.964447	1	ENSMGAG00000003538
SYNC	25	complement(4936102..4937843)	16.1872	0.716252	1.64291	0.0302525	0.964447	1	ENSMGAG00000004985
TICRR	12	complement(12736552..12752641)	11.2874	-0.653955	-1.57348	0.0303279	0.964447	1	ENSMGAG00000008448
FOCAD	Z	36382727..36468222	5.78101	-0.787216	-1.72574	0.0303729	0.964447	1	ENSMGAG00000005709
EVA1B	25	3882398..3882996	5.9274	0.930345	1.90573	0.0304523	0.964447	1	ENSMGAG00000003624
EPHA3	1	93457801..93659237	0.502758	1.09233	2.13218	0.0304722	0.964447	1	ENSMGAG00000014410
DENND4C	Z	35795869..35822540	2.18235	-0.835091	-1.78397	0.0305378	0.964447	1	ENSMGAG00000005660
REM1	22	10825160..10827263	19.8306	0.76182	1.69563	0.0305659	0.964447	1	ENSMGAG00000007072
gene:ENSMGAG00000007649	GL426490.1	complement(1574..4843)	24.7155	0.701256	1.62592	0.0306515	0.964447	1	ENSMGAG00000007649
SYCP2L	3	complement(10495041..10515336)	0.210907	-1.50167	-2.83171	0.0308134	0.964447	1	ENSMGAG00000003501
TENM1	9	15192830..15424093	0.0128121	-3.84547	-14.3748	0.0308572	0.964447	1	ENSMGAG00000007089
DIP2B	GL429722.1	224672..255387	4.83463	-0.740136	-1.67033	0.0308975	0.964447	1	ENSMGAG00000010609
PDPR	13	989946..1006415	28.2023	-0.822336	-1.76827	0.0309074	0.964447	1	ENSMGAG00000001456
GPX7	10	25210670..25218265	7.52597	0.769596	1.70479	0.0309134	0.964447	1	ENSMGAG00000011200
ANAPC1	2	complement(3161443..3194531)	10.474	-0.685111	-1.60783	0.0310651	0.964447	1	ENSMGAG00000002869
gene:ENSMGAG00000009539	14	16353978..16371977	0.176708	2.34105	5.06672	0.0311411	0.964447	1	ENSMGAG00000009539
gene:ENSMGAG00000001501	9	1214809..1232697	20.0134	-0.620026	-1.5369	0.0312222	0.964447	1	ENSMGAG00000001501
LIF	GL425259.1	complement(639..1393)	3.99961	1.18285	2.27024	0.0312863	0.964447	1	ENSMGAG00000005002
RAB34	21	6207323..6208268	25.4324	0.714369	1.64077	0.0313022	0.964447	1	ENSMGAG00000005852
GTF2I	21	complement(2877533..2932569)	24.0582	-0.629538	-1.54707	0.0313139	0.964447	1	ENSMGAG00000002373
SLC5A3	1	complement(111151432..111153573)	12.8885	-0.684713	-1.60738	0.0314571	0.964447	1	ENSMGAG00000016141
KBTBD3	1	188848333..188852938	0.467244	1.21898	2.32782	0.0315586	0.964447	1	ENSMGAG00000015161
MYOCD	20	complement(855532..888735)	2.08043	0.945065	1.92528	0.0316733	0.964447	1	ENSMGAG00000002098
VTN	21	complement(6068391..6072583)	15.8786	1.20268	2.30167	0.0316777	0.964447	1	ENSMGAG00000005636
LCK	25	complement(4835233..4840718)	0.117302	2.20683	4.61659	0.0316904	0.964447	1	ENSMGAG00000004710
ID1	22	10847726..10848214	15.6617	0.929646	1.90481	0.0317011	0.964447	1	ENSMGAG00000007118
NOL4	3	complement(56786136..56940397)	0.057315	-2.89262	-7.4262	0.0317803	0.964447	1	ENSMGAG00000010644
SLC13A5	21	10172907..10184611	0.189722	-1.94128	-3.84046	0.0319226	0.964447	1	ENSMGAG00000008699
gene:ENSMGAG00000005296	10	complement(7279539..7285270)	33.7777	-0.823025	-1.76911	0.0319376	0.964447	1	ENSMGAG00000005296
S100A6	GL425210.1	6722..7944	361.172	0.608769	1.52496	0.0319658	0.964447	1	ENSMGAG00000004912
BMPR2	7	12032796..12078843	11.5264	-0.567069	-1.48151	0.0320557	0.964447	1	ENSMGAG00000008156
TMEM214	GL426037.1	complement(21514..25061)	39.8047	0.624077	1.54122	0.0320959	0.964447	1	ENSMGAG00000014954
VRTN	5	39404980..39407094	0.120838	-2.00465	-4.01291	0.0324523	0.969762	1	ENSMGAG00000012667
TPP2	1	complement(148705862..148758141)	15.562	-0.660484	-1.58061	0.0324663	0.969762	1	ENSMGAG00000014882
HPS6	8	6080698..6082656	15.5518	0.719904	1.64707	0.0325543	0.969762	1	ENSMGAG00000002655
KY	11	complement(3175847..3187223)	0.063519	3.12723	8.73757	0.0325903	0.969762	1	ENSMGAG00000002387
gene:ENSMGAG00000010823	10	complement(22904773..22907879)	25.0978	1.09388	2.13447	0.0326843	0.969762	1	ENSMGAG00000010823
gene:ENSMGAG00000017124	Z	complement(66035038..66054552)	3.65746	-1.21682	-2.32433	0.0326848	0.969762	1	ENSMGAG00000017124
FHL1	9	3793383..3796729	34.0847	0.730306	1.65899	0.0327929	0.970933	1	ENSMGAG00000003498
gene:ENSMGAG00000007124	GL426137.1	complement(3..1002)	14.5311	0.889878	1.85302	0.0329754	0.974291	1	ENSMGAG00000007124
MEGF11	12	complement(18216524..18406996)	0.213915	-1.32109	-2.49856	0.0334635	0.986003	1	ENSMGAG00000009776
INTS1	16	complement(2630714..2655801)	2.94414	-0.741565	-1.67199	0.0335708	0.986003	1	ENSMGAG00000002547
gene:ENSMGAG00000005553	9	11205268..11205979	20.4294	0.759159	1.6925	0.0336394	0.986003	1	ENSMGAG00000005553
EARS2	16	7224047..7230675	10.8412	-0.730491	-1.6592	0.0337285	0.986003	1	ENSMGAG00000006567
FAM126A	6	complement(31381408..31401960)	62.9317	-0.620446	-1.53735	0.033776	0.986003	1	ENSMGAG00000010430
SGPL1	8	complement(12951038..12970760)	28.0251	-0.619672	-1.53653	0.0337907	0.986003	1	ENSMGAG00000005166
LAMA2	2	complement(60114211..60392514)	19.3475	-0.601841	-1.51765	0.0339654	0.986209	1	ENSMGAG00000013200
CARD10	1	complement(50133091..50144901)	0.0694895	-2.35989	-5.1333	0.034008	0.986209	1	ENSMGAG00000012568
CYP27C1	7	24848001..24865118	0.285878	1.48017	2.78982	0.0340996	0.986209	1	ENSMGAG00000011716
SARM1	21	6073145..6078577	5.39794	1.39182	2.62409	0.034147	0.986209	1	ENSMGAG00000005662
gene:ENSMGAG00000014570	1	complement(115007727..115016640)	12.7371	-0.749739	-1.68149	0.0342347	0.986209	1	ENSMGAG00000014570
RFESD	Z	complement(60871881..60876461)	11.4548	1.05115	2.07218	0.0343252	0.986209	1	ENSMGAG00000008127
LIN28B	2	complement(71414954..71470860)	0.117306	3.42618	10.7494	0.0343375	0.986209	1	ENSMGAG00000013531
gene:ENSMGAG00000016702	5	17121069..17125533	51.2797	0.583607	1.49859	0.0344132	0.986209	1	ENSMGAG00000016702
MYH11	16	complement(7867798..7920893)	7.63702	0.838406	1.78807	0.0344806	0.986209	1	ENSMGAG00000007022
TRAF6	5	complement(19754985..19766121)	3.40535	-0.883274	-1.84456	0.0345988	0.986209	1	ENSMGAG00000010397
gene:ENSMGAG00000014037	2	106509283..106523876	0.0351612	5.56803	47.4399	0.0346508	0.986209	1	ENSMGAG00000014037
PLXNA1	14	10410257..10494324	7.58001	-0.640484	-1.55885	0.0346936	0.986209	1	ENSMGAG00000007508
RETREG2	7	complement(23372299..23383605)	65.377	0.649681	1.56882	0.0347055	0.986209	1	ENSMGAG00000012223
PARP3	14	complement(3151720..3154631)	4.01739	0.82064	1.76619	0.0347905	0.986452	1	ENSMGAG00000003932
CDH3	13	18989409..19001287	34.3892	-0.674459	-1.596	0.0348538	0.986452	1	ENSMGAG00000008446
gene:ENSMGAG00000016927	GL427575.1	334..1114	1.16432	1.467	2.76446	0.0352499	0.995669	1	ENSMGAG00000016927
ACOT7	23	616561..622247	18.8395	0.662326	1.58263	0.0354915	0.999966	1	ENSMGAG00000001348
CUEDC1	21	9140246..9144936	0.954414	1.11586	2.16724	0.0356275	0.999966	1	ENSMGAG00000008235
gene:ENSMGAG00000007419	3	37967457..38059221	0.329456	2.16855	4.49571	0.0357109	0.999966	1	ENSMGAG00000007419
PLD5	2	36200496..36290425	4.26988	-0.844449	-1.79558	0.0358937	0.999966	1	ENSMGAG00000011519
TRPM1	12	5209196..5248460	0.040343	-2.62795	-6.18148	0.0359599	0.999966	1	ENSMGAG00000004707
TBCK	4	19229361..19346265	14.7254	-0.618378	-1.53515	0.0359639	0.999966	1	ENSMGAG00000005932
TMEM183A	28	complement(958153..969230)	157.153	0.640209	1.55856	0.0363716	0.999966	1	ENSMGAG00000002067
CRMP1	4	complement(62623197..62665929)	1.21017	0.984104	1.97808	0.0365635	0.999966	1	ENSMGAG00000012744
GFI1B	19	6928127..6936815	2.43485	1.06034	2.08542	0.0365853	0.999966	1	ENSMGAG00000006129
SLC15A1	1	73038825..73060436	13.8223	-0.640986	-1.55939	0.0366075	0.999966	1	ENSMGAG00000014897
C20orf85	22	complement(12098761..12103416)	0.105586	5.2144	37.1272	0.0368893	0.999966	1	ENSMGAG00000009018
METAP1	4	42165215..42173969	18.8513	-0.573798	-1.48844	0.0375049	0.999966	1	ENSMGAG00000011181
VASH2	2	complement(22012464..22032937)	22.0532	0.832974	1.78135	0.0377066	0.999966	1	ENSMGAG00000009679
gene:ENSMGAG00000011055	11	complement(24185662..24189279)	0.455591	-1.29696	-2.4571	0.0378927	0.999966	1	ENSMGAG00000011055
gene:ENSMGAG00000009856	8	24611462..24621043	12.0397	-0.722848	-1.65044	0.0378933	0.999966	1	ENSMGAG00000009856
FOXM1	1	79103868..79113958	20.1092	-0.694216	-1.618	0.0380867	0.999966	1	ENSMGAG00000013924
gene:ENSMGAG00000009979	6	27282791..27292644	10.794	0.936568	1.91397	0.0380874	0.999966	1	ENSMGAG00000009979
CREG1	1	96186264..96188902	279.774	0.697598	1.6218	0.0380966	0.999966	1	ENSMGAG00000014432
WDFY4	8	20620271..20740389	0.25315	-0.949824	-1.93164	0.0381023	0.999966	1	ENSMGAG00000008076
gene:ENSMGAG00000005756	Z	36778398..36784049	10.5923	-0.657487	-1.57733	0.0382489	0.999966	1	ENSMGAG00000005756
ZBTB44	26	complement(1686326..1699827)	4.42436	0.858178	1.81275	0.0383182	0.999966	1	ENSMGAG00000001211
SLC31A1	19	1389523..1398385	8.80281	-0.859845	-1.81484	0.0383411	0.999966	1	ENSMGAG00000001774
NNT	Z	14702689..14748563	21.6825	-0.583353	-1.49833	0.0383777	0.999966	1	ENSMGAG00000003622
gene:ENSMGAG00000002701	28	complement(1705276..1712518)	0.0621023	2.9825	7.90357	0.0383818	0.999966	1	ENSMGAG00000002701
WDFY1	11	complement(7947760..7963205)	161.83	-0.610178	-1.52645	0.0383862	0.999966	1	ENSMGAG00000004891
ATP9B	3	complement(4496922..4639933)	14.0987	-0.543741	-1.45775	0.0384634	0.999966	1	ENSMGAG00000002250
CH25H	8	complement(21577179..21578003)	13.9755	0.883284	1.84457	0.0385241	0.999966	1	ENSMGAG00000015329
TBC1D30	1	35501382..35548165	21.332	-0.634841	-1.55277	0.0385477	0.999966	1	ENSMGAG00000010270
VSIR	8	12571377..12574543	15.9168	0.71373	1.64004	0.0388603	0.999966	1	ENSMGAG00000004998
KITLG	1	complement(43748853..43774197)	8.36531	0.820918	1.76653	0.0388839	0.999966	1	ENSMGAG00000011203
GCN1	17	9976272..10014771	7.7786	-0.724584	-1.65242	0.0389515	0.999966	1	ENSMGAG00000008798
gene:ENSMGAG00000005378	GL425315.1	complement(23..1218)	48.0468	0.669904	1.59097	0.0390093	0.999966	1	ENSMGAG00000005378
gene:ENSMGAG00000001988	5	complement(3233958..3271062)	3.43104	1.0138	2.01922	0.03902	0.999966	1	ENSMGAG00000001988
SMYD1	4	69779408..69822783	0.219485	1.85952	3.62886	0.0390542	0.999966	1	ENSMGAG00000013166
KRT80	4	67434092..67448214	4.32287	-0.851067	-1.80383	0.0390939	0.999966	1	ENSMGAG00000017303
CHCHD7	3	61248799..61266633	19.1418	0.61657	1.53323	0.0391261	0.999966	1	ENSMGAG00000011004
SIDT1	1	complement(82942052..82968354)	7.82116	-0.705001	-1.63015	0.0391278	0.999966	1	ENSMGAG00000014247
FNDC3A	1	177708640..177806290	20.6696	-0.529618	-1.44355	0.0391807	0.999966	1	ENSMGAG00000015011
AAK1	24	18250..70516	3.49436	-0.78149	-1.71891	0.0391923	0.999966	1	ENSMGAG00000000645
GDAP1L1	22	complement(5775269..5786007)	1.62858	0.990785	1.98727	0.0395707	0.999966	1	ENSMGAG00000004044
gene:ENSMGAG00000014944	1	complement(161272819..161274455)	2.15175	1.22861	2.34341	0.0396961	0.999966	1	ENSMGAG00000014944
PSD2	15	530505..563149	2.73749	-0.760358	-1.69391	0.0397463	0.999966	1	ENSMGAG00000000998
EIF2B3	10	complement(21665843..21760042)	38.2098	0.602035	1.51786	0.0398281	0.999966	1	ENSMGAG00000010268
DND1	15	230016..232837	0.0695491	3.47229	11.0985	0.0398579	0.999966	1	ENSMGAG00000000896
gene:ENSMGAG00000002953	12	complement(1887977..1890076)	0.062447	2.38096	5.20882	0.0400437	0.999966	1	ENSMGAG00000002953
TCF15	22	complement(10785654..10787810)	6.31314	0.739787	1.66993	0.0400445	0.999966	1	ENSMGAG00000007877
DHRS11	21	8504234..8514264	32.5536	-0.661634	-1.58187	0.0401596	0.999966	1	ENSMGAG00000007857
AP1G1	13	19932748..19962231	24.586	-0.600203	-1.51593	0.0401727	0.999966	1	ENSMGAG00000008882
gene:ENSMGAG00000013289	2	62884535..62930646	0.0975561	3.55863	11.783	0.0403057	0.999966	1	ENSMGAG00000013289
VEGFD	1	129831125..129863134	18.3806	0.720558	1.64782	0.0403856	0.999966	1	ENSMGAG00000014695
gene:ENSMGAG00000004062	9	4695542..4697108	1.71319	1.01941	2.02708	0.0405124	0.999966	1	ENSMGAG00000004062
gene:ENSMGAG00000015710	1	48925759..48926070	10.1163	0.82559	1.77226	0.0405408	0.999966	1	ENSMGAG00000015710
RHAG	2	114705477..114720231	17.5963	1.05457	2.07711	0.0405962	0.999966	1	ENSMGAG00000014250
gene:ENSMGAG00000007084	8	complement(14531074..14532760)	24.4341	0.709638	1.63539	0.0408462	0.999966	1	ENSMGAG00000007084
FAM46C	1	complement(82842341..82843543)	5.37803	-0.758949	-1.69226	0.0409983	0.999966	1	ENSMGAG00000016064
IGSF10	11	23716574..23727552	0.0223224	-2.47688	-5.56692	0.0410706	0.999966	1	ENSMGAG00000010903
AZIN2	25	complement(5036842..5040099)	12.5936	0.632296	1.55003	0.0412208	0.999966	1	ENSMGAG00000004993
FBXL2	6	45496742..45533516	17.4651	-0.625465	-1.54271	0.0412368	0.999966	1	ENSMGAG00000011795
TM7SF3	1	68366794..68378169	31.9756	-0.644807	-1.56353	0.041319	0.999966	1	ENSMGAG00000013710
SLC16A12	8	complement(21619664..21627874)	0.4221	-1.26383	-2.40133	0.0414199	0.999966	1	ENSMGAG00000008389
SNX20	13	5975042..5978083	6.61808	0.772053	1.7077	0.0414799	0.999966	1	ENSMGAG00000004775
gene:ENSMGAG00000004283	21	complement(5136812..5139789)	10.6563	-1.18597	-2.27517	0.0415252	0.999966	1	ENSMGAG00000004283
gene:ENSMGAG00000008135	Z	61078032..61181132	46.2071	-0.604911	-1.52088	0.0415338	0.999966	1	ENSMGAG00000008135
HELZ	20	complement(7862230..7919018)	4.01685	-0.654459	-1.57403	0.0415555	0.999966	1	ENSMGAG00000007422
F2RL3	30	complement(3602399..3603936)	0.99665	1.16697	2.2454	0.0416283	0.999966	1	ENSMGAG00000015746
USP35	1	complement(200871727..200887204)	5.84687	-0.850574	-1.80322	0.0416571	0.999966	1	ENSMGAG00000015251
gene:ENSMGAG00000003044	1	complement(1027901..1032872)	2.88231	-0.750912	-1.68286	0.0417153	0.999966	1	ENSMGAG00000003044
gene:ENSMGAG00000010136	11	19773359..19802757	7.36262	-0.710585	-1.63647	0.0418151	0.999966	1	ENSMGAG00000010136
MMP15	13	2566329..2570524	27.3833	0.552078	1.4662	0.0420789	0.999966	1	ENSMGAG00000003372
gene:ENSMGAG00000007723	21	8370603..8408172	3.91189	-0.641762	-1.56023	0.0420929	0.999966	1	ENSMGAG00000007723
IL16	12	complement(11995680..12023153)	0.743888	0.873571	1.83219	0.0421149	0.999966	1	ENSMGAG00000008064
SCN5A	6	5014491..5192324	0.929724	-0.773133	-1.70898	0.0421362	0.999966	1	ENSMGAG00000004453
PREX1	22	complement(6675261..6755832)	2.45813	-0.702254	-1.62704	0.0421384	0.999966	1	ENSMGAG00000004640
gene:ENSMGAG00000004801	15	10126211..10152810	0.147103	1.62217	3.07837	0.0424158	0.999966	1	ENSMGAG00000004801
RNF213	20	5511540..5545109	0.964522	-0.705844	-1.6311	0.0424467	0.999966	1	ENSMGAG00000006182
gene:ENSMGAG00000001137	27	complement(785043..789831)	0.654485	-1.66911	-3.18018	0.0425286	0.999966	1	ENSMGAG00000001137
gene:ENSMGAG00000015466	17	6464758..6467692	0.153438	1.65958	3.15925	0.0427599	0.999966	1	ENSMGAG00000015466
gene:ENSMGAG00000017212	1	202459011..202459973	0.0795761	5.27361	38.6825	0.0428702	0.999966	1	ENSMGAG00000017212
gene:ENSMGAG00000003459	28	2380530..2436855	1.89162	0.741201	1.67157	0.0428958	0.999966	1	ENSMGAG00000003459
CYP11A1	12	1843948..1849105	114.405	0.566428	1.48085	0.042988	0.999966	1	ENSMGAG00000002665
gene:ENSMGAG00000006794	3	34773552..34821535	1.20049	1.16124	2.23649	0.0430253	0.999966	1	ENSMGAG00000006794
VASH1	5	40446559..40451216	29.3125	0.674257	1.59577	0.0432437	0.999966	1	ENSMGAG00000012810
THBS2	2	42347377..42377403	30.2316	-0.56819	-1.48266	0.0432981	0.999966	1	ENSMGAG00000012225
SLC25A47	5	50569462..50577601	0.464603	-1.2227	-2.33383	0.0433716	0.999966	1	ENSMGAG00000013312
DNAJC13	6	43094629..43140820	7.43309	-0.601676	-1.51748	0.0436777	0.999966	1	ENSMGAG00000011478
gene:ENSMGAG00000001718	13	complement(1417296..1419424)	4.50532	0.806176	1.74857	0.0437646	0.999966	1	ENSMGAG00000001718
NCOA2	3	complement(66755777..66831025)	2.91201	-0.649432	-1.56855	0.0438841	0.999966	1	ENSMGAG00000011424
TNRC6A	16	7130266..7171439	2.76769	-0.62267	-1.53972	0.0441899	0.999966	1	ENSMGAG00000006455
gene:ENSMGAG00000016423	1	38039618..38060741	0.834175	-1.19546	-2.29017	0.0441915	0.999966	1	ENSMGAG00000016423
CLCN3	4	complement(5910013..5953887)	17.8258	-0.541106	-1.45509	0.0444062	0.999966	1	ENSMGAG00000002509
CCDC50	11	complement(13506159..13528423)	5.45809	-0.649478	-1.5686	0.0445212	0.999966	1	ENSMGAG00000007352
PTDSS1	3	77508267..77533106	22.2814	-0.610388	-1.52667	0.044677	0.999966	1	ENSMGAG00000012113
gene:ENSMGAG00000009718	10	complement(20432100..20434261)	0.0772707	2.40955	5.31309	0.0447637	0.999966	1	ENSMGAG00000009718
XPO4	1	186277236..186345502	13.8897	-0.574671	-1.48934	0.0454325	0.999966	1	ENSMGAG00000015128
CEMIP	12	complement(12139536..12186835)	1.56103	0.818044	1.76301	0.0454997	0.999966	1	ENSMGAG00000008100
DHCR24	10	complement(26064165..26070383)	42.3589	-0.582644	-1.49759	0.0455247	0.999966	1	ENSMGAG00000011421
gene:ENSMGAG00000006560	21	6927434..6937191	0.900979	1.30467	2.47027	0.0456595	0.999966	1	ENSMGAG00000006560
DHRS3	23	5530123..5554432	23.8548	0.698416	1.62272	0.0456982	0.999966	1	ENSMGAG00000005927
SECISBP2L	12	complement(10272910..10286066)	15.9384	-0.520699	-1.43465	0.0457363	0.999966	1	ENSMGAG00000007165
KCNJ2	20	complement(6875667..6882399)	8.69932	0.659574	1.57962	0.0459149	0.999966	1	ENSMGAG00000006648
gene:ENSMGAG00000008944	4	31132659..31179736	4.02861	-0.613422	-1.52988	0.0460932	0.999966	1	ENSMGAG00000008944
IRF2	4	20415446..20439614	24.2406	0.583334	1.49831	0.0463304	0.999966	1	ENSMGAG00000006359
KIRREL1	GL425552.1	737..6444	25.9497	0.620251	1.53714	0.0463686	0.999966	1	ENSMGAG00000005973
TMEM132C	17	complement(3961415..4009625)	5.37234	-0.676625	-1.5984	0.046386	0.999966	1	ENSMGAG00000002501
TYRP1	Z	32609685..32618905	0.0839226	-5.48695	-44.8473	0.0464045	0.999966	1	ENSMGAG00000005517
AGRP	13	1424113..1426583	0.0899045	3.35792	10.2526	0.0464293	0.999966	1	ENSMGAG00000001754
SYNJ1	1	111777998..111833741	1.72101	-0.703617	-1.62858	0.0464329	0.999966	1	ENSMGAG00000014522
DPY19L4	3	76981329..77003285	17.9969	-0.692799	-1.61642	0.0465346	0.999966	1	ENSMGAG00000012055
gene:ENSMGAG00000001186	GL424158.1	complement(27525..28455)	0.355165	1.85023	3.60559	0.0465531	0.999966	1	ENSMGAG00000001186
ILDR1	1	complement(87003140..87012496)	10.4119	-0.765762	-1.70027	0.046564	0.999966	1	ENSMGAG00000014326
FAM193B	15	complement(9794383..9800849)	0.336581	1.06414	2.09092	0.0466121	0.999966	1	ENSMGAG00000004078
FAM135B	3	complement(95288055..95351872)	0.0218921	-5.57103	-47.5387	0.0466837	0.999966	1	ENSMGAG00000012896
ST6GALNAC5	10	complement(20034077..20046181)	10.2106	-0.80977	-1.75293	0.0469147	0.999966	1	ENSMGAG00000009631
gene:ENSMGAG00000000938	14	149976..165132	6.30485	-0.717194	-1.64398	0.0469369	0.999966	1	ENSMGAG00000000938
ADPRHL1	1	144598941..144617631	0.102439	-2.36259	-5.14292	0.0470888	0.999966	1	ENSMGAG00000014848
HPS3	11	complement(24165546..24183066)	7.63228	-0.634019	-1.55188	0.0471374	0.999966	1	ENSMGAG00000011039
SLC26A5	1	complement(12910118..12975499)	11.8531	-0.584849	-1.49988	0.047164	0.999966	1	ENSMGAG00000006370
ACTC1	5	33516817..33521085	5.25711	0.80418	1.74615	0.0473426	0.999966	1	ENSMGAG00000012321
POGZ	27	857133..875660	4.46209	-0.710244	-1.63608	0.0473586	0.999966	1	ENSMGAG00000001193
gene:ENSMGAG00000015579	24	76937..77977	2.76884	-0.96202	-1.94804	0.0475358	0.999966	1	ENSMGAG00000015579
AK2	25	5044213..5048031	175.988	0.543166	1.45717	0.0475466	0.999966	1	ENSMGAG00000005006
NME8	6	complement(47156735..47175816)	0.0569612	3.01091	8.06072	0.0475664	0.999966	1	ENSMGAG00000011969
gene:ENSMGAG00000011774	6	45281879..45283713	5.4057	0.938493	1.91653	0.0476279	0.999966	1	ENSMGAG00000011774
MIEF1	1	50772125..50778786	2.2849	-0.793215	-1.73293	0.0478413	0.999966	1	ENSMGAG00000012384
CARMIL1	3	complement(39296275..39399429)	9.73968	-0.519279	-1.43324	0.0478858	0.999966	1	ENSMGAG00000007876
PPP2R2B	15	complement(17811919..17823888)	7.61238	0.695019	1.61891	0.0478919	0.999966	1	ENSMGAG00000009518
gene:ENSMGAG00000006852	22	complement(10576275..10606505)	4.54316	-0.700069	-1.62458	0.0479729	0.999966	1	ENSMGAG00000006852
TEKT1	21	complement(10302869..10313324)	30.5806	-0.659632	-1.57968	0.0479778	0.999966	1	ENSMGAG00000008815
OXTR	14	complement(20170078..20180203)	0.283634	1.45404	2.73975	0.0480526	0.999966	1	ENSMGAG00000010127
HAGH	16	complement(6339504..6350210)	39.2163	0.535391	1.44934	0.0481808	0.999966	1	ENSMGAG00000005534
gene:ENSMGAG00000017144	GL429621.1	4..1335	0.318181	1.47946	2.78845	0.0482523	0.999966	1	ENSMGAG00000017144
NSDHL	9	complement(11101826..11109929)	65.8841	-0.514559	-1.42856	0.0482597	0.999966	1	ENSMGAG00000005409
PLEKHG1	2	49839353..49888813	8.83298	-0.523017	-1.43696	0.0483629	0.999966	1	ENSMGAG00000012651
ARRDC4	12	16456675..16461436	11.732	-0.705216	-1.63039	0.0484637	0.999966	1	ENSMGAG00000009134
OPCML	26	complement(2192549..2480380)	0.163011	1.49335	2.81542	0.0484786	0.999966	1	ENSMGAG00000001427
KCNQ3	3	complement(92373880..92405996)	0.216456	1.32637	2.50771	0.0487127	0.999966	1	ENSMGAG00000012831
gene:ENSMGAG00000008817	GL428204.1	2539..4642	34.0565	-0.68572	-1.6085	0.0487923	0.999966	1	ENSMGAG00000008817
LANCL3	1	complement(120469900..120473275)	0.841877	1.17874	2.2638	0.0489443	0.999966	1	ENSMGAG00000014625
gene:ENSMGAG00000016862	15	1757362..1760393	9.99469	0.786258	1.7246	0.0490665	0.999966	1	ENSMGAG00000016862
CRTAC1	8	24525160..24530283	2.44639	0.757587	1.69066	0.0492026	0.999966	1	ENSMGAG00000009664
gene:ENSMGAG00000016383	GL425200.1	complement(165..520)	1.40537	1.34012	2.53172	0.0492991	0.999966	1	ENSMGAG00000016383
SLC19A2	1	87471836..87484520	2.9133	-0.811374	-1.75488	0.049607	0.999966	1	ENSMGAG00000014345
NCAM1	26	complement(6151710..6193006)	7.47522	0.879381	1.83959	0.0497345	0.999966	1	ENSMGAG00000004316
MOXD1	2	58897635..58936847	14.7811	0.773367	1.70925	0.0499063	0.999966	1	ENSMGAG00000013142
gene:ENSMGAG00000005425	28	complement(3773622..3778544)	13.7892	-0.66692	-1.58768	0.0503574	0.999966	1	ENSMGAG00000005425
gene:ENSMGAG00000015813	5	25686135..25687568	3.01096	-0.853461	-1.80683	0.0504435	0.999966	1	ENSMGAG00000015813
gene:ENSMGAG00000006834	16	7629091..7633034	0.0713155	5.01087	32.242	0.0504577	0.999966	1	ENSMGAG00000006834
gene:ENSMGAG00000007730	GL426556.1	474..1016	30.6617	0.653179	1.57263	0.0505239	0.999966	1	ENSMGAG00000007730
DHX57	2	complement(16368987..16387060)	1.44775	-0.699982	-1.62448	0.0505439	0.999966	1	ENSMGAG00000007437
WDR44	9	2786136..2807449	9.76765	-0.536076	-1.45002	0.0505455	0.999966	1	ENSMGAG00000002717
gene:ENSMGAG00000011756	8	35983930..36173022	2.37295	-0.705481	-1.63069	0.0505529	0.999966	1	ENSMGAG00000011756
GNS	1	complement(35481671..35498013)	351.247	-0.604968	-1.52095	0.0505895	0.999966	1	ENSMGAG00000010289
SOX9	20	complement(6232311..6234528)	15.0145	0.716115	1.64275	0.0507075	0.999966	1	ENSMGAG00000006638
gene:ENSMGAG00000003266	Z	complement(358220..359815)	0.722686	1.22635	2.33975	0.0508304	0.999966	1	ENSMGAG00000003266
RAB36	17	complement(9073562..9082114)	0.0892956	3.36588	10.3093	0.0508836	0.999966	1	ENSMGAG00000008050
gene:ENSMGAG00000006101	GL425619.1	397..1762	115.096	0.541213	1.4552	0.0509162	0.999966	1	ENSMGAG00000006101
gene:ENSMGAG00000008796	17	9860665..9861880	0.170515	-3.19613	-9.16495	0.0509639	0.999966	1	ENSMGAG00000008796
gene:ENSMGAG00000001923	30	1680534..1684741	43.2928	0.539573	1.45354	0.0510056	0.999966	1	ENSMGAG00000001923
FAM83C	22	1382642..1406432	1.17131	-0.965807	-1.95316	0.0510848	0.999966	1	ENSMGAG00000001956
gene:ENSMGAG00000002979	4	complement(10041504..10072678)	0.254097	1.65115	3.14084	0.0512449	0.999966	1	ENSMGAG00000002979
TCN2	1	complement(95817693..95819753)	40.5307	0.548628	1.46269	0.0512529	0.999966	1	ENSMGAG00000014420
RHOBTB2	24	complement(1339614..1343810)	13.8786	0.605948	1.52198	0.0514337	0.999966	1	ENSMGAG00000001388
TNK2	11	14908414..14919096	3.16933	0.728111	1.65647	0.0514961	0.999966	1	ENSMGAG00000007803
gene:ENSMGAG00000003101	1	1055785..1062484	1.08151	-1.18711	-2.27696	0.0515387	0.999966	1	ENSMGAG00000003101
GALNT18	5	8069647..8177673	24.5845	-0.551901	-1.46602	0.0516592	0.999966	1	ENSMGAG00000005796
ACSF2	20	complement(10431372..10460463)	27.4162	0.492303	1.40669	0.0517274	0.999966	1	ENSMGAG00000009074
HPGDS	4	complement(17882438..17917352)	660.065	0.668784	1.58973	0.0517669	0.999966	1	ENSMGAG00000005610
gene:ENSMGAG00000009629	GL427119.1	complement(1..4264)	4.62048	0.854501	1.80813	0.0518579	0.999966	1	ENSMGAG00000009629
CGN	27	884709..892989	3.97029	-0.765527	-1.69999	0.0519867	0.999966	1	ENSMGAG00000001250
gene:ENSMGAG00000010300	6	complement(30448202..30455928)	0.0572812	5.15264	35.5714	0.0520471	0.999966	1	ENSMGAG00000010300
TMEM132D	17	3659274..3841918	1.51842	-0.747336	-1.67869	0.052246	0.999966	1	ENSMGAG00000002439
ADARB2	6	complement(10255547..10355393)	0.030708	5.06308	33.4301	0.0525837	0.999966	1	ENSMGAG00000005556
OR51E2	1	202463974..202464930	0.0686357	5.06308	33.4301	0.0526012	0.999966	1	ENSMGAG00000010773
SLC1A6	30	546267..556234	9.53133	0.902075	1.86875	0.0527124	0.999966	1	ENSMGAG00000000763
COLEC11	2	98529538..98549338	0.893922	1.15802	2.2315	0.0527558	0.999966	1	ENSMGAG00000013980
ATR	11	complement(10217465..10255177)	1.35658	-0.710644	-1.63653	0.0528191	0.999966	1	ENSMGAG00000006227
GBF1	8	complement(16542440..16589817)	6.17389	-0.650195	-1.56938	0.0529596	0.999966	1	ENSMGAG00000007097
EFCAB2	2	complement(35245330..35254964)	169.529	-0.856755	-1.81096	0.0529606	0.999966	1	ENSMGAG00000011423
gene:ENSMGAG00000016662	22	12416437..12421179	19.5114	0.71632	1.64299	0.0529815	0.999966	1	ENSMGAG00000016662
ARHGAP40	22	complement(4349984..4485762)	12.5803	-0.759628	-1.69305	0.0530297	0.999966	1	ENSMGAG00000002928
PDIA5	7	28234261..28292564	54.9713	0.563549	1.4779	0.0532252	0.999966	1	ENSMGAG00000012032
gene:ENSMGAG00000001001	10	421990..443742	0.20195	1.94343	3.84618	0.053301	0.999966	1	ENSMGAG00000001001
GAD1	7	complement(18906270..19024090)	0.0287755	-5.42166	-42.863	0.053314	0.999966	1	ENSMGAG00000010185
VLDLR	Z	complement(29016297..29020716)	160.359	-0.568857	-1.48335	0.0533755	0.999966	1	ENSMGAG00000003673
GRIP2	14	complement(11582447..11630494)	0.741628	-0.854665	-1.80834	0.0536094	0.999966	1	ENSMGAG00000007781
SCARF1	21	complement(5735286..5739768)	8.64496	0.657343	1.57718	0.0537131	0.999966	1	ENSMGAG00000005116
gene:ENSMGAG00000004006	12	3317090..3336345	0.918401	-0.793782	-1.73361	0.0539675	0.999966	1	ENSMGAG00000004006
gene:ENSMGAG00000007247	7	11318203..11320522	0.331129	-1.68598	-3.2176	0.0539909	0.999966	1	ENSMGAG00000007247
MOS	3	complement(61183051..61184094)	0.0476134	4.71201	26.2093	0.0541033	0.999966	1	ENSMGAG00000011001
CCDC180	19	complement(7017349..7033859)	0.017349	2.78545	6.8945	0.054376	0.999966	1	ENSMGAG00000006338
RGS8	10	complement(5257153..5268688)	0.0951232	4.81546	28.1577	0.0545	0.999966	1	ENSMGAG00000003381
AEBP1	GL424282.1	48..4534	27.7756	0.548075	1.46213	0.0548196	0.999966	1	ENSMGAG00000001647
ARHGAP32	26	complement(1205630..1218944)	4.82809	-0.660081	-1.58017	0.054985	0.999966	1	ENSMGAG00000001005
SOX18	22	10287732..10288589	1.49211	0.991786	1.98865	0.0550774	0.999966	1	ENSMGAG00000006624
gene:ENSMGAG00000007161	Z	complement(56296922..56337105)	1.65224	-0.766854	-1.70156	0.055104	0.999966	1	ENSMGAG00000007161
R3HDM1	7	32330062..32371114	14.8184	-0.557889	-1.47211	0.0551731	0.999966	1	ENSMGAG00000012461
gene:ENSMGAG00000016460	1	195584520..195594214	0.33514	1.54095	2.90986	0.0552376	0.999966	1	ENSMGAG00000016460
NKAIN1	25	complement(397326..415312)	0.515829	-1.4939	-2.81649	0.0552551	0.999966	1	ENSMGAG00000000756
gene:ENSMGAG00000017297	30	complement(754477..756350)	0.163974	4.71191	26.2076	0.0553913	0.999966	1	ENSMGAG00000017297
gene:ENSMGAG00000011591	5	26787588..26798051	0.152541	1.57888	2.98739	0.0554539	0.999966	1	ENSMGAG00000011591
HHEX	8	complement(22914347..22916011)	9.0005	0.851901	1.80488	0.0557271	0.999966	1	ENSMGAG00000009052
ZP1	5	complement(6590530..6594670)	119.378	0.700179	1.62471	0.0558212	0.999966	1	ENSMGAG00000003226
KIF20A	15	complement(9660652..9669942)	25.6093	-0.534484	-1.44842	0.0558279	0.999966	1	ENSMGAG00000003923
gene:ENSMGAG00000004701	5	complement(60197200..60200651)	25.1528	0.610892	1.5272	0.0559691	0.999966	1	ENSMGAG00000004701
WEE1	5	complement(9046786..9051982)	95.0386	-0.559352	-1.47361	0.0560427	0.999966	1	ENSMGAG00000006185
gene:ENSMGAG00000007987	GL427353.1	468..2411	3.91382	0.937012	1.91456	0.0561121	0.999966	1	ENSMGAG00000007987
BACE2	1	114604932..114630861	21.473	-0.727673	-1.65597	0.0561701	0.999966	1	ENSMGAG00000014564
OXSM	6	38830472..38834617	4.33687	-0.676681	-1.59846	0.0562661	0.999966	1	ENSMGAG00000011111
gene:ENSMGAG00000000786	26	217059..221743	0.274954	1.45874	2.74868	0.0563158	0.999966	1	ENSMGAG00000000786
CCR6	2	complement(43494076..43495255)	0.358715	1.36428	2.57449	0.0564519	0.999966	1	ENSMGAG00000015842
gene:ENSMGAG00000007131	11	12859026..12859745	0.116998	-5.24648	-37.9618	0.0565339	0.999966	1	ENSMGAG00000007131
ADD2	GL429737.1	complement(42130..46478)	2.8981	1.03995	2.05616	0.0566105	0.999966	1	ENSMGAG00000003091
ITGB4	20	complement(4725670..4745778)	2.64517	-0.664491	-1.58501	0.0566861	0.999966	1	ENSMGAG00000004816
GGPS1	2	complement(38844673..38855684)	16.3605	0.671053	1.59223	0.056694	0.999966	1	ENSMGAG00000011893
SELENOI	2	110473918..110482716	9.36043	-0.752549	-1.68477	0.0568679	0.999966	1	ENSMGAG00000014102
MYOM2	2	complement(95265409..95362385)	0.0477769	1.98897	3.96953	0.0570633	0.999966	1	ENSMGAG00000013950
gene:ENSMGAG00000017321	17	8287024..8289452	22.568	1.46513	2.76089	0.0571033	0.999966	1	ENSMGAG00000017321
KPNA2	20	8098475..8103307	261.816	-0.647602	-1.56656	0.0571425	0.999966	1	ENSMGAG00000007585
FKBP10	29	4139989..4143119	20.1478	0.595646	1.51115	0.0572198	0.999966	1	ENSMGAG00000006992
USP12	1	183854328..183876974	3.06216	0.760935	1.69459	0.0572339	0.999966	1	ENSMGAG00000015106
FAM91A1	3	88875656..88899333	14.4854	-0.590206	-1.50546	0.0574473	0.999966	1	ENSMGAG00000012639
gene:ENSMGAG00000016744	29	complement(4183818..4188189)	1.14831	1.02934	2.04109	0.0574693	0.999966	1	ENSMGAG00000016744
MTNR1B	1	complement(194218291..194240727)	0.617497	-1.09922	-2.14238	0.057492	0.999966	1	ENSMGAG00000015623
OGDHL	8	complement(5074682..5122406)	3.10285	-0.728058	-1.65641	0.0575509	0.999966	1	ENSMGAG00000002206
gene:ENSMGAG00000013050	1	complement(80052367..80088579)	0.0139438	-3.1044	-8.6004	0.0575955	0.999966	1	ENSMGAG00000013050
PRKD3	2	complement(34138957..34178607)	0.63657	-1.04	-2.05623	0.0576189	0.999966	1	ENSMGAG00000011300
MTMR4	21	complement(618445..687122)	22.5782	-0.610396	-1.52668	0.0576319	0.999966	1	ENSMGAG00000001992
gene:ENSMGAG00000002804	GL424557.1	57715..58568	11.2187	0.946316	1.92695	0.0576722	0.999966	1	ENSMGAG00000002804
HDAC1	25	complement(4821997..4831115)	31.3346	-0.504626	-1.41876	0.0576798	0.999966	1	ENSMGAG00000004647
ABHD2	12	complement(12911223..12935028)	6.94169	-0.716047	-1.64268	0.0577653	0.999966	1	ENSMGAG00000008638
gene:ENSMGAG00000006670	13	13948687..13954429	0.0806765	4.81128	28.0763	0.0580498	0.999966	1	ENSMGAG00000006670
SCARA5	2	110593659..110611811	15.6334	0.597434	1.51302	0.0580542	0.999966	1	ENSMGAG00000014119
gene:ENSMGAG00000011584	8	34310533..34322750	0.172763	1.50164	2.83165	0.0582337	0.999966	1	ENSMGAG00000011584
PGM5	Z	complement(27945334..27992453)	14.8157	0.605414	1.52142	0.0582565	0.999966	1	ENSMGAG00000017142
HOGA1	8	complement(24558421..24560855)	0.0593572	-5.24742	-37.9865	0.0582995	0.999966	1	ENSMGAG00000009750
YJEFN3	GL427223.1	38..1559	0.164015	2.32363	5.0059	0.0584641	0.999966	1	ENSMGAG00000007833
ABCB9	17	5421394..5433708	5.41693	-0.738412	-1.66834	0.0585065	0.999966	1	ENSMGAG00000003541
SLC5A9	10	23513573..23533879	0.136605	-1.81355	-3.51506	0.0588048	0.999966	1	ENSMGAG00000010829
gene:ENSMGAG00000004210	20	4469373..4473375	0.092196	-2.22379	-4.67119	0.058882	0.999966	1	ENSMGAG00000004210
MFAP3	15	complement(11797718..11807723)	13.9716	-0.514543	-1.42854	0.0590411	0.999966	1	ENSMGAG00000005793
gene:ENSMGAG00000000673	27	complement(255359..256955)	0.211814	2.0647	4.18348	0.059146	0.999966	1	ENSMGAG00000000673
SYTL2	1	complement(198345917..198387694)	6.20881	-0.615658	-1.53226	0.059206	0.999966	1	ENSMGAG00000015237
P4HTM	14	complement(12222486..12234395)	29.9761	0.521548	1.43549	0.0592859	0.999966	1	ENSMGAG00000008559
gene:ENSMGAG00000016641	1	complement(145382902..145388947)	0.179417	1.79734	3.47578	0.0594606	0.999966	1	ENSMGAG00000016641
PLCXD3	Z	complement(13842109..13879072)	1.34826	1.28704	2.44026	0.0599883	0.999966	1	ENSMGAG00000003582
gene:ENSMGAG00000009537	GL428891.1	116640..154250	1.77685	-0.640859	-1.55926	0.0601853	0.999966	1	ENSMGAG00000009537
PI4KA	17	120107..175948	6.52059	-0.508498	-1.42257	0.0602841	0.999966	1	ENSMGAG00000000844
RBP5	1	complement(81059859..81061388)	46.9562	0.561974	1.47629	0.0607143	0.999966	1	ENSMGAG00000014156
gene:ENSMGAG00000000945	22	complement(468999..475019)	305.267	0.540076	1.45405	0.0608478	0.999966	1	ENSMGAG00000000945
gene:ENSMGAG00000016366	3	27978815..27991111	9.98425	-0.709761	-1.63553	0.0609421	0.999966	1	ENSMGAG00000016366
KAZALD1	8	complement(25305029..25307355)	49.4919	0.583021	1.49798	0.060947	0.999966	1	ENSMGAG00000010203
DAB2IP	19	8583484..8609845	6.17535	-0.568083	-1.48255	0.0609734	0.999966	1	ENSMGAG00000007886
gene:ENSMGAG00000002722	17	complement(4894658..4902623)	6.6197	-0.691709	-1.6152	0.0610703	0.999966	1	ENSMGAG00000002722
gene:ENSMGAG00000001588	6	298764..301400	7.14547	0.780681	1.71794	0.0611103	0.999966	1	ENSMGAG00000001588
TLR4	19	3636855..3642302	5.00135	-0.697838	-1.62207	0.0611587	0.999966	1	ENSMGAG00000005422
ARHGEF11	2	complement(111303708..111317915)	0.595674	0.773374	1.70926	0.0612187	0.999966	1	ENSMGAG00000014176
LRRC3B	6	39287277..39289098	0.900016	1.40212	2.6429	0.0613265	0.999966	1	ENSMGAG00000016442
SCUBE2	5	9224214..9257844	10.5326	-0.709405	-1.63513	0.0613821	0.999966	1	ENSMGAG00000006324
IRF4	3	13790856..13804585	3.48664	0.858287	1.81288	0.061388	0.999966	1	ENSMGAG00000004406
HTRA2	5	59568414..59573754	18.7024	0.585231	1.50028	0.0614733	0.999966	1	ENSMGAG00000010465
CEP85	25	complement(35636..46406)	12.5029	-0.599714	-1.51542	0.0614843	0.999966	1	ENSMGAG00000000692
SLC45A4	3	complement(97151887..97183007)	1.15781	-0.794001	-1.73388	0.061594	0.999966	1	ENSMGAG00000012969
PDCD11	8	25956747..25979806	4.74759	-0.584369	-1.49938	0.0616007	0.999966	1	ENSMGAG00000010482
ISM1	2	complement(12348616..12367244)	0.495632	-1.09835	-2.1411	0.0618071	0.999966	1	ENSMGAG00000006078
RPAP1	5	complement(25618759..25651194)	5.7996	-0.613767	-1.53025	0.0618229	0.999966	1	ENSMGAG00000011235
gene:ENSMGAG00000008732	4	31064514..31065219	0.317523	1.72534	3.30657	0.0619771	0.999966	1	ENSMGAG00000008732
gene:ENSMGAG00000010880	5	24098465..24144024	9.11681	-0.473626	-1.38859	0.0620032	0.999966	1	ENSMGAG00000010880
gene:ENSMGAG00000016752	2	complement(70619882..70626523)	3.44291	-0.802515	-1.74414	0.0621943	0.999966	1	ENSMGAG00000016752
gene:ENSMGAG00000003784	24	4151640..4158654	2.4543	0.742346	1.67289	0.0622067	0.999966	1	ENSMGAG00000003784
TAS1R3	23	complement(2393557..2397869)	0.363119	-1.05356	-2.07565	0.0622847	0.999966	1	ENSMGAG00000002988
gene:ENSMGAG00000004256	21	4872588..4883067	12.1014	-0.487658	-1.40217	0.0623077	0.999966	1	ENSMGAG00000004256
RAB39A	1	complement(188037194..188037631)	0.483499	1.70402	3.25809	0.0624582	0.999966	1	ENSMGAG00000015613
RSAD2	2	99846537..99851251	1.1292	-1.11627	-2.16785	0.0625052	0.999966	1	ENSMGAG00000013983
DOPEY2	1	complement(110158574..110200486)	3.16644	-0.598923	-1.51459	0.0627756	0.999966	1	ENSMGAG00000014540
ELFN1	16	2735484..2737850	0.53159	1.6771	3.19784	0.0628405	0.999966	1	ENSMGAG00000015533
C7	Z	13736527..13757599	12.0471	0.815277	1.75964	0.0628514	0.999966	1	ENSMGAG00000005390
LPP	11	complement(14238722..14562015)	6.67331	0.61636	1.533	0.0628973	0.999966	1	ENSMGAG00000007571
SURF6	19	complement(7036087..7038667)	20.4125	0.577293	1.49205	0.0629458	0.999966	1	ENSMGAG00000006371
ERN1	20	8299745..8322256	11.3273	-0.517957	-1.43193	0.0630359	0.999966	1	ENSMGAG00000007831
AREG	4	25836990..25840944	9.65518	-0.716849	-1.64359	0.0630497	0.999966	1	ENSMGAG00000007140
TTC17	5	21976596..22014930	18.9743	-0.501927	-1.4161	0.0630784	0.999966	1	ENSMGAG00000010440
SEMA3F	14	3179063..3194793	22.4462	0.50896	1.42302	0.063234	0.999966	1	ENSMGAG00000004057
gene:ENSMGAG00000016491	1	92889360..92905231	0.829656	1.16943	2.24923	0.0633349	0.999966	1	ENSMGAG00000016491
gene:ENSMGAG00000006286	GL425629.1	complement(4..1558)	32.7556	0.612513	1.52892	0.0633436	0.999966	1	ENSMGAG00000006286
PTPRR	1	complement(37662682..37731864)	0.287718	-1.20149	-2.29978	0.063344	0.999966	1	ENSMGAG00000010655
PHEX	1	complement(126085718..126180964)	0.713739	1.03514	2.04931	0.0633493	0.999966	1	ENSMGAG00000014656
gene:ENSMGAG00000007582	16	8018239..8040821	30.8258	-0.544016	-1.45803	0.0634611	0.999966	1	ENSMGAG00000007582
IFT122	14	20373121..20404073	13.2332	-0.528531	-1.44246	0.0637196	0.999966	1	ENSMGAG00000010263
GPM6B	1	131061747..131072620	87.3559	-0.50657	-1.42067	0.0637764	0.999966	1	ENSMGAG00000014700
OLFML2B	10	7196481..7205111	52.001	0.526479	1.44041	0.0638282	0.999966	1	ENSMGAG00000005162
gene:ENSMGAG00000009088	10	17266277..17334083	0.0150708	1.96238	3.89704	0.0638967	0.999966	1	ENSMGAG00000009088
KIF26A	5	52844349..52909022	0.851284	0.790632	1.72983	0.0639509	0.999966	1	ENSMGAG00000013441
gene:ENSMGAG00000003834	GL424725.1	complement(19242..22708)	1.91813	0.816116	1.76066	0.0640523	0.999966	1	ENSMGAG00000003834
SHC1	GL424577.1	complement(15538..19632)	39.6273	0.481818	1.3965	0.0640974	0.999966	1	ENSMGAG00000003152
CHD6	22	complement(734708..777134)	1.68573	-0.647172	-1.5661	0.0641134	0.999966	1	ENSMGAG00000001121
TANC1	7	38525991..38572903	3.18701	-0.543788	-1.4578	0.0641189	0.999966	1	ENSMGAG00000012945
PSEN1	5	complement(27205100..27224657)	4.97431	-0.592962	-1.50834	0.0642756	0.999966	1	ENSMGAG00000011694
SNX33	GL424608.1	21623..25648	14.0307	0.550954	1.46505	0.0643036	0.999966	1	ENSMGAG00000002897
ROPN1L	3	complement(27291698..27297896)	3.67288	1.00036	2.0005	0.064304	0.999966	1	ENSMGAG00000006020
NUP210L	2	57995847..58014648	0.27457	1.0048	2.00667	0.0643773	0.999966	1	ENSMGAG00000013101
PRRX2	19	5784328..5798250	0.623648	1.0537	2.07585	0.0644026	0.999966	1	ENSMGAG00000005003
LDB2	4	59552355..59771895	8.21433	0.704848	1.62997	0.0644219	0.999966	1	ENSMGAG00000012591
TAF4B	3	53691673..53747411	35.4274	-0.513647	-1.42765	0.0646622	0.999966	1	ENSMGAG00000010380
gene:ENSMGAG00000011571	6	complement(43711434..43712504)	2.87604	0.869517	1.82705	0.0646738	0.999966	1	ENSMGAG00000011571
gene:ENSMGAG00000016823	1	21361001..21362628	0.284522	1.92369	3.79391	0.0646898	0.999966	1	ENSMGAG00000016823
DENND3	3	97103650..97140970	6.55208	-0.62852	-1.54598	0.0646983	0.999966	1	ENSMGAG00000012966
MTOR	23	complement(4303732..4363808)	1.77997	-0.627093	-1.54445	0.0647992	0.999966	1	ENSMGAG00000004758
AGRN	23	complement(2401883..2849562)	3.32686	-0.603584	-1.51949	0.0648551	0.999966	1	ENSMGAG00000003375
ENTPD5	5	complement(39209595..39222515)	11.7914	0.557958	1.47218	0.0649715	0.999966	1	ENSMGAG00000012613
gene:ENSMGAG00000017157	19	complement(47497..50465)	7.50412	0.638132	1.55631	0.0650573	0.999966	1	ENSMGAG00000017157
gene:ENSMGAG00000007029	8	complement(14333475..14335135)	17.3465	0.627519	1.54491	0.065187	0.999966	1	ENSMGAG00000007029
CNDP2	3	complement(41311170..41325452)	426.644	-0.536439	-1.45039	0.0652084	0.999966	1	ENSMGAG00000008157
SLC45A2	Z	complement(10778022..10791176)	0.0324468	4.52712	23.0568	0.0652472	0.999966	1	ENSMGAG00000017043
MAP3K4	2	complement(46421266..46474179)	3.74241	-0.536463	-1.45041	0.0652746	0.999966	1	ENSMGAG00000012360
gene:ENSMGAG00000013229	4	complement(72721204..72722573)	0.123572	4.5275	23.0628	0.0652815	0.999966	1	ENSMGAG00000013229
GMNC	11	13660756..13662405	0.0970411	-5.22056	-37.2858	0.0653005	0.999966	1	ENSMGAG00000007410
PIK3CB	11	complement(5108419..5157535)	5.85159	-0.603495	-1.51939	0.0653297	0.999966	1	ENSMGAG00000004296
SLC23A1	15	1723478..1726015	0.0418321	3.19841	9.17948	0.0654834	0.999966	1	ENSMGAG00000001277
UNC13D	20	4656264..4665524	4.68279	-0.660486	-1.58061	0.0656198	0.999966	1	ENSMGAG00000004664
RBBP5	28	1906885..1916170	40.0131	-0.465649	-1.38094	0.0658401	0.999966	1	ENSMGAG00000001045
MPEG1	5	complement(17107874..17109994)	40.1009	-0.717541	-1.64438	0.0659916	0.999966	1	ENSMGAG00000015790
gene:ENSMGAG00000001530	29	1995414..2009674	1.11884	0.822337	1.76827	0.0660263	0.999966	1	ENSMGAG00000001530
C1QTNF7	4	complement(60149777..60152859)	0.467582	1.28737	2.44083	0.0661855	0.999966	1	ENSMGAG00000012661
PLEKHH1	5	29846870..29890675	3.27423	-0.616596	-1.53325	0.0662302	0.999966	1	ENSMGAG00000011911
VIPR2	6	complement(9415435..9461021)	20.515	0.591341	1.50665	0.0663359	0.999966	1	ENSMGAG00000005280
ANK1	24	complement(2783214..2804617)	4.86316	1.0078	2.01084	0.0663459	0.999966	1	ENSMGAG00000003283
gene:ENSMGAG00000014219	1	complement(81835380..81839110)	0.113998	2.58151	5.98565	0.0664215	0.999966	1	ENSMGAG00000014219
GATM	12	10790552..10803316	0.0690872	2.31326	4.97005	0.0665565	0.999966	1	ENSMGAG00000007552
gene:ENSMGAG00000009612	7	complement(16308790..16368115)	0.0868469	1.91015	3.75848	0.0666177	0.999966	1	ENSMGAG00000009612
PTGER2	5	60994601..60999044	4.49053	0.801624	1.74306	0.0667833	0.999966	1	ENSMGAG00000013782
HYAL2	14	complement(1391373..1393282)	18.5597	0.609905	1.52616	0.0672527	0.999966	1	ENSMGAG00000001424
gene:ENSMGAG00000014281	2	115800681..115806858	0.0204278	2.39942	5.2759	0.0672915	0.999966	1	ENSMGAG00000014281
PRLR	Z	complement(11065687..11087562)	4.64028	-0.748205	-1.6797	0.0673053	0.999966	1	ENSMGAG00000003018
PIK3C2G	1	65609210..65802164	0.178926	1.23569	2.35493	0.0673875	0.999966	1	ENSMGAG00000013577
S100A10	2	complement(57236092..57236639)	284.716	0.51957	1.43353	0.0674734	0.999966	1	ENSMGAG00000013077
KCNS1	22	5457196..5462357	0.138043	1.87901	3.67822	0.0675515	0.999966	1	ENSMGAG00000003530
PENK	3	complement(61333857..61340088)	1.95894	1.166	2.24388	0.0676499	0.999966	1	ENSMGAG00000011027
TTLL5	5	39914804..40006875	11.9588	-0.540512	-1.45449	0.0677017	0.999966	1	ENSMGAG00000012764
SLC47A2	21	complement(7170117..7175266)	0.0783358	2.15049	4.43979	0.0677586	0.999966	1	ENSMGAG00000006906
COL12A1	2	84538200..84635508	2.60756	0.881731	1.84258	0.0677611	0.999966	1	ENSMGAG00000013799
gene:ENSMGAG00000000850	30	428860..435868	3.6699	0.68405	1.60664	0.0678024	0.999966	1	ENSMGAG00000000850
gene:ENSMGAG00000008597	GL428176.1	complement(103..12273)	0.997564	-0.860269	-1.81538	0.0678591	0.999966	1	ENSMGAG00000008597
VPS8	11	2966281..3016505	15.7028	-0.534525	-1.44846	0.0678733	0.999966	1	ENSMGAG00000002209
GMFB	5	59013397..59022849	62.2672	-0.425315	-1.34287	0.0679064	0.999966	1	ENSMGAG00000013693
WDR36	Z	complement(49277319..49307370)	19.2139	-0.487785	-1.40229	0.0679391	0.999966	1	ENSMGAG00000006803
DEUP1	1	complement(193987225..194025349)	0.0357047	-5.05857	-33.3258	0.068018	0.999966	1	ENSMGAG00000015214
ZNF451	2	complement(91107267..91131367)	16.6995	-0.52903	-1.44296	0.0682866	0.999966	1	ENSMGAG00000013888
gene:ENSMGAG00000012782	7	complement(36037666..36069797)	0.0102093	4.70074	26.0053	0.0683231	0.999966	1	ENSMGAG00000012782
NRSN2	22	complement(10809439..10810703)	0.111776	3.17412	9.02624	0.0683415	0.999966	1	ENSMGAG00000007065
ATXN2	17	complement(6347291..6390537)	43.4306	-0.440631	-1.3572	0.0683834	0.999966	1	ENSMGAG00000005288
FAM19A5	1	17541281..17541582	1.08786	1.50597	2.84016	0.0684171	0.999966	1	ENSMGAG00000007775
RNF145	15	10227246..10258057	61.1526	-0.444542	-1.36088	0.0686438	0.999966	1	ENSMGAG00000004866
gene:ENSMGAG00000002121	19	1754832..1782763	20.6252	-0.514016	-1.42802	0.0686539	0.999966	1	ENSMGAG00000002121
ADGRD2	19	9439228..9458050	0.283519	1.23845	2.35946	0.0689136	0.999966	1	ENSMGAG00000008260
gene:ENSMGAG00000004522	17	5901328..5904279	177.389	0.510497	1.42454	0.0689161	0.999966	1	ENSMGAG00000004522
gene:ENSMGAG00000016807	Z	13958623..13976069	8.39119	-0.638321	-1.55652	0.0689474	0.999966	1	ENSMGAG00000016807
RECQL5	20	4783509..4819745	8.92457	-0.617094	-1.53378	0.0690111	0.999966	1	ENSMGAG00000004920
SEC24A	15	complement(15561785..15577135)	36.3815	-0.419879	-1.33782	0.0692148	0.999966	1	ENSMGAG00000008295
INHA	7	complement(23207219..23210909)	0.634932	-1.10203	-2.14656	0.0692775	0.999966	1	ENSMGAG00000011220
SCD	8	complement(19619497..19635407)	26.6217	-0.618362	-1.53513	0.0692881	0.999966	1	ENSMGAG00000007446
CCDC3	1	8351949..8388153	4.28033	0.909867	1.87887	0.0693259	0.999966	1	ENSMGAG00000004919
MRAP2	2	complement(80951537..80962219)	0.0633677	4.62327	24.6457	0.0694403	0.999966	1	ENSMGAG00000013723
C1QTNF6	1	complement(49940745..49942864)	5.5978	-0.69748	-1.62167	0.0694671	0.999966	1	ENSMGAG00000012645
GDPD1	21	7527667..7535167	5.23638	-0.722004	-1.64947	0.0694765	0.999966	1	ENSMGAG00000007212
MOCOS	3	complement(34001786..34127945)	2.30506	-0.653857	-1.57337	0.0697467	0.999966	1	ENSMGAG00000006783
HMG20A	12	complement(2182504..2218951)	17.5662	-0.52063	-1.43458	0.0698696	0.999966	1	ENSMGAG00000003179
FSHR	2	complement(10014116..10089524)	26.4443	-0.492178	-1.40657	0.0698751	0.999966	1	ENSMGAG00000005711
SNX21	22	11377452..11378459	32.5187	0.591432	1.50674	0.0700798	0.999966	1	ENSMGAG00000008163
gene:ENSMGAG00000016576	5	complement(469412..492578)	0.141187	1.5958	3.02262	0.0701155	0.999966	1	ENSMGAG00000016576
GFRA2	24	1445417..1454248	0.736095	1.17593	2.25938	0.0702153	0.999966	1	ENSMGAG00000001766
gene:ENSMGAG00000016792	14	18818376..18827703	2.30862	1.03631	2.05097	0.0702275	0.999966	1	ENSMGAG00000016792
LSM14B	22	8476381..8483031	49.5445	-0.556434	-1.47063	0.0702441	0.999966	1	ENSMGAG00000005300
MYL4	29	2202422..2207443	77.1687	0.482787	1.39744	0.070372	0.999966	1	ENSMGAG00000001941
gene:ENSMGAG00000014237	1	82650625..82694737	0.0167293	4.52712	23.0568	0.0704843	0.999966	1	ENSMGAG00000014237
HMX3	8	34402705..34403588	0.0583344	4.52712	23.0568	0.0705255	0.999966	1	ENSMGAG00000011613
gene:ENSMGAG00000013788	1	complement(119390941..119426958)	0.107747	1.84997	3.60491	0.0705591	0.999966	1	ENSMGAG00000013788
PLEKHG5	23	567559..577606	1.04067	0.78741	1.72597	0.0706497	0.999966	1	ENSMGAG00000001336
P3H4	GL425207.1	complement(934..1794)	40.6124	0.548053	1.46211	0.0706618	0.999966	1	ENSMGAG00000004905
KCNA1	1	75665633..75669355	0.0551062	-5.21744	-37.2055	0.0707162	0.999966	1	ENSMGAG00000013892
AHCTF1	2	34371539..34417439	3.88552	-0.638493	-1.5567	0.0707708	0.999966	1	ENSMGAG00000011377
COL1A2	6	23794478..23846500	880.582	0.555038	1.46921	0.0709074	0.999966	1	ENSMGAG00000008980
SF3B4	27	complement(166599..174416)	11.7501	0.671931	1.5932	0.0709936	0.999966	1	ENSMGAG00000000653
HTRA1	8	34190046..34217119	643.65	0.522949	1.43689	0.0710014	0.999966	1	ENSMGAG00000011551
KLHL20	10	complement(5300904..5321117)	15.5865	-0.508827	-1.42289	0.0710066	0.999966	1	ENSMGAG00000003427
gene:ENSMGAG00000010811	3	57899794..57923239	0.0591832	2.39156	5.24725	0.0710898	0.999966	1	ENSMGAG00000010811
COL8A1	1	complement(88260529..88263875)	12.6722	0.622694	1.53975	0.0711812	0.999966	1	ENSMGAG00000013275
LZTS1	24	1629920..1632145	9.16081	0.546043	1.46008	0.0712922	0.999966	1	ENSMGAG00000001734
MYO3A	6	complement(16469501..16568061)	0.846345	-0.877768	-1.83753	0.0713305	0.999966	1	ENSMGAG00000006952
UBA7	14	2463861..2468033	14.9708	0.481062	1.39577	0.0713889	0.999966	1	ENSMGAG00000003255
FUT4	1	complement(193667442..193668113)	1.12962	1.08248	2.11767	0.0714169	0.999966	1	ENSMGAG00000015195
FAM241A	4	complement(39340230..39341898)	8.05161	0.739542	1.66965	0.0714387	0.999966	1	ENSMGAG00000010991
gene:ENSMGAG00000014750	1	complement(137626490..137654932)	5.93756	-0.614054	-1.53055	0.071481	0.999966	1	ENSMGAG00000014750
AURKA	22	12999327..13004967	72.9766	-0.541489	-1.45547	0.071582	0.999966	1	ENSMGAG00000009205
gene:ENSMGAG00000017370	GL424233.1	complement(193..6640)	0.920746	1.01386	2.0193	0.0716206	0.999966	1	ENSMGAG00000017370
MYOM3	25	complement(5432803..5458808)	0.022181	2.50997	5.6961	0.0716687	0.999966	1	ENSMGAG00000005790
gene:ENSMGAG00000008229	GL427461.1	complement(119..1708)	1.27821	1.01005	2.01399	0.0717651	0.999966	1	ENSMGAG00000008229
NHSL1	2	56065949..56114366	0.456606	-0.831935	-1.78007	0.0718475	0.999966	1	ENSMGAG00000012975
gene:ENSMGAG00000002789	14	2712644..2715649	4.26487	0.625432	1.54267	0.0719585	0.999966	1	ENSMGAG00000002789
GCM1	2	92675891..92684210	0.0379751	-5.12706	-34.9461	0.072028	0.999966	1	ENSMGAG00000013927
gene:ENSMGAG00000003632	1	complement(1344667..1444306)	0.0161407	-3.08524	-8.48693	0.0720977	0.999966	1	ENSMGAG00000003632
SULF1	3	66526631..66593372	1.99405	-0.631531	-1.54921	0.0721401	0.999966	1	ENSMGAG00000011387
gene:ENSMGAG00000006183	23	5757073..5761491	0.0707651	-4.95492	-31.0155	0.0723096	0.999966	1	ENSMGAG00000006183
AQP9	12	complement(6747919..6771777)	0.587102	1.10033	2.14404	0.0723134	0.999966	1	ENSMGAG00000005501
CCDC102B	3	complement(20241880..20247406)	1.33205	0.918039	1.88954	0.0723961	0.999966	1	ENSMGAG00000008420
ZBTB7C	Z	1459782..1460960	19.6587	-0.574349	-1.48901	0.072473	0.999966	1	ENSMGAG00000001366
SUPT5H	GL424139.1	complement(300..7770)	7.42849	0.851311	1.80414	0.0725542	0.999966	1	ENSMGAG00000012449
CALCRL	7	complement(6645133..6670266)	1.88259	0.804064	1.74601	0.0726292	0.999966	1	ENSMGAG00000004601
ASPHD2	GL425356.1	complement(3..1794)	1.57372	0.979352	1.97158	0.0726798	0.999966	1	ENSMGAG00000006953
gene:ENSMGAG00000006776	5	10421720..10473000	0.0465408	-5.00006	-32.0014	0.0729157	0.999966	1	ENSMGAG00000006776
NID1	2	38590454..38621144	56.1603	-0.498933	-1.41317	0.0736091	0.999966	1	ENSMGAG00000011823
SRGAP1	1	35212711..35284283	5.56698	-0.49782	-1.41208	0.0736475	0.999966	1	ENSMGAG00000010168
FHL3	25	3301364..3325509	72.0264	0.516689	1.43067	0.0737518	0.999966	1	ENSMGAG00000002858
BMT2	1	27551127..27573331	1.55158	0.675568	1.59723	0.0737681	0.999966	1	ENSMGAG00000009071
KIF23	12	19492158..19508660	22.658	-0.484556	-1.39916	0.0738108	0.999966	1	ENSMGAG00000010217
ARHGAP28	3	complement(49025068..49095153)	12.1322	0.68432	1.60694	0.0739031	0.999966	1	ENSMGAG00000009369
gene:ENSMGAG00000004321	25	4681067..4707063	0.0892413	-1.4711	-2.77232	0.0739494	0.999966	1	ENSMGAG00000004321
gene:ENSMGAG00000016768	3	10596422..10609573	0.0993053	-2.90448	-7.48745	0.0740295	0.999966	1	ENSMGAG00000016768
gene:ENSMGAG00000016610	29	complement(4114216..4118038)	0.0950294	1.72207	3.29908	0.0740692	0.999966	1	ENSMGAG00000016610
PLD4	5	53961948..53977208	1.383	0.966714	1.95438	0.0741139	0.999966	1	ENSMGAG00000013458
ATP6V1A	1	complement(82858027..82875364)	38.9033	-0.412381	-1.33088	0.0741997	0.999966	1	ENSMGAG00000014243
GPR26	8	34764260..34777341	0.0426698	4.50328	22.6789	0.0743019	0.999966	1	ENSMGAG00000011624
CSRNP1	6	4782924..4788572	16.1547	0.69596	1.61996	0.0743033	0.999966	1	ENSMGAG00000003865
gene:ENSMGAG00000006015	28	complement(4391961..4404370)	1.14938	-0.751097	-1.68307	0.0749209	0.999966	1	ENSMGAG00000006015
IQSEC1	14	complement(5370991..5413712)	4.1923	-0.568564	-1.48305	0.0749371	0.999966	1	ENSMGAG00000005294
THY1	26	4411653..4413700	8.71231	0.701171	1.62582	0.0749523	0.999966	1	ENSMGAG00000002600
TECTB	8	29147178..29155557	0.0631019	-5.22562	-37.4171	0.0749653	0.999966	1	ENSMGAG00000010887
WNT7B	1	complement(70469221..70568687)	0.0409844	4.67633	25.5691	0.0749886	0.999966	1	ENSMGAG00000013837
gene:ENSMGAG00000016797	19	complement(2668825..2673968)	0.158523	2.24881	4.75292	0.0750322	0.999966	1	ENSMGAG00000016797
MEGF6	23	986371..1018518	0.389913	1.12967	2.18808	0.075085	0.999966	1	ENSMGAG00000001770
gene:ENSMGAG00000006602	GL425866.1	complement(737..2044)	0.334529	1.83455	3.5666	0.0751423	0.999966	1	ENSMGAG00000006602
RPTOR	20	5570605..5687217	6.74925	-0.633654	-1.55149	0.0751512	0.999966	1	ENSMGAG00000006122
FAM198A	6	complement(42006532..42011997)	0.639156	1.16073	2.23571	0.0751819	0.999966	1	ENSMGAG00000011283
B3GNT10	8	8681460..8683047	0.351056	1.36102	2.56866	0.0751981	0.999966	1	ENSMGAG00000003352
MNS1	12	7359708..7364894	1.04627	0.929468	1.90457	0.0752483	0.999966	1	ENSMGAG00000005754
IARS	14	3498414..3589821	20.6102	-0.510048	-1.4241	0.0752499	0.999966	1	ENSMGAG00000004555
gene:ENSMGAG00000009527	17	complement(10684956..10689276)	10.5361	0.588005	1.50317	0.0752893	0.999966	1	ENSMGAG00000009527
CPAMD8	30	3558953..3593623	4.07857	-0.656861	-1.57665	0.0752988	0.999966	1	ENSMGAG00000005382
FZD6	3	80155591..80185355	16.373	-0.488232	-1.40273	0.0755605	0.999966	1	ENSMGAG00000012347
B3GNT4	17	6005005..6006093	2.48874	1.17767	2.2621	0.0755648	0.999966	1	ENSMGAG00000015463
EGR4	4	73792611..73794301	9.30152	0.649358	1.56847	0.0755742	0.999966	1	ENSMGAG00000013308
MFSD4B	2	complement(68579341..68582728)	5.90981	-0.692445	-1.61602	0.0755782	0.999966	1	ENSMGAG00000013426
gene:ENSMGAG00000001663	29	2021020..2031629	0.0235637	2.74403	6.69941	0.0757477	0.999966	1	ENSMGAG00000001663
GRIA2	4	2028746..2072634	0.0379314	2.58022	5.98033	0.0761809	0.999966	1	ENSMGAG00000001712
DCBLD1	2	complement(65506219..65535705)	10.9626	-0.557147	-1.47136	0.0762538	0.999966	1	ENSMGAG00000013352
gene:ENSMGAG00000012962	5	complement(42680825..42681674)	13.0518	-0.677176	-1.59901	0.0762689	0.999966	1	ENSMGAG00000012962
HSPA13	1	complement(103157056..103161956)	4.50612	0.661376	1.58159	0.0764713	0.999966	1	ENSMGAG00000014475
CLSTN1	23	complement(3639336..3663812)	8.76886	-0.632125	-1.54985	0.0768259	0.999966	1	ENSMGAG00000003902
PRSS12	4	37087539..37126511	1.35142	-0.720919	-1.64823	0.0768419	0.999966	1	ENSMGAG00000010824
DES	7	complement(23543313..23547976)	248.8	0.460209	1.37574	0.0769481	0.999966	1	ENSMGAG00000011289
gene:ENSMGAG00000005424	GL425370.1	complement(353..1614)	29.051	0.601656	1.51746	0.0769706	0.999966	1	ENSMGAG00000005424
RB1	1	177355257..177448840	27.8731	-0.520406	-1.43436	0.076975	0.999966	1	ENSMGAG00000015008
ADAMTS20	1	complement(31128568..31218021)	0.191764	-0.908999	-1.87774	0.0769881	0.999966	1	ENSMGAG00000009481
ALS2	7	complement(11707545..11738611)	8.03721	-0.499549	-1.41377	0.0769926	0.999966	1	ENSMGAG00000008034
ERG	1	complement(113288780..113350146)	1.89326	0.828897	1.77633	0.076997	0.999966	1	ENSMGAG00000014553
gene:ENSMGAG00000012066	2	complement(40980086..40983702)	15.8027	0.585149	1.50019	0.0770913	0.999966	1	ENSMGAG00000012066
gene:ENSMGAG00000003000	GL424570.1	319..3170	33.0442	0.509719	1.42377	0.0772836	0.999966	1	ENSMGAG00000003000
CCDC73	5	821808..864650	0.147562	-1.28085	-2.42981	0.0774663	0.999966	1	ENSMGAG00000001437
gene:ENSMGAG00000009703	GL429084.1	complement(5196..7051)	5.00535	0.707322	1.63277	0.0775392	0.999966	1	ENSMGAG00000009703
gene:ENSMGAG00000002741	13	complement(2228738..2232482)	8.90821	0.795166	1.73528	0.0777638	0.999966	1	ENSMGAG00000002741
ATP10B	15	7301117..7351650	0.0251651	2.27303	4.83336	0.0778116	0.999966	1	ENSMGAG00000002806
gene:ENSMGAG00000005659	2	complement(9903089..9917573)	41.8448	0.472509	1.38752	0.0778719	0.999966	1	ENSMGAG00000005659
ABCC1	16	7950497..7988694	8.28509	-0.509644	-1.4237	0.0779043	0.999966	1	ENSMGAG00000007175
SFI1	17	complement(9353818..9378282)	7.42909	-0.584808	-1.49984	0.0779177	0.999966	1	ENSMGAG00000008328
SNX8	16	complement(3221532..3236993)	10.3936	-0.546882	-1.46093	0.0779725	0.999966	1	ENSMGAG00000002706
gene:ENSMGAG00000007471	GL426381.1	complement(4765..6157)	2.57668	0.836148	1.78528	0.0780575	0.999966	1	ENSMGAG00000007471
C15orf48	12	10546251..10548366	33.7184	0.566805	1.48124	0.0782103	0.999966	1	ENSMGAG00000007267
RBM38	22	complement(12536447..12547481)	6.75133	0.73386	1.66308	0.0782198	0.999966	1	ENSMGAG00000009072
gene:ENSMGAG00000009396	GL428696.1	complement(2..2964)	14.2983	0.554287	1.46844	0.0785939	0.999966	1	ENSMGAG00000009396
IFT172	2	109845718..109878388	3.38625	-0.606833	-1.52291	0.0787264	0.999966	1	ENSMGAG00000014068
gene:ENSMGAG00000016843	1	150029436..150030482	0.79512	1.30832	2.47653	0.0787946	0.999966	1	ENSMGAG00000016843
gene:ENSMGAG00000016427	Z	48992132..48992257	17.6468	0.742313	1.67286	0.0788438	0.999966	1	ENSMGAG00000016427
TPCN2	5	17219780..17241984	12.376	-0.659935	-1.58001	0.0789853	0.999966	1	ENSMGAG00000009876
ZDHHC7	13	complement(17063001..17071806)	15.5161	-0.583984	-1.49898	0.0791311	0.999966	1	ENSMGAG00000007256
gene:ENSMGAG00000011561	8	34232733..34238498	0.210357	-1.62557	-3.08564	0.0792613	0.999966	1	ENSMGAG00000011561
DNM1	19	complement(5181715..5221176)	63.3286	-0.55138	-1.46549	0.0795949	0.999966	1	ENSMGAG00000003998
HSPB1	21	complement(4620805..4622737)	243.794	0.56545	1.47985	0.0796318	0.999966	1	ENSMGAG00000003680
GADD45A	10	29868165..29869450	68.4205	0.438333	1.35504	0.0796872	0.999966	1	ENSMGAG00000011990
AGTR2	9	2477707..2478795	1.53182	0.928653	1.9035	0.079694	0.999966	1	ENSMGAG00000015805
P2RY8	1	136652999..136679473	4.2065	0.593122	1.50851	0.0800295	0.999966	1	ENSMGAG00000014741
gene:ENSMGAG00000004784	GL425127.1	393..689	1.34885	-1.41131	-2.65978	0.0800793	0.999966	1	ENSMGAG00000004784
UBL3	1	182875623..182887502	25.1153	0.528911	1.44284	0.0800835	0.999966	1	ENSMGAG00000015089
MBTPS1	13	complement(216378..239875)	10.6525	-0.518226	-1.43219	0.0801837	0.999966	1	ENSMGAG00000000805
PRNP	24	complement(406619..411013)	19.4298	0.56223	1.47655	0.0802348	0.999966	1	ENSMGAG00000000725
gene:ENSMGAG00000010028	2	23945359..23952373	7.8111	-0.676696	-1.59848	0.0802595	0.999966	1	ENSMGAG00000010028
CAPN2	2	complement(17549784..17569887)	8.1205	0.595098	1.51058	0.0803024	0.999966	1	ENSMGAG00000008632
gene:ENSMGAG00000016478	Z	8973837..9088771	0.177178	-1.02987	-2.04184	0.0805313	0.999966	1	ENSMGAG00000016478
TBC1D2B	12	3200176..3220262	7.24829	-0.503655	-1.4178	0.0806074	0.999966	1	ENSMGAG00000003929
FAT2	15	12535340..12572823	0.195662	-0.852505	-1.80563	0.0809527	0.999966	1	ENSMGAG00000006079
gene:ENSMGAG00000017173	29	complement(4409197..4410095)	0.112887	4.31542	19.91	0.081056	0.999966	1	ENSMGAG00000017173
gene:ENSMGAG00000002323	GL424445.1	complement(3..1771)	12.234	-0.623044	-1.54012	0.0810711	0.999966	1	ENSMGAG00000002323
C15orf62	5	complement(5510120..5510662)	0.742252	1.19606	2.29113	0.0810788	0.999966	1	ENSMGAG00000002941
RASGRF1	12	complement(20510190..20535149)	0.102795	1.22578	2.33881	0.0810818	0.999966	1	ENSMGAG00000012254
RFX4	1	complement(54720454..54800193)	0.211563	1.14361	2.20933	0.0811611	0.999966	1	ENSMGAG00000012867
SERPINF2	21	5794978..5800668	286.205	0.720393	1.64763	0.0813791	0.999966	1	ENSMGAG00000005251
GPR141	6	complement(47229082..47229930)	0.0995116	2.13547	4.39379	0.0813937	0.999966	1	ENSMGAG00000015889
SLC44A5	10	complement(31012017..31049023)	13.6863	-0.662209	-1.5825	0.0816464	0.999966	1	ENSMGAG00000012156
DNAJC6	10	29484397..29504881	14.5443	-0.607103	-1.5232	0.0816951	0.999966	1	ENSMGAG00000011841
TOX	3	complement(62131380..62234711)	0.303518	1.36729	2.57986	0.0817939	0.999966	1	ENSMGAG00000011079
SLA	3	complement(92848113..92861474)	5.74498	0.797253	1.73779	0.0818271	0.999966	1	ENSMGAG00000012853
MTTP	4	42281416..42308865	0.057234	-1.82325	-3.53877	0.0819157	0.999966	1	ENSMGAG00000011219
MVP	28	2131653..2140281	26.7624	0.453624	1.36948	0.0819836	0.999966	1	ENSMGAG00000003200
gene:ENSMGAG00000015711	1	48972589..48973311	23.3004	0.580276	1.49514	0.0821205	0.999966	1	ENSMGAG00000015711
STMN2	3	71074124..71106947	0.774241	1.13385	2.19444	0.0821306	0.999966	1	ENSMGAG00000011611
DOCK7	10	complement(28580120..28669366)	6.53148	-0.552893	-1.46702	0.0821613	0.999966	1	ENSMGAG00000011689
TDRD9	5	52687604..52727016	0.0707666	1.45247	2.73676	0.0822399	0.999966	1	ENSMGAG00000013431
gene:ENSMGAG00000017183	1	complement(25772673..25772855)	17.7568	0.670045	1.59112	0.0823063	0.999966	1	ENSMGAG00000017183
WNK2	14	complement(6658828..6754106)	0.0397452	-1.42686	-2.6886	0.0824245	0.999966	1	ENSMGAG00000005548
PTPRB	1	complement(37594328..37632759)	1.8131	-0.589679	-1.50491	0.0824916	0.999966	1	ENSMGAG00000010645
RAB3B	10	complement(24954169..24993408)	34.8576	-0.553256	-1.46739	0.0826395	0.999966	1	ENSMGAG00000011090
PRAG1	4	30836554..30853673	12.9567	-0.601585	-1.51738	0.0826681	0.999966	1	ENSMGAG00000009325
IL17C	13	complement(18634827..18636023)	2.58984	1.05408	2.0764	0.0826752	0.999966	1	ENSMGAG00000007878
HTR1E	2	complement(80015792..80016886)	0.49075	1.1555	2.22761	0.0828756	0.999966	1	ENSMGAG00000015928
gene:ENSMGAG00000016508	GL424516.1	25033..25299	725.98	0.507561	1.42165	0.0828994	0.999966	1	ENSMGAG00000016508
FLNB	14	9254080..9323528	13.2531	-0.552064	-1.46618	0.0829503	0.999966	1	ENSMGAG00000006582
gene:ENSMGAG00000017358	1	complement(48707997..48708281)	21.058	0.593278	1.50867	0.0830258	0.999966	1	ENSMGAG00000017358
gene:ENSMGAG00000007601	8	complement(19715016..19724587)	0.052577	-5.10068	-34.3129	0.0831232	0.999966	1	ENSMGAG00000007601
gene:ENSMGAG00000000641	18	complement(108201..108949)	22.3057	0.985752	1.98035	0.0831258	0.999966	1	ENSMGAG00000000641
PADI2	23	167814..176907	0.0233347	4.56459	23.6634	0.0832469	0.999966	1	ENSMGAG00000000772
PPIP5K1	12	20342761..20380815	2.18822	-0.581967	-1.49689	0.0832697	0.999966	1	ENSMGAG00000010658
gene:ENSMGAG00000002593	16	complement(2656642..2665170)	10.3093	0.525173	1.43911	0.0832907	0.999966	1	ENSMGAG00000002593
IQCG	11	complement(15070600..15086519)	0.761861	1.01815	2.02533	0.0833731	0.999966	1	ENSMGAG00000008073
NGEF	11	2411195..2435330	0.541279	-0.864706	-1.82097	0.0834536	0.999966	1	ENSMGAG00000001652
RHO	14	20409405..20412012	0.349174	-1.22415	-2.33618	0.0836943	0.999966	1	ENSMGAG00000010301
PRSS57	30	complement(2321835..2323450)	0.0378184	4.31504	19.9048	0.08372	0.999966	1	ENSMGAG00000003385
BRINP1	19	complement(4041954..4121483)	0.488705	0.993474	1.99097	0.0837258	0.999966	1	ENSMGAG00000003244
TYMS	3	complement(51418687..51426524)	148.062	-0.459768	-1.37532	0.0839042	0.999966	1	ENSMGAG00000009784
IKZF1	3	29705466..29782934	1.55833	0.755572	1.6883	0.0839431	0.999966	1	ENSMGAG00000006477
SLC4A3	7	complement(23132104..23156656)	2.56958	0.583768	1.49876	0.0841235	0.999966	1	ENSMGAG00000011177
GDPD5	1	complement(202800930..202912158)	37.2434	-0.396089	-1.31594	0.0844079	0.999966	1	ENSMGAG00000015290
TMEM173	15	complement(315450..317387)	10.5535	0.56853	1.48301	0.0845359	0.999966	1	ENSMGAG00000000985
CAPN6	9	13217454..13261305	6.61889	-0.581818	-1.49673	0.0845432	0.999966	1	ENSMGAG00000006471
TMC2	6	45216972..45244621	0.0118249	4.31484	19.902	0.0847322	0.999966	1	ENSMGAG00000011747
HES5	23	1460398..1462005	0.0274065	4.31523	19.9074	0.0847817	0.999966	1	ENSMGAG00000002009
AMER1	9	11509927..11513326	0.227953	-1.01771	-2.0247	0.0848366	0.999966	1	ENSMGAG00000005670
COP1	10	complement(3729550..3820276)	44.7682	-0.452926	-1.36881	0.0848895	0.999966	1	ENSMGAG00000002304
gene:ENSMGAG00000008125	17	complement(9250028..9291399)	5.20469	-0.598629	-1.51428	0.084992	0.999966	1	ENSMGAG00000008125
SEC16B	10	complement(4130400..4141442)	0.13296	-1.22745	-2.34153	0.0850185	0.999966	1	ENSMGAG00000002443
gene:ENSMGAG00000015341	8	complement(38562655..38562891)	0.306841	-2.4771	-5.56779	0.0850297	0.999966	1	ENSMGAG00000015341
TNFAIP2	5	52226539..52232999	9.13287	0.579675	1.49451	0.085058	0.999966	1	ENSMGAG00000013394
gene:ENSMGAG00000003453	28	complement(2352524..2355790)	14.8201	-0.641495	-1.55995	0.0854191	0.999966	1	ENSMGAG00000003453
KCNK5	2	29604040..29608274	28.2938	-0.506276	-1.42038	0.0857021	0.999966	1	ENSMGAG00000010592
gene:ENSMGAG00000001645	8	complement(34665..45487)	0.119731	2.19093	4.56599	0.0857288	0.999966	1	ENSMGAG00000001645
gene:ENSMGAG00000002607	Z	8744459..8746454	5.5259	-0.81015	-1.75339	0.085744	0.999966	1	ENSMGAG00000002607
SMG7	10	complement(2896898..2924170)	5.89891	-0.56192	-1.47623	0.0857499	0.999966	1	ENSMGAG00000001561
B4GALT2	10	21204954..21207801	118.711	0.454211	1.37003	0.0858633	0.999966	1	ENSMGAG00000009980
CDKN3	5	complement(59039864..59044736)	66.8422	-0.566868	-1.4813	0.0858757	0.999966	1	ENSMGAG00000013696
TMEM184A	16	complement(2710825..2714623)	24.9881	-0.713784	-1.6401	0.0860892	0.999966	1	ENSMGAG00000002656
CDC42EP1	1	50160080..50162599	12.8619	0.519304	1.43326	0.0861348	0.999966	1	ENSMGAG00000012576
YTHDC2	Z	complement(48216959..48254220)	14.0269	-0.457583	-1.37324	0.0862356	0.999966	1	ENSMGAG00000006674
GPT2	13	complement(7571142..7583198)	5.07257	-0.637264	-1.55538	0.0862879	0.999966	1	ENSMGAG00000005229
gene:ENSMGAG00000013145	1	57313073..57365046	2.26116	0.617971	1.53472	0.0863961	0.999966	1	ENSMGAG00000013145
gene:ENSMGAG00000008378	19	complement(1792884..1794008)	54.809	-0.685047	-1.60775	0.0865604	0.999966	1	ENSMGAG00000008378
gene:ENSMGAG00000014159	2	111228238..111231699	15.878	-0.655929	-1.57563	0.086596	0.999966	1	ENSMGAG00000014159
ABCB6	7	23364295..23368713	24.802	0.488233	1.40273	0.0866308	0.999966	1	ENSMGAG00000012199
SCUBE1	1	complement(119086730..119174281)	6.46225	-0.593535	-1.50894	0.0866361	0.999966	1	ENSMGAG00000013781
AMPD2	GL425467.1	86..3922	2.14105	-0.700528	-1.6251	0.0866544	0.999966	1	ENSMGAG00000005835
gene:ENSMGAG00000016965	GL424516.1	24657..24833	676.19	0.605602	1.52161	0.086966	0.999966	1	ENSMGAG00000016965
FNBP4	5	complement(6216514..6225009)	1.71251	0.701154	1.62581	0.086993	0.999966	1	ENSMGAG00000004226
gene:ENSMGAG00000006827	Z	49998840..50000412	10.1954	-0.701374	-1.62605	0.0872687	0.999966	1	ENSMGAG00000006827
COLQ	6	complement(34443317..34470817)	0.090001	2.52944	5.77349	0.0872846	0.999966	1	ENSMGAG00000010801
UNC93A	2	43423242..43439865	1.20756	-0.932282	-1.90829	0.0873081	0.999966	1	ENSMGAG00000012812
GRHL1	2	101311279..101344849	1.97693	-0.692534	-1.61612	0.0873443	0.999966	1	ENSMGAG00000014007
gene:ENSMGAG00000017076	GL427583.1	6910..8163	0.871942	1.1856	2.27458	0.0876517	0.999966	1	ENSMGAG00000017076
gene:ENSMGAG00000011853	1	48927351..48944570	46.2899	0.519956	1.43391	0.0877168	0.999966	1	ENSMGAG00000011853
gene:ENSMGAG00000004170	15	complement(9709029..9710752)	0.0648127	-4.87843	-29.4141	0.0877446	0.999966	1	ENSMGAG00000004170
SLCO2A1	11	4109590..4124795	3.53218	0.840926	1.7912	0.0878039	0.999966	1	ENSMGAG00000003010
gene:ENSMGAG00000002342	23	1931717..1938400	0.274181	-1.1335	-2.19391	0.0878275	0.999966	1	ENSMGAG00000002342
DOCK11	9	2811976..2878747	3.69235	-0.506426	-1.42053	0.0879153	0.999966	1	ENSMGAG00000002797
gene:ENSMGAG00000011883	5	29265038..29292919	59.6687	0.512742	1.42676	0.0880028	0.999966	1	ENSMGAG00000011883
SLC35F6	2	complement(110669487..110682505)	60.3554	0.489702	1.40415	0.0881148	0.999966	1	ENSMGAG00000014128
gene:ENSMGAG00000009759	GL429179.1	complement(1066..2796)	24.0397	0.561437	1.47574	0.0881451	0.999966	1	ENSMGAG00000009759
YPEL4	5	complement(17013842..17015677)	1.0072	1.13566	2.19719	0.0882469	0.999966	1	ENSMGAG00000009641
FBXO47	29	complement(3758588..3765132)	0.0357076	2.98158	7.89849	0.0883103	0.999966	1	ENSMGAG00000005219
ABCC4	1	151955406..152098221	10.8866	-0.489406	-1.40387	0.0884766	0.999966	1	ENSMGAG00000014910
RASD1	16	complement(5088104..5089243)	72.364	0.457412	1.37308	0.0885545	0.999966	1	ENSMGAG00000004443
gene:ENSMGAG00000015964	11	4734975..4735151	0.235926	2.79749	6.9523	0.0885894	0.999966	1	ENSMGAG00000015964
CRYGS	11	complement(3873570..3877365)	0.187565	2.29957	4.92311	0.0887399	0.999966	1	ENSMGAG00000002636
SEC31B	8	19549646..19576650	6.94977	-0.635615	-1.5536	0.0887908	0.999966	1	ENSMGAG00000007326
SLC7A3	9	1841614..1846258	17.1814	0.507951	1.42203	0.0891977	0.999966	1	ENSMGAG00000002203
AGR2	6	complement(29351173..29353996)	0.175725	-2.17845	-4.52666	0.0894055	0.999966	1	ENSMGAG00000010157
STOX1	8	12159019..12162757	0.0714196	-1.68749	-3.22096	0.0895144	0.999966	1	ENSMGAG00000004248
SMYD5	4	complement(73804470..73838128)	9.76134	-0.641239	-1.55967	0.0897001	0.999966	1	ENSMGAG00000013285
gene:ENSMGAG00000017035	1	190929205..190930622	46.735	0.57791	1.49269	0.0897242	0.999966	1	ENSMGAG00000017035
gene:ENSMGAG00000007461	19	8118577..8124862	1.26391	-0.867567	-1.82458	0.0897828	0.999966	1	ENSMGAG00000007461
FGD4	1	complement(60258138..60296476)	3.3401	-0.614631	-1.53117	0.0898729	0.999966	1	ENSMGAG00000013316
gene:ENSMGAG00000009567	8	24465749..24481107	2.66499	0.877401	1.83706	0.0899184	0.999966	1	ENSMGAG00000009567
PRTG	12	7556562..7640505	0.140315	-1.16371	-2.24033	0.0899353	0.999966	1	ENSMGAG00000005912
METTL24	2	68981422..69008745	3.7309	0.69865	1.62298	0.0899368	0.999966	1	ENSMGAG00000013447
gene:ENSMGAG00000016458	6	complement(50372477..50399353)	0.127703	2.79716	6.95069	0.089959	0.999966	1	ENSMGAG00000016458
RS1	1	127805290..127816975	0.0579853	-4.78561	-27.5811	0.0899802	0.999966	1	ENSMGAG00000014673
SLC26A9	28	complement(2289677..2301028)	0.072603	-1.77413	-3.42032	0.0900253	0.999966	1	ENSMGAG00000003329
gene:ENSMGAG00000010878	6	complement(34921123..34929881)	0.154499	-1.85338	-3.61345	0.0900634	0.999966	1	ENSMGAG00000010878
gene:ENSMGAG00000016621	12	20401383..20507095	41.6851	-0.620379	-1.53728	0.0903038	0.999966	1	ENSMGAG00000016621
TSTD3	2	complement(75015589..75018217)	18.8377	0.583468	1.49845	0.090309	0.999966	1	ENSMGAG00000013555
SPART	1	180080565..180090257	16.361	-0.47185	-1.38689	0.0904168	0.999966	1	ENSMGAG00000015063
ELOVL4	2	82887429..82902513	11.252	-0.648249	-1.56727	0.0904227	0.999966	1	ENSMGAG00000013759
E2F8	5	4756852..4766182	6.80756	-0.575214	-1.4899	0.0904897	0.999966	1	ENSMGAG00000002303
LAMC1	10	complement(3097293..3130070)	22.6932	-0.489518	-1.40398	0.0905858	0.999966	1	ENSMGAG00000001723
gene:ENSMGAG00000002666	9	complement(2693652..2753537)	32.6698	-0.45731	-1.37298	0.0908078	0.999966	1	ENSMGAG00000002666
gene:ENSMGAG00000016913	5	complement(4407345..4455361)	3.59996	-0.547091	-1.46114	0.0908637	0.999966	1	ENSMGAG00000016913
HSF5	21	complement(586474..607099)	0.689465	0.922793	1.89578	0.0908722	0.999966	1	ENSMGAG00000001986
gene:ENSMGAG00000007324	22	complement(10976993..10979297)	0.519084	1.46336	2.75749	0.0911497	0.999966	1	ENSMGAG00000007324
gene:ENSMGAG00000001630	9	complement(1244524..1266878)	20.6645	-0.433861	-1.35084	0.0911735	0.999966	1	ENSMGAG00000001630
CYBA	13	18631168..18632714	52.2997	0.536021	1.44997	0.0912603	0.999966	1	ENSMGAG00000007845
gene:ENSMGAG00000013530	1	complement(63996143..64004192)	5.50169	0.69614	1.62016	0.0913279	0.999966	1	ENSMGAG00000013530
GLRB	4	1925274..1968441	1.0067	-0.909523	-1.87842	0.0913431	0.999966	1	ENSMGAG00000001659
WISP3	2	complement(68160352..68164826)	0.196422	-1.55607	-2.94053	0.0913729	0.999966	1	ENSMGAG00000013414
gene:ENSMGAG00000014195	2	complement(112633058..112636249)	3.59823	0.659512	1.57955	0.09147	0.999966	1	ENSMGAG00000014195
gene:ENSMGAG00000007514	1	complement(15679915..15686192)	43.0215	-0.479557	-1.39432	0.0916554	0.999966	1	ENSMGAG00000007514
C1QTNF12	23	2543755..2557878	14.1195	-0.564374	-1.47875	0.0917861	0.999966	1	ENSMGAG00000003189
gene:ENSMGAG00000016778	Z	360060..361386	1.83699	1.20675	2.30818	0.0918967	0.999966	1	ENSMGAG00000016778
SPATA5L1	12	10537071..10542664	17.0939	0.50591	1.42002	0.0919518	0.999966	1	ENSMGAG00000007254
CA12	12	3515523..3533261	0.353324	-1.2864	-2.43918	0.0920097	0.999966	1	ENSMGAG00000004066
gene:ENSMGAG00000011019	GL425694.1	complement(337..3433)	1.14838	-1.26738	-2.40724	0.0920367	0.999966	1	ENSMGAG00000011019
gene:ENSMGAG00000009766	GL424372.1	74..1058	775.651	0.520167	1.43412	0.09214	0.999966	1	ENSMGAG00000009766
gene:ENSMGAG00000007579	Z	56976055..56978650	0.0676587	4.25678	19.117	0.0922373	0.999966	1	ENSMGAG00000007579
PKP3	5	4947230..4952162	0.0232972	-4.79962	-27.8503	0.0922755	0.999966	1	ENSMGAG00000002590
EDRF1	8	35562529..35584735	8.45839	-0.47134	-1.3864	0.0922805	0.999966	1	ENSMGAG00000011712
TNFRSF4	23	2612701..2618857	1.67067	1.00652	2.00905	0.0923266	0.999966	1	ENSMGAG00000003240
RPL21	1	complement(183826957..183830456)	301.217	0.373475	1.29547	0.0926574	0.999966	1	ENSMGAG00000015105
ZC3H7B	1	51675599..51716620	3.03614	-0.639599	-1.5579	0.0928202	0.999966	1	ENSMGAG00000012234
gene:ENSMGAG00000015334	8	23644804..23645733	9.195	0.669771	1.59082	0.0929102	0.999966	1	ENSMGAG00000015334
gene:ENSMGAG00000002989	6	complement(3492879..3494004)	0.271523	1.73411	3.32675	0.0930358	0.999966	1	ENSMGAG00000002989
gene:ENSMGAG00000014279	1	complement(130890139..130895000)	0.25086	-1.96498	-3.90406	0.093272	0.999966	1	ENSMGAG00000014279
GALNT14	2	complement(9681775..9735635)	4.25613	-0.610118	-1.52638	0.0932829	0.999966	1	ENSMGAG00000005453
OTOP3	20	10699842..10704097	0.196586	1.26976	2.41121	0.0935248	0.999966	1	ENSMGAG00000009264
NDC80	3	complement(50560324..50580471)	7.56736	-0.595513	-1.51101	0.0938762	0.999966	1	ENSMGAG00000009700
LANCL1	7	4756478..4770919	125.616	-0.46838	-1.38356	0.0939343	0.999966	1	ENSMGAG00000004068
TGFBR3	10	14989409..15090947	8.9917	-0.517485	-1.43146	0.0939979	0.999966	1	ENSMGAG00000008367
FBLN1	1	70186932..70250541	72.7298	0.571564	1.48613	0.0941344	0.999966	1	ENSMGAG00000013829
gene:ENSMGAG00000017070	4	67382000..67394672	2.17231	0.593575	1.50898	0.0941414	0.999966	1	ENSMGAG00000017070
gene:ENSMGAG00000010799	7	complement(20811329..20842622)	0.0400341	-2.47052	-5.54245	0.0942183	0.999966	1	ENSMGAG00000010799
LGR4	5	2727151..2762714	5.78001	-0.533192	-1.44713	0.0947074	0.999966	1	ENSMGAG00000001702
PRPF19	5	6586093..6590056	54.691	0.458903	1.3745	0.0948152	0.999966	1	ENSMGAG00000003180
gene:ENSMGAG00000007783	GL426862.1	complement(2..2026)	0.461182	0.942023	1.92122	0.0949028	0.999966	1	ENSMGAG00000007783
NSF	29	complement(400747..444519)	34.9802	-0.444398	-1.36075	0.0949824	0.999966	1	ENSMGAG00000000747
ADRA1B	15	complement(7597942..7615226)	0.412998	1.08115	2.11572	0.0954117	0.999966	1	ENSMGAG00000002990
gene:ENSMGAG00000001102	Z	complement(497485..520586)	1.01823	-0.685172	-1.60789	0.0954307	0.999966	1	ENSMGAG00000001102
IGF1R	12	complement(16678611..16835505)	23.317	-0.421862	-1.33965	0.0957074	0.999966	1	ENSMGAG00000009164
LOXL1	12	1616422..1624932	36.0164	0.453129	1.36901	0.0957086	0.999966	1	ENSMGAG00000002181
NQO1	13	complement(19162569..19164167)	114.286	0.460834	1.37634	0.0958103	0.999966	1	ENSMGAG00000008667
LPCAT2	13	complement(3430932..3453685)	113.752	-0.435173	-1.35207	0.0958367	0.999966	1	ENSMGAG00000004311
SPP2	7	complement(1707878..1712739)	0.0665206	4.34682	20.348	0.0958387	0.999966	1	ENSMGAG00000002620
gene:ENSMGAG00000002623	8	complement(4873209..4878301)	0.0320099	4.34682	20.348	0.0958477	0.999966	1	ENSMGAG00000002623
FGB	4	715362..721628	0.0237816	2.88373	7.38055	0.0958833	0.999966	1	ENSMGAG00000001352
gene:ENSMGAG00000014586	1	complement(115515408..115532759)	3.73378	-0.612973	-1.52941	0.0959246	0.999966	1	ENSMGAG00000014586
GADL1	6	complement(40740885..40811860)	0.727882	-0.853623	-1.80703	0.0959877	0.999966	1	ENSMGAG00000011156
TOR1B	19	5825235..5828326	18.5083	-0.570042	-1.48457	0.0960633	0.999966	1	ENSMGAG00000005072
PRKAR2A	14	12339737..12357277	9.4157	-0.555768	-1.46995	0.0960677	0.999966	1	ENSMGAG00000008680
gene:ENSMGAG00000010738	12	20499628..20502750	30.083	-0.598761	-1.51442	0.0960717	0.999966	1	ENSMGAG00000010738
SH2B2	21	4424363..4432745	1.21705	-0.876924	-1.83646	0.0961275	0.999966	1	ENSMGAG00000003469
gene:ENSMGAG00000010034	6	complement(28300798..28359957)	0.387815	-1.13168	-2.19114	0.0961879	0.999966	1	ENSMGAG00000010034
HBZ	16	12622730..12624375	0.0544799	4.06694	16.7598	0.0963282	0.999966	1	ENSMGAG00000008793
TMPRSS13	26	complement(5720104..5725154)	1.08728	0.849347	1.80169	0.096331	0.999966	1	ENSMGAG00000003659
WIPI1	20	7229067..7246483	60.5664	0.446163	1.36241	0.0963619	0.999966	1	ENSMGAG00000007005
RFLNB	21	7308036..7309158	31.9723	0.557453	1.47167	0.0965471	0.999966	1	ENSMGAG00000007034
KCNU1	24	2088023..2127965	0.01906	-2.80723	-6.99938	0.0965939	0.999966	1	ENSMGAG00000001799
CCNE1	13	8295256..8306818	26.6806	-0.531266	-1.4452	0.096596	0.999966	1	ENSMGAG00000005396
LRRC1	2	complement(92395261..92448277)	10.6176	-0.558103	-1.47233	0.0966717	0.999966	1	ENSMGAG00000013917
gene:ENSMGAG00000003604	GL424661.1	1051..5380	3.56303	0.737608	1.66741	0.0966971	0.999966	1	ENSMGAG00000003604
PIGG	Z	complement(56179784..56242282)	13.9587	-0.436796	-1.35359	0.0967223	0.999966	1	ENSMGAG00000007223
NEO1	12	1038439..1283565	22.7439	-0.428765	-1.34608	0.0967606	0.999966	1	ENSMGAG00000001915
PKD2	4	complement(26738207..26748868)	12.8654	-0.54529	-1.45931	0.0968397	0.999966	1	ENSMGAG00000007470
ADGRA1	8	complement(23861280..24017118)	0.336527	0.944121	1.92402	0.0968905	0.999966	1	ENSMGAG00000009318
gene:ENSMGAG00000013713	2	complement(80445051..80459871)	0.0391978	2.79709	6.95038	0.096911	0.999966	1	ENSMGAG00000013713
MGAT5B	20	complement(4146641..4183369)	0.686466	-0.869779	-1.82738	0.0969271	0.999966	1	ENSMGAG00000004001
ATP9A	22	14086760..14127779	1.35421	-0.732998	-1.66209	0.0969696	0.999966	1	ENSMGAG00000009308
gene:ENSMGAG00000003794	1	2019894..2021754	0.0510277	-4.59038	-24.0903	0.0971088	0.999966	1	ENSMGAG00000003794
ARHGEF28	Z	complement(26980519..27016687)	1.44475	-0.625817	-1.54308	0.0971908	0.999966	1	ENSMGAG00000004935
AKAP8	8	37687342..37696031	9.15086	0.521548	1.43549	0.0972498	0.999966	1	ENSMGAG00000009065
RELL2	14	complement(1856722..1864642)	0.760104	0.903986	1.87123	0.0973633	0.999966	1	ENSMGAG00000002034
gene:ENSMGAG00000013024	3	100077997..100089906	3.87603	-0.582167	-1.4971	0.0973793	0.999966	1	ENSMGAG00000013024
ANGPTL2	19	complement(10378941..10388594)	19.1423	0.64885	1.56792	0.0974169	0.999966	1	ENSMGAG00000008700
RAB11FIP1	24	complement(2317747..2324283)	4.515	-0.554671	-1.46883	0.0977508	0.999966	1	ENSMGAG00000001841
gene:ENSMGAG00000016073	GL425052.1	complement(991..1410)	1.43345	1.06664	2.09455	0.0979239	0.999966	1	ENSMGAG00000016073
gene:ENSMGAG00000005367	Z	30171666..30173583	0.0507811	-4.79175	-27.6987	0.0982256	0.999966	1	ENSMGAG00000005367
RAPGEF4	7	complement(18075553..18209631)	1.44189	-0.693885	-1.61763	0.0982574	0.999966	1	ENSMGAG00000009870
PLEKHN1	23	complement(2957413..2966899)	0.205907	1.19816	2.29446	0.0983194	0.999966	1	ENSMGAG00000003465
gene:ENSMGAG00000008991	GL428256.1	complement(43096..44141)	10.6007	0.82351	1.76971	0.0983212	0.999966	1	ENSMGAG00000008991
SAMD3	2	59851073..59885146	0.0228692	4.32527	20.0464	0.0983699	0.999966	1	ENSMGAG00000013187
GUCY2C	1	52487195..52530464	0.0768652	-1.42778	-2.69033	0.0984737	0.999966	1	ENSMGAG00000011920
RGS4	10	complement(7311410..7315471)	9.3187	0.597863	1.51347	0.0985037	0.999966	1	ENSMGAG00000005272
TMUB1	GL424691.1	complement(4655..7114)	10.9872	0.572074	1.48666	0.0985128	0.999966	1	ENSMGAG00000001469
RIF1	7	37999673..38028139	8.55703	-0.465229	-1.38054	0.0986373	0.999966	1	ENSMGAG00000012732
PPEF2	4	complement(31851951..31866777)	0.0506007	-2.09817	-4.28166	0.0986958	0.999966	1	ENSMGAG00000009837
gene:ENSMGAG00000014030	2	complement(105342838..105354332)	0.0214946	-4.86124	-29.0656	0.0988406	0.999966	1	ENSMGAG00000014030
gene:ENSMGAG00000008788	13	19874122..19874561	0.14225	-4.59099	-24.1004	0.098851	0.999966	1	ENSMGAG00000008788
TSPO2	7	complement(18891521..18893725)	6.58232	0.785684	1.72391	0.0990154	0.999966	1	ENSMGAG00000010175
CLDN12	6	21954099..21954836	9.25093	-0.666889	-1.58765	0.0990449	0.999966	1	ENSMGAG00000016026
ASPA	21	complement(7019247..7024803)	0.364359	-1.19359	-2.28721	0.0990741	0.999966	1	ENSMGAG00000006753
VAMP7	9	11006622..11023356	52.4237	-0.434242	-1.3512	0.0991274	0.999966	1	ENSMGAG00000005326
PPP1R21	2	complement(8533051..8559600)	15.5936	-0.500679	-1.41488	0.0991297	0.999966	1	ENSMGAG00000004979
gene:ENSMGAG00000015286	1	complement(202580526..202586697)	25.1211	-0.626299	-1.5436	0.0991648	0.999966	1	ENSMGAG00000015286
gene:ENSMGAG00000015250	1	200924247..200924399	119.678	0.500078	1.41429	0.0993035	0.999966	1	ENSMGAG00000015250
SNAP47	6	complement(2669185..2687092)	3.9435	-0.831384	-1.77939	0.0993215	0.999966	1	ENSMGAG00000002667
gene:ENSMGAG00000017050	12	3938212..3970109	0.479434	-0.776613	-1.7131	0.0993704	0.999966	1	ENSMGAG00000017050
gene:ENSMGAG00000008223	Z	complement(69972033..69973863)	0.0421496	4.06703	16.7609	0.0994787	0.999966	1	ENSMGAG00000008223
CYTH4	1	49984222..50001078	1.22192	0.808216	1.75105	0.0996218	0.999966	1	ENSMGAG00000012600
SH3GL1	30	complement(2029590..2038451)	5.8946	-0.59309	-1.50847	0.0997275	0.999966	1	ENSMGAG00000002570
DDX11	1	61221010..61238330	18.4505	-0.550625	-1.46472	0.0998652	0.999966	1	ENSMGAG00000013363
RHOT1	20	complement(8403303..8425768)	21.5149	-0.451214	-1.36719	0.0998956	0.999966	1	ENSMGAG00000007956
HSPG2	23	6821806..6843303	7.445	0.423501	1.34118	0.0999311	0.999966	1	ENSMGAG00000007242
NDUFB10	16	6437910..6439441	244.978	0.392334	1.31252	0.100205	0.999966	1	ENSMGAG00000005622
ARC	3	complement(99190520..99191918)	1.20331	-0.917092	-1.8883	0.100229	0.999966	1	ENSMGAG00000012984
HGD	1	83491784..83510420	0.0192369	4.06656	16.7554	0.100234	0.999966	1	ENSMGAG00000014280
LVRN	Z	complement(77195780..77224631)	0.849697	0.906695	1.87475	0.100297	0.999966	1	ENSMGAG00000008909
CCDC183	21	complement(863170..868488)	0.0177543	4.06656	16.7554	0.100482	0.999966	1	ENSMGAG00000002095
FAM171A1	6	20726362..20761045	9.262	-0.528735	-1.44266	0.1005	0.999966	1	ENSMGAG00000007910
IFITM5	5	complement(4908602..4909376)	23.2094	0.569378	1.48388	0.101071	0.999966	1	ENSMGAG00000002529
TLX1	8	complement(25281501..25288190)	0.0476057	2.93061	7.62432	0.10111	0.999966	1	ENSMGAG00000010200
gene:ENSMGAG00000009564	6	complement(24126620..24138355)	24.8766	0.478151	1.39296	0.101202	0.999966	1	ENSMGAG00000009564
DUSP1	15	complement(8658441..8661642)	615.73	0.575774	1.49048	0.101289	0.999966	1	ENSMGAG00000003557
TRRAP	16	1318260..1387066	2.40296	-0.492148	-1.40654	0.101781	0.999966	1	ENSMGAG00000001667
STC2	15	complement(8835468..8841076)	2.82828	0.931827	1.90769	0.101796	0.999966	1	ENSMGAG00000003638
gene:ENSMGAG00000016950	2	complement(48142435..48159032)	0.573453	-1.04793	-2.06756	0.101935	0.999966	1	ENSMGAG00000016950
ADGRG6	2	54449208..54567988	0.372437	0.837817	1.78734	0.102052	0.999966	1	ENSMGAG00000012946
MMP9	GL428845.1	31534..35688	1050.74	0.641973	1.56046	0.10221	0.999966	1	ENSMGAG00000008489
TJP1	12	complement(5621624..5662954)	5.28252	-0.480818	-1.39554	0.102213	0.999966	1	ENSMGAG00000004922
gene:ENSMGAG00000013903	1	complement(78550582..78562602)	1.56474	-0.731887	-1.66081	0.102394	0.999966	1	ENSMGAG00000013903
CELF1	5	23503195..23519931	6.45252	-0.59858	-1.51422	0.102499	0.999966	1	ENSMGAG00000010629
KIF11	8	complement(22938463..22950540)	11.4827	-0.528043	-1.44197	0.102632	0.999966	1	ENSMGAG00000009062
GAB1	4	10935349..10978107	10.4888	-0.435596	-1.35247	0.102749	0.999966	1	ENSMGAG00000003485
KPNA6	25	complement(4873487..4883334)	65.8406	-0.426406	-1.34388	0.102864	0.999966	1	ENSMGAG00000004861
GNAI2	GL425387.1	111..1559	98.8845	0.422398	1.34015	0.103051	0.999966	1	ENSMGAG00000005486
FAR2	1	75035566..75074419	22.1832	-0.514213	-1.42822	0.103071	0.999966	1	ENSMGAG00000013873
gene:ENSMGAG00000002545	5	complement(4916129..4917421)	304.038	0.438931	1.3556	0.103127	0.999966	1	ENSMGAG00000002545
TPO	2	97477476..97511052	0.0254694	2.38174	5.21165	0.103165	0.999966	1	ENSMGAG00000013970
RRBP1	2	15315690..15333273	16.9095	0.414873	1.33318	0.103212	0.999966	1	ENSMGAG00000006816
OSTM1	2	69954414..69960010	6.83771	0.655124	1.57475	0.103265	0.999966	1	ENSMGAG00000013498
gene:ENSMGAG00000017113	26	complement(5707267..5710284)	176.449	0.449845	1.36589	0.103317	0.999966	1	ENSMGAG00000017113
P2RX1	21	3554549..3561295	0.867016	0.928014	1.90266	0.103385	0.999966	1	ENSMGAG00000002947
N4BP2L1	1	182021548..182032600	6.95269	0.762158	1.69603	0.103529	0.999966	1	ENSMGAG00000015076
SMARCD1	GL429722.1	133304..137110	13.5966	-0.528131	-1.44206	0.103572	0.999966	1	ENSMGAG00000010566
TMEM109	5	complement(6584933..6585676)	7.59458	0.630421	1.54802	0.103694	0.999966	1	ENSMGAG00000003167
NSUN7	4	complement(51701653..51713259)	0.478191	-0.954917	-1.93847	0.103706	0.999966	1	ENSMGAG00000012220
GUCY1B1	4	1242597..1264890	7.2553	-0.514929	-1.42892	0.103826	0.999966	1	ENSMGAG00000001498
gene:ENSMGAG00000015042	1	complement(171900908..171918151)	133.232	-0.536357	-1.45031	0.103982	0.999966	1	ENSMGAG00000015042
gene:ENSMGAG00000009910	14	18831840..18876369	2.17836	0.69133	1.61477	0.104085	0.999966	1	ENSMGAG00000009910
KDM1A	25	complement(1527671..1551301)	14.155	-0.525323	-1.43926	0.1041	0.999966	1	ENSMGAG00000001236
TXNRD3	14	10918177..10928192	50.0947	-0.410444	-1.3291	0.104114	0.999966	1	ENSMGAG00000007529
gene:ENSMGAG00000005512	GL425392.1	3027..5463	0.0536909	2.38183	5.21199	0.104203	0.999966	1	ENSMGAG00000005512
KPNA1	1	complement(80453142..80494087)	18.9737	-0.466764	-1.38201	0.104237	0.999966	1	ENSMGAG00000013998
ZNF536	13	8671454..8735676	0.248808	-0.909064	-1.87783	0.104396	0.999966	1	ENSMGAG00000005440
gene:ENSMGAG00000015469	17	6468651..6471074	0.0274966	2.50033	5.65817	0.104589	0.999966	1	ENSMGAG00000015469
gene:ENSMGAG00000011386	5	complement(26149500..26165407)	0.44357	0.855011	1.80877	0.10461	0.999966	1	ENSMGAG00000011386
TINAG	2	complement(92221929..92265745)	0.0299169	2.79362	6.93366	0.104638	0.999966	1	ENSMGAG00000013915
KDF1	25	249474..252119	11.4823	-0.677428	-1.59929	0.104653	0.999966	1	ENSMGAG00000000825
H2AFX	20	43918..44346	2.17688	0.846435	1.79805	0.104663	0.999966	1	ENSMGAG00000011845
MMP28	21	4744644..4750406	36.2388	0.489377	1.40384	0.104828	0.999966	1	ENSMGAG00000003978
gene:ENSMGAG00000002123	25	2345168..2351645	15.9052	0.541984	1.45597	0.105128	0.999966	1	ENSMGAG00000002123
MXI1	8	28258179..28301339	19.6523	0.411732	1.33028	0.105269	0.999966	1	ENSMGAG00000010768
UNC45B	21	complement(4843258..4851669)	0.138802	1.47304	2.77605	0.105468	0.999966	1	ENSMGAG00000004173
gene:ENSMGAG00000012246	7	complement(29682437..29699952)	4.94373	-0.645035	-1.56378	0.105549	0.999966	1	ENSMGAG00000012246
gene:ENSMGAG00000012999	2	56264036..56279672	0.408435	1.22111	2.33126	0.105623	0.999966	1	ENSMGAG00000012999
TNKS2	8	22183353..22203897	14.1209	-0.434573	-1.35151	0.105625	0.999966	1	ENSMGAG00000008555
TMC6	20	complement(5170960..5176073)	21.1612	0.447679	1.36384	0.105715	0.999966	1	ENSMGAG00000005728
KCNK10	5	complement(45022854..45059228)	0.0510875	2.19421	4.5764	0.105805	0.999966	1	ENSMGAG00000015378
RBL1	22	complement(713223..731331)	2.14953	-0.546922	-1.46097	0.105836	0.999966	1	ENSMGAG00000001062
GPX1	14	2807207..2808032	340.035	0.421223	1.33906	0.105921	0.999966	1	ENSMGAG00000002294
gene:ENSMGAG00000014338	1	87224090..87226379	0.0565885	-4.56904	-23.7365	0.106045	0.999966	1	ENSMGAG00000014338
REEP1	4	complement(69535078..69562164)	10.9383	0.610381	1.52666	0.106244	0.999966	1	ENSMGAG00000013138
SNX30	Z	complement(69962409..69994293)	19.4966	-0.517174	-1.43115	0.106286	0.999966	1	ENSMGAG00000008335
ZHX1	3	complement(88706163..88708784)	2.68208	-0.633953	-1.55181	0.10634	0.999966	1	ENSMGAG00000012584
gene:ENSMGAG00000007792	GL426839.1	28..1123	0.258016	-1.30241	-2.46641	0.106676	0.999966	1	ENSMGAG00000007792
KDM3B	15	18119614..18156222	4.66862	-0.508111	-1.42219	0.106982	0.999966	1	ENSMGAG00000009737
gene:ENSMGAG00000001786	24	complement(1423878..1424916)	3.09539	-1.14191	-2.20674	0.106999	0.999966	1	ENSMGAG00000001786
C2CD2L	20	complement(20068..31486)	5.99559	-0.603636	-1.51954	0.10707	0.999966	1	ENSMGAG00000003303
CYTIP	7	complement(38275578..38285267)	6.32128	0.637017	1.55511	0.107137	0.999966	1	ENSMGAG00000012933
gene:ENSMGAG00000002556	1	257154..320350	0.171537	1.26822	2.40863	0.107267	0.999966	1	ENSMGAG00000002556
LDB3	8	complement(5612839..5635886)	0.0452474	-2.29032	-4.89164	0.107282	0.999966	1	ENSMGAG00000002507
DBH	19	7218918..7230252	0.0160972	4.04449	16.5011	0.10738	0.999966	1	ENSMGAG00000006654
SLC7A14	11	19864262..19874213	0.0128861	4.04449	16.5011	0.107417	0.999966	1	ENSMGAG00000010187
DNTT	8	23398662..23482778	0.017628	4.04449	16.5011	0.107429	0.999966	1	ENSMGAG00000009285
TM6SF1	12	11106569..11124598	19.5485	0.520929	1.43488	0.107469	0.999966	1	ENSMGAG00000007791
ZBTB5	Z	80526397..80528415	5.88844	-0.601374	-1.51716	0.107564	0.999966	1	ENSMGAG00000016120
SUPT7L	2	28129017..28144243	2.88923	-0.655231	-1.57487	0.107633	0.999966	1	ENSMGAG00000010520
CPZ	4	complement(64090410..64124060)	5.85373	0.538165	1.45212	0.10794	0.999966	1	ENSMGAG00000012892
DKK3	5	7789656..7810446	174.873	0.45383	1.36967	0.108011	0.999966	1	ENSMGAG00000005692
CCNB2	12	complement(6415375..6421843)	261.887	-0.50021	-1.41442	0.108039	0.999966	1	ENSMGAG00000005262
YTHDF2	25	complement(1955806..1962259)	5.63977	0.533053	1.44699	0.108064	0.999966	1	ENSMGAG00000001610
gene:ENSMGAG00000001163	6	70799..73217	3.22632	0.626256	1.54355	0.10847	0.999966	1	ENSMGAG00000001163
gene:ENSMGAG00000008628	3	complement(46293478..46337767)	1.19061	-0.572425	-1.48702	0.108587	0.999966	1	ENSMGAG00000008628
LPAR5	1	complement(80677951..80703524)	3.3657	0.882339	1.84336	0.108661	0.999966	1	ENSMGAG00000014096
KIFC3	13	complement(2513659..2519040)	27.5722	0.427748	1.34513	0.10881	0.999966	1	ENSMGAG00000003302
CIDEA	3	complement(46628571..46636760)	12.4476	-0.586921	-1.50204	0.108939	0.999966	1	ENSMGAG00000008843
IMP4	13	15546..19967	167.153	0.375261	1.29707	0.10896	0.999966	1	ENSMGAG00000000778
STK10	15	8407696..8438135	16.1469	-0.485484	-1.40006	0.109182	0.999966	1	ENSMGAG00000003464
TMEM200A	2	complement(59769595..59771064)	10.7634	0.550098	1.46418	0.109236	0.999966	1	ENSMGAG00000015873
CAPS2	1	complement(39441412..39477455)	0.690209	0.85974	1.81471	0.1093	0.999966	1	ENSMGAG00000010816
PGR	1	190952860..190963397	54.3527	0.464905	1.38023	0.10953	0.999966	1	ENSMGAG00000015180
CHN1	7	17312763..17377433	18.0194	-0.433924	-1.3509	0.109571	0.999966	1	ENSMGAG00000009726
gene:ENSMGAG00000016593	Z	complement(14599896..14600371)	0.134235	-4.71164	-26.2026	0.109611	0.999966	1	ENSMGAG00000016593
UTP20	1	48433614..48494150	1.01808	-0.521673	-1.43562	0.109704	0.999966	1	ENSMGAG00000011726
gene:ENSMGAG00000013251	2	61142248..61163641	0.170593	1.37964	2.60204	0.109927	0.999966	1	ENSMGAG00000013251
gene:ENSMGAG00000002092	5	complement(4115915..4200812)	6.33146	-0.557661	-1.47188	0.11013	0.999966	1	ENSMGAG00000002092
ADPRHL2	25	complement(3979139..3983074)	26.2697	-0.371878	-1.29404	0.110136	0.999966	1	ENSMGAG00000003732
gene:ENSMGAG00000009882	11	complement(17656798..17669809)	3.00182	0.658277	1.5782	0.110163	0.999966	1	ENSMGAG00000009882
ATF7IP	1	complement(52582684..52636190)	13.7949	-0.409958	-1.32865	0.110255	0.999966	1	ENSMGAG00000011959
TCEANC	1	complement(131124571..131129681)	4.74757	0.597146	1.51272	0.11033	0.999966	1	ENSMGAG00000014704
gene:ENSMGAG00000007397	6	complement(18999435..19024094)	0.0681943	-4.60716	-24.3721	0.110395	0.999966	1	ENSMGAG00000007397
KLHL28	5	61827316..61833964	10.7058	-0.4785	-1.39329	0.110456	0.999966	1	ENSMGAG00000013816
gene:ENSMGAG00000013503	1	complement(63400515..63436166)	2.00646	-0.583371	-1.49835	0.110474	0.999966	1	ENSMGAG00000013503
GPR153	23	623721..627751	11.8401	0.510481	1.42453	0.11051	0.999966	1	ENSMGAG00000001364
MED1	29	complement(3827008..3836839)	9.24013	-0.413719	-1.33212	0.110652	0.999966	1	ENSMGAG00000005298
gene:ENSMGAG00000007534	4	complement(26785229..26787101)	2.49218	-0.919603	-1.8916	0.110691	0.999966	1	ENSMGAG00000007534
TRAPPC11	4	complement(20633236..20657918)	11.3449	-0.467304	-1.38252	0.110824	0.999966	1	ENSMGAG00000006404
APCDD1	3	47696734..47714927	29.0751	-0.461229	-1.37671	0.110881	0.999966	1	ENSMGAG00000009004
gene:ENSMGAG00000016816	3	37517142..37679559	1.94655	-0.72931	-1.65785	0.110896	0.999966	1	ENSMGAG00000016816
BDKRB1	5	48514823..48516010	5.37209	0.644365	1.56305	0.110969	0.999966	1	ENSMGAG00000015385
WDR81	21	5784765..5791321	14.8893	-0.486772	-1.40131	0.111021	0.999966	1	ENSMGAG00000005231
DISP2	5	complement(5758670..5769052)	0.00774397	4.14953	17.7474	0.111041	0.999966	1	ENSMGAG00000003472
DENND5B	1	60757988..60816291	16.0087	-0.475235	-1.39014	0.111041	0.999966	1	ENSMGAG00000013340
gene:ENSMGAG00000001879	21	complement(398772..407500)	0.0174322	4.14953	17.7474	0.11107	0.999966	1	ENSMGAG00000001879
RALGAPB	22	complement(821926..877518)	4.49956	-0.561178	-1.47547	0.111082	0.999966	1	ENSMGAG00000001329
LGSN	2	89953821..89969177	0.0129555	4.14953	17.7474	0.111117	0.999966	1	ENSMGAG00000013875
CLDN20	2	51993202..51993861	0.0497609	4.14953	17.7474	0.111144	0.999966	1	ENSMGAG00000015858
PCBD1	8	12945563..12947350	62.977	0.521016	1.43497	0.111248	0.999966	1	ENSMGAG00000005157
GTSF1	29	complement(162264..180975)	1.15493	0.915297	1.88596	0.111375	0.999966	1	ENSMGAG00000000685
PNPLA7	19	complement(1572206..1704964)	68.6291	-0.5386	-1.45256	0.111379	0.999966	1	ENSMGAG00000001990
gene:ENSMGAG00000007204	21	7518805..7523682	5.11505	-0.562335	-1.47666	0.111558	0.999966	1	ENSMGAG00000007204
MRAS	7	26611481..26646151	15.6072	0.59608	1.5116	0.11161	0.999966	1	ENSMGAG00000011812
PSME4	2	2964127..3020341	8.79871	-0.426138	-1.34363	0.111612	0.999966	1	ENSMGAG00000002484
DNAJC1	6	18108490..18174972	11.1674	0.524801	1.43873	0.111705	0.999966	1	ENSMGAG00000007281
gene:ENSMGAG00000005812	20	complement(5201821..5202958)	9.845	0.568727	1.48321	0.111736	0.999966	1	ENSMGAG00000005812
WDR66	17	5906611..5919477	0.153209	-1.12964	-2.18804	0.111772	0.999966	1	ENSMGAG00000004544
TFEC	1	26006146..26049720	0.556713	-0.944846	-1.92498	0.111879	0.999966	1	ENSMGAG00000008979
MMP17	17	complement(2811244..2825794)	2.61708	0.614686	1.53122	0.111945	0.999966	1	ENSMGAG00000002046
KANSL3	8	25515171..25534917	12.2529	0.460063	1.3756	0.112703	0.999966	1	ENSMGAG00000002856
ANKRD34B	Z	complement(67937366..67939257)	0.279043	-1.24663	-2.37287	0.112789	0.999966	1	ENSMGAG00000016059
TECTA	26	complement(3724390..3744949)	0.0319235	-1.40745	-2.65268	0.112789	0.999966	1	ENSMGAG00000002190
gene:ENSMGAG00000017296	20	1978282..1984516	0.39283	-1.09874	-2.14168	0.112955	0.999966	1	ENSMGAG00000017296
gene:ENSMGAG00000004303	14	complement(3203393..3204414)	172.242	0.411685	1.33024	0.112964	0.999966	1	ENSMGAG00000004303
ALPL	23	complement(6879039..6886925)	15.5968	0.58947	1.50469	0.113	0.999966	1	ENSMGAG00000007370
NBEA	1	complement(180451505..180551490)	0.901793	-0.718145	-1.64507	0.11318	0.999966	1	ENSMGAG00000015066
gene:ENSMGAG00000003165	19	complement(3350106..3516104)	4.02797	0.603723	1.51963	0.113271	0.999966	1	ENSMGAG00000003165
MXRA5	1	135796101..135812712	1.62276	0.770195	1.7055	0.113411	0.999966	1	ENSMGAG00000014730
ACAN	12	complement(12970780..12995795)	0.0104154	1.97836	3.94045	0.113427	0.999966	1	ENSMGAG00000008691
MARCH5	8	complement(23028197..23035694)	62.3261	0.367539	1.29015	0.113562	0.999966	1	ENSMGAG00000009141
OTUD4	4	complement(11440285..11464101)	7.56974	-0.531982	-1.44591	0.113622	0.999966	1	ENSMGAG00000003693
gene:ENSMGAG00000003895	14	3147677..3148969	1.37526	0.898219	1.86376	0.113709	0.999966	1	ENSMGAG00000003895
WDR17	4	25408689..25438166	0.372741	-0.82429	-1.77066	0.113811	0.999966	1	ENSMGAG00000007014
TCEA3	25	1916607..1922888	0.750971	0.852808	1.80601	0.114136	0.999966	1	ENSMGAG00000001550
SUCO	10	6444228..6473571	18.2318	-0.375799	-1.29756	0.11434	0.999966	1	ENSMGAG00000004336
CAPG	GL424487.1	complement(265..2094)	13.9407	0.687515	1.61051	0.114361	0.999966	1	ENSMGAG00000002450
gene:ENSMGAG00000001243	9	1139953..1141870	0.124632	-1.49608	-2.82075	0.114571	0.999966	1	ENSMGAG00000001243
ABHD12B	5	60812124..60815631	53.1847	0.458935	1.37453	0.114635	0.999966	1	ENSMGAG00000013760
gene:ENSMGAG00000014031	2	complement(105660821..105663881)	70.1648	0.421631	1.33944	0.11465	0.999966	1	ENSMGAG00000014031
gene:ENSMGAG00000012211	3	79058196..79064474	13.8337	-0.544236	-1.45825	0.114704	0.999966	1	ENSMGAG00000012211
HEATR1	2	38399339..38433430	10.9117	-0.388073	-1.30864	0.114719	0.999966	1	ENSMGAG00000011761
MEIOB	16	complement(6355396..6366533)	0.0273735	2.58546	6.00206	0.114826	0.999966	1	ENSMGAG00000005544
FANCA	13	complement(18894310..18928939)	3.30399	-0.563865	-1.47822	0.114961	0.999966	1	ENSMGAG00000008218
ZNF385B	7	15294443..15343846	5.9607	-0.54315	-1.45715	0.115055	0.999966	1	ENSMGAG00000009267
gene:ENSMGAG00000007622	22	11235888..11243360	0.0248028	-4.44458	-21.7747	0.115183	0.999966	1	ENSMGAG00000007622
CPEB3	8	23056280..23129468	0.488548	0.819174	1.7644	0.115526	0.999966	1	ENSMGAG00000009148
SLC9A6	9	3749262..3760839	6.17437	-0.554833	-1.469	0.115538	0.999966	1	ENSMGAG00000003437
gene:ENSMGAG00000003921	11	1047338..1053499	2.40384	0.640637	1.55902	0.115625	0.999966	1	ENSMGAG00000003921
TSHR	5	42531833..42580169	0.0896554	2.06158	4.17443	0.115649	0.999966	1	ENSMGAG00000012948
PTGES	19	complement(5803584..5807384)	13.2545	0.488126	1.40262	0.115667	0.999966	1	ENSMGAG00000005050
gene:ENSMGAG00000007193	5	12024663..12028180	45.3973	0.393908	1.31395	0.115702	0.999966	1	ENSMGAG00000007193
gene:ENSMGAG00000017087	1	150643433..150662515	19.6475	-0.449152	-1.36524	0.115704	0.999966	1	ENSMGAG00000017087
gene:ENSMGAG00000015504	1	complement(140316258..140316967)	0.0956304	-4.44492	-21.7798	0.115758	0.999966	1	ENSMGAG00000015504
FAM110D	25	complement(3015442..3016836)	0.478049	1.08312	2.11861	0.115813	0.999966	1	ENSMGAG00000002555
KPNA7	16	complement(4570022..4576128)	0.0267513	-4.44619	-21.799	0.116001	0.999966	1	ENSMGAG00000004051
AKR1D1	1	57653155..57691942	53.4939	-0.458317	-1.37394	0.116118	0.999966	1	ENSMGAG00000013157
MIGA2	19	5565127..5577388	1.00652	-0.699004	-1.62338	0.116189	0.999966	1	ENSMGAG00000004844
ADAM12	8	complement(35649958..35816832)	10.333	0.565499	1.4799	0.116328	0.999966	1	ENSMGAG00000011743
GGA1	1	50181498..50189982	1.49495	-0.658414	-1.57835	0.11633	0.999966	1	ENSMGAG00000012579
gene:ENSMGAG00000012925	5	41202942..41642606	3.24552	-0.528023	-1.44195	0.116344	0.999966	1	ENSMGAG00000012925
MAFB	22	complement(4890167..4891102)	28.1155	0.644518	1.56322	0.116348	0.999966	1	ENSMGAG00000003300
ABCC8	5	complement(11689030..11756683)	1.9569	-0.532032	-1.44596	0.11646	0.999966	1	ENSMGAG00000006967
TNIP2	4	66026807..66033677	13.598	0.602182	1.51801	0.116826	0.999966	1	ENSMGAG00000013010
gene:ENSMGAG00000011394	8	33197109..33201865	55.7327	-0.507096	-1.42119	0.116836	0.999966	1	ENSMGAG00000011394
gene:ENSMGAG00000002659	8	complement(6085778..6089614)	1.74825	0.680923	1.60316	0.116883	0.999966	1	ENSMGAG00000002659
GUCY1A1	4	1210695..1224162	9.72196	-0.53635	-1.4503	0.116919	0.999966	1	ENSMGAG00000001475
HNF1A	17	complement(9515675..9536958)	0.0184554	4.07731	16.8807	0.116946	0.999966	1	ENSMGAG00000008538
CHFR	17	complement(1557157..1575286)	22.5541	-0.468701	-1.38386	0.116956	0.999966	1	ENSMGAG00000001732
TECPR1	16	complement(1104351..1123996)	4.81911	-0.471996	-1.38703	0.117084	0.999966	1	ENSMGAG00000001540
NIPAL1	4	complement(49339507..49343847)	0.6269	0.982241	1.97553	0.117167	0.999966	1	ENSMGAG00000012031
SYNRG	21	complement(8993842..9022830)	2.83015	-0.563686	-1.47804	0.117174	0.999966	1	ENSMGAG00000008060
RPS21	22	complement(8682447..8685715)	126.084	0.387181	1.30784	0.117217	0.999966	1	ENSMGAG00000005698
gene:ENSMGAG00000005364	16	6262324..6275414	71.6929	-0.469849	-1.38496	0.117342	0.999966	1	ENSMGAG00000005364
CRAT	19	complement(5601219..5610676)	10.3006	-0.471217	-1.38628	0.117344	0.999966	1	ENSMGAG00000004898
CENPL	10	5297117..5299759	24.7031	-0.488986	-1.40346	0.117349	0.999966	1	ENSMGAG00000003416
TMEM150A	8	complement(16507101..16510425)	35.5673	0.443805	1.36019	0.117436	0.999966	1	ENSMGAG00000007070
GLT1D1	17	complement(3825784..3902003)	9.51054	-0.536607	-1.45056	0.11745	0.999966	1	ENSMGAG00000002453
gene:ENSMGAG00000007643	GL426489.1	complement(63..1313)	41.1553	0.574516	1.48918	0.117525	0.999966	1	ENSMGAG00000007643
gene:ENSMGAG00000010784	10	22775336..22781875	0.167197	1.39621	2.63209	0.11756	0.999966	1	ENSMGAG00000010784
GPAM	8	complement(29090697..29116729)	2.81878	-0.621654	-1.53864	0.117802	0.999966	1	ENSMGAG00000010870
gene:ENSMGAG00000001387	12	complement(625175..648318)	22.7122	-0.51623	-1.43021	0.117817	0.999966	1	ENSMGAG00000001387
SERTAD4	2	complement(23015737..23019288)	3.91607	0.621075	1.53802	0.117835	0.999966	1	ENSMGAG00000009913
gene:ENSMGAG00000010103	5	complement(18075680..18292366)	1.1294	-0.587454	-1.50259	0.117885	0.999966	1	ENSMGAG00000010103
SNTA1	22	complement(2580024..2585887)	19.2907	0.487641	1.40215	0.118039	0.999966	1	ENSMGAG00000002243
FUT11	8	complement(18617697..18624815)	35.2758	0.449827	1.36588	0.118094	0.999966	1	ENSMGAG00000006512
PBX1	10	5633127..5654346	14.0416	0.496933	1.41121	0.118109	0.999966	1	ENSMGAG00000003669
XPA	Z	74897678..74900768	4.77997	0.69349	1.61719	0.118116	0.999966	1	ENSMGAG00000008718
CALD1	1	63763473..63993224	32.6779	0.589684	1.50492	0.118221	0.999966	1	ENSMGAG00000013526
DGKZ	5	complement(24357334..24377678)	13.0151	-0.473635	-1.3886	0.118385	0.999966	1	ENSMGAG00000011016
DOLPP1	19	5583128..5595778	6.59663	-0.537659	-1.45161	0.118403	0.999966	1	ENSMGAG00000004883
gene:ENSMGAG00000017214	28	3966160..3977912	15.2242	-0.531686	-1.44562	0.118612	0.999966	1	ENSMGAG00000017214
LRRC74A	5	40476508..40507729	0.045842	2.11126	4.32067	0.118699	0.999966	1	ENSMGAG00000012822
GNB4	11	17521616..17529008	15.7449	-0.447915	-1.36407	0.11887	0.999966	1	ENSMGAG00000002359
gene:ENSMGAG00000001875	GL424345.1	complement(1017..5091)	0.342016	1.23952	2.36121	0.118878	0.999966	1	ENSMGAG00000001875
gene:ENSMGAG00000005960	GL425515.1	2372..6198	1.92302	0.660269	1.58038	0.119029	0.999966	1	ENSMGAG00000005960
gene:ENSMGAG00000016882	GL427561.1	complement(20662..25450)	25.3018	-0.648117	-1.56712	0.119069	0.999966	1	ENSMGAG00000016882
ZSWIM8	8	complement(18508916..18570431)	2.59938	-0.552889	-1.46702	0.119196	0.999966	1	ENSMGAG00000006483
gene:ENSMGAG00000013131	2	complement(58750277..58753338)	188.448	0.383067	1.30411	0.119245	0.999966	1	ENSMGAG00000013131
IKBKB	24	2894152..2905276	56.1076	-0.387335	-1.30798	0.119283	0.999966	1	ENSMGAG00000002921
SGCZ	4	46798163..46837135	0.122434	1.91878	3.78104	0.119291	0.999966	1	ENSMGAG00000011627
gene:ENSMGAG00000009271	4	30808153..30818639	145.979	-0.614931	-1.53148	0.119293	0.999966	1	ENSMGAG00000009271
SLC16A6	20	7268097..7275147	7.26726	0.619022	1.53583	0.119559	0.999966	1	ENSMGAG00000007059
MITD1	1	complement(140259057..140261859)	3.19397	0.654492	1.57406	0.119573	0.999966	1	ENSMGAG00000014785
H6PD	23	3450960..3456776	7.65933	-0.536219	-1.45017	0.119607	0.999966	1	ENSMGAG00000003890
BMP3	4	26563902..26569147	0.0735118	-2.33285	-5.03801	0.119621	0.999966	1	ENSMGAG00000007405
NECAB2	13	177210..210417	4.42578	0.613238	1.52969	0.119632	0.999966	1	ENSMGAG00000000862
SEPT4	21	854574..857644	0.154369	1.46641	2.76333	0.119634	0.999966	1	ENSMGAG00000002059
RPS20	3	complement(61164580..61165729)	97.8682	0.420908	1.33877	0.119654	0.999966	1	ENSMGAG00000010999
gene:ENSMGAG00000002870	GL424564.1	64610..67844	5.39383	0.616097	1.53272	0.119694	0.999966	1	ENSMGAG00000002870
CCDC80	1	87352094..87376489	15.9812	0.414214	1.33257	0.119716	0.999966	1	ENSMGAG00000014340
TUBGCP6	1	complement(20728242..20749976)	4.69445	-0.507577	-1.42166	0.119777	0.999966	1	ENSMGAG00000008013
KCNH2	29	2394608..2398342	0.988436	0.738383	1.6683	0.119968	0.999966	1	ENSMGAG00000001566
HHIPL2	2	17937574..17954826	129.722	0.622541	1.53958	0.119985	0.999966	1	ENSMGAG00000008982
RICTOR	Z	complement(12863604..12910509)	3.94439	-0.484938	-1.39953	0.120023	0.999966	1	ENSMGAG00000003410
CHAD	20	10442868..10447407	0.227469	1.41439	2.66546	0.120122	0.999966	1	ENSMGAG00000009108
SERPINB2	3	complement(15032977..15039290)	73.5937	0.465131	1.38044	0.120366	0.999966	1	ENSMGAG00000004382
BUB1B	5	complement(5994770..6018362)	30.1948	-0.414451	-1.33279	0.120369	0.999966	1	ENSMGAG00000003645
gene:ENSMGAG00000001404	14	19742272..19768077	0.168586	1.08093	2.1154	0.120487	0.999966	1	ENSMGAG00000001404
MFN1	11	complement(17535667..17569437)	23.4775	-0.417249	-1.33538	0.120523	0.999966	1	ENSMGAG00000009801
FA2H	13	850945..859471	4.37905	-0.769905	-1.70516	0.120755	0.999966	1	ENSMGAG00000001307
C12orf50	1	complement(43548445..43561942)	0.895738	0.831582	1.77964	0.12083	0.999966	1	ENSMGAG00000015695
CNRIP1	2	6149024..6153763	0.97318	1.00574	2.00797	0.120892	0.999966	1	ENSMGAG00000004456
TBX19	1	complement(88082776..88089917)	0.224529	-1.18092	-2.26722	0.120913	0.999966	1	ENSMGAG00000014919
SACM1L	6	complement(43733960..43754412)	35.9243	-0.417273	-1.3354	0.120953	0.999966	1	ENSMGAG00000011601
KCNE3	GL424954.1	657..2524	3.10741	0.830567	1.77838	0.121025	0.999966	1	ENSMGAG00000015316
PEX6	2	complement(15834905..15848814)	21.1995	0.413631	1.33203	0.121037	0.999966	1	ENSMGAG00000007129
gene:ENSMGAG00000003059	20	2085620..2090566	2.53591	-0.673927	-1.59541	0.121066	0.999966	1	ENSMGAG00000003059
DTL	2	complement(22306292..22328276)	24.1908	-0.495189	-1.40951	0.121069	0.999966	1	ENSMGAG00000009764
GZMA	Z	17892325..17903447	3.91829	0.852041	1.80505	0.121214	0.999966	1	ENSMGAG00000003872
TSPAN18	5	22813518..22829735	27.1673	0.457806	1.37345	0.121326	0.999966	1	ENSMGAG00000010543
ASNS	6	complement(24982313..24993681)	19.0727	0.428254	1.3456	0.121456	0.999966	1	ENSMGAG00000009747
STEAP3	7	complement(29941645..29949643)	5.54388	0.59259	1.50795	0.121525	0.999966	1	ENSMGAG00000012322
HSPB8	17	complement(10279516..10281446)	7.26961	0.760085	1.69359	0.12155	0.999966	1	ENSMGAG00000009076
SNRNP200	10	3030513..3047747	17.3871	-0.459533	-1.3751	0.121583	0.999966	1	ENSMGAG00000001831
gene:ENSMGAG00000001319	17	796021..802431	18.5953	-0.496306	-1.4106	0.1216	0.999966	1	ENSMGAG00000001319
TGFB3	5	complement(40017076..40025393)	148.216	0.416112	1.33433	0.121601	0.999966	1	ENSMGAG00000012783
TUB	5	complement(9978726..10102667)	10.4243	0.517232	1.43121	0.121674	0.999966	1	ENSMGAG00000006534
ZMIZ1	8	complement(13723563..13756615)	8.51672	-0.468888	-1.38404	0.121875	0.999966	1	ENSMGAG00000005656
ULK1	17	complement(2722531..2791734)	4.93266	-0.522667	-1.43661	0.122051	0.999966	1	ENSMGAG00000001973
ATP8B3	30	1764116..1776745	0.0319955	2.10693	4.30775	0.122187	0.999966	1	ENSMGAG00000002340
gene:ENSMGAG00000002232	22	complement(5274404..5281930)	0.0291259	-4.54452	-23.3366	0.122239	0.999966	1	ENSMGAG00000002232
gene:ENSMGAG00000005484	1	9824636..9847624	0.0953643	1.9758	3.93347	0.122241	0.999966	1	ENSMGAG00000005484
POLRMT	30	complement(2275360..2290509)	17.3337	-0.446667	-1.36289	0.122368	0.999966	1	ENSMGAG00000003243
LRIG1	14	complement(15169996..15220533)	9.02115	-0.505424	-1.41954	0.122372	0.999966	1	ENSMGAG00000009269
gene:ENSMGAG00000009086	15	complement(16856445..16882081)	10.7199	-0.466797	-1.38204	0.12241	0.999966	1	ENSMGAG00000009086
gene:ENSMGAG00000005531	2	complement(113328630..113329982)	3.42347	0.933049	1.90931	0.12271	0.999966	1	ENSMGAG00000005531
gene:ENSMGAG00000013226	4	complement(72606751..72612301)	9.88701	-0.512667	-1.42669	0.123101	0.999966	1	ENSMGAG00000013226
ELMOD1	1	complement(188144578..188163177)	53.206	-0.482655	-1.39731	0.123113	0.999966	1	ENSMGAG00000015155
SEPSECS	4	56782175..56802995	10.1855	-0.488322	-1.40281	0.123178	0.999966	1	ENSMGAG00000012465
gene:ENSMGAG00000009623	5	17008261..17009153	0.0788685	-4.2833	-19.4715	0.1233	0.999966	1	ENSMGAG00000009623
INTS4	1	200964037..200996234	15.1304	-0.409069	-1.32783	0.12356	0.999966	1	ENSMGAG00000015254
SNX13	6	complement(29752475..29794888)	3.32692	-0.524771	-1.4387	0.123578	0.999966	1	ENSMGAG00000010193
gene:ENSMGAG00000015216	1	195564318..195582163	0.32679	1.09566	2.13711	0.123774	0.999966	1	ENSMGAG00000015216
gene:ENSMGAG00000010113	10	complement(21567879..21580189)	52.5491	-0.490832	-1.40526	0.123844	0.999966	1	ENSMGAG00000010113
gene:ENSMGAG00000002566	1	624228..626192	0.0962757	-2.02927	-4.08198	0.124169	0.999966	1	ENSMGAG00000002566
INPP5A	8	38406182..38552943	15.1165	0.465603	1.38089	0.124214	0.999966	1	ENSMGAG00000011902
gene:ENSMGAG00000017163	14	5317292..5320108	0.142343	2.21802	4.65253	0.124262	0.999966	1	ENSMGAG00000017163
gene:ENSMGAG00000005489	9	complement(11301176..11308839)	0.0304508	-4.34899	-20.3786	0.124275	0.999966	1	ENSMGAG00000005489
ACOT13	3	complement(39641249..39647529)	43.1958	0.41782	1.33591	0.124319	0.999966	1	ENSMGAG00000008012
gene:ENSMGAG00000017356	29	2015907..2057455	0.225502	-0.88688	-1.84917	0.124522	0.999966	1	ENSMGAG00000017356
RUNX2	2	115353536..115437305	2.47641	0.902732	1.8696	0.1247	0.999966	1	ENSMGAG00000014267
G0S2	28	3133453..3134078	105.136	0.507436	1.42152	0.124936	0.999966	1	ENSMGAG00000016392
POLR2B	4	complement(30412366..30428790)	42.9177	-0.404237	-1.32339	0.125037	0.999966	1	ENSMGAG00000008481
VAT1L	13	13981245..14018758	17.5743	-0.546077	-1.46011	0.125147	0.999966	1	ENSMGAG00000006649
TEK	Z	72694154..72721180	0.727057	0.707999	1.63354	0.125176	0.999966	1	ENSMGAG00000008692
CENPO	2	complement(110977309..110981935)	22.0285	-0.535478	-1.44942	0.125284	0.999966	1	ENSMGAG00000014151
WNK1	1	61757906..61855513	2.94432	-0.481261	-1.39596	0.125336	0.999966	1	ENSMGAG00000013416
gene:ENSMGAG00000011059	4	40250802..40261843	0.994697	-0.793074	-1.73276	0.125463	0.999966	1	ENSMGAG00000011059
SOS1	2	complement(16431653..16468257)	9.90596	-0.411511	-1.33008	0.125463	0.999966	1	ENSMGAG00000007473
gene:ENSMGAG00000014964	1	complement(202566409..202566834)	2.83383	0.948732	1.93018	0.125525	0.999966	1	ENSMGAG00000014964
SLC12A5	22	11403016..11412409	0.412952	0.885664	1.84761	0.125539	0.999966	1	ENSMGAG00000008544
ANO3	5	complement(2985504..3056088)	0.159534	1.00092	2.00127	0.125584	0.999966	1	ENSMGAG00000001859
KCNV2	Z	29055729..29060449	0.0379093	-2.39225	-5.24977	0.125624	0.999966	1	ENSMGAG00000001039
HEY2	2	complement(61900822..61909115)	43.0488	-0.491371	-1.40578	0.125845	0.999966	1	ENSMGAG00000013281
CLDN1	11	13804832..13813289	102.189	-0.563685	-1.47804	0.125878	0.999966	1	ENSMGAG00000007457
TTC19	21	6759510..6762977	33.4275	0.462625	1.37805	0.12592	0.999966	1	ENSMGAG00000006277
EIF3E	3	complement(82504475..82525067)	52.24	0.365648	1.28846	0.126008	0.999966	1	ENSMGAG00000012388
CDS1	4	27998800..28018948	1.25365	-0.790354	-1.7295	0.126078	0.999966	1	ENSMGAG00000008230
gene:ENSMGAG00000014960	1	168243311..168245404	0.911937	-0.758773	-1.69205	0.126081	0.999966	1	ENSMGAG00000014960
CHRM2	1	complement(58869400..58870842)	0.0816035	1.8622	3.63561	0.126105	0.999966	1	ENSMGAG00000015967
LRRC4C	5	complement(20874061..20875977)	2.45772	-0.644572	-1.56328	0.126143	0.999966	1	ENSMGAG00000015799
ACACA	21	complement(8832021..8929223)	5.54171	-0.493165	-1.40753	0.126199	0.999966	1	ENSMGAG00000007951
SPECC1	21	6667237..6727530	9.51258	-0.436733	-1.35354	0.126244	0.999966	1	ENSMGAG00000006193
TESK2	10	complement(21919373..21977165)	5.64261	-0.529591	-1.44352	0.126324	0.999966	1	ENSMGAG00000010395
IL13RA2	9	complement(2292286..2298386)	7.6289	0.528014	1.44194	0.126349	0.999966	1	ENSMGAG00000002551
gene:ENSMGAG00000017103	5	6928682..6941742	2.84368	-0.827295	-1.77436	0.126407	0.999966	1	ENSMGAG00000017103
CFAP70	16	13684298..13707527	0.951989	-0.637149	-1.55525	0.126427	0.999966	1	ENSMGAG00000009661
WWC2	4	complement(20763935..20831877)	9.72738	-0.420458	-1.33835	0.126531	0.999966	1	ENSMGAG00000006504
WDHD1	5	complement(58927652..58956657)	7.82555	-0.514965	-1.42896	0.126572	0.999966	1	ENSMGAG00000013676
MICU3	4	complement(45642615..45674981)	24.6287	-0.505365	-1.41948	0.126662	0.999966	1	ENSMGAG00000011606
gene:ENSMGAG00000014325	1	complement(86993797..86996511)	0.108047	-4.40664	-21.2095	0.12671	0.999966	1	ENSMGAG00000014325
GUCY1A2	1	188451355..188578742	9.94635	0.549687	1.46377	0.126768	0.999966	1	ENSMGAG00000015159
WFIKKN1	16	14441569..14456433	13.5427	0.472753	1.38775	0.12678	0.999966	1	ENSMGAG00000010094
PRKAA2	10	26635051..26647513	0.049453	-1.61283	-3.0585	0.126904	0.999966	1	ENSMGAG00000011473
C2CD3	1	complement(203486267..203517043)	0.764229	-0.598577	-1.51422	0.12691	0.999966	1	ENSMGAG00000015306
SEPT12	16	13659683..13661674	3.99964	0.69766	1.62187	0.126926	0.999966	1	ENSMGAG00000009617
gene:ENSMGAG00000016880	8	19272461..19285160	4.52989	-0.582662	-1.49761	0.127194	0.999966	1	ENSMGAG00000016880
CPEB2	22	complement(8073953..8129993)	0.783657	0.771768	1.70736	0.127215	0.999966	1	ENSMGAG00000005200
gene:ENSMGAG00000002293	13	complement(1903266..1905646)	12.1519	0.533685	1.44762	0.127288	0.999966	1	ENSMGAG00000002293
IL15	4	10391342..10407019	0.862484	0.893287	1.8574	0.127383	0.999966	1	ENSMGAG00000003247
SLF2	8	complement(25353392..25371244)	2.0332	-0.599326	-1.51501	0.127385	0.999966	1	ENSMGAG00000010255
SEMA3E	1	complement(9474686..9509048)	5.16716	-0.660621	-1.58076	0.127462	0.999966	1	ENSMGAG00000005350
gene:ENSMGAG00000016197	GL429381.1	2263..3642	1.14612	0.808026	1.75081	0.127491	0.999966	1	ENSMGAG00000016197
REG4	10	complement(6733644..6734460)	0.0485398	3.76614	13.6057	0.127641	0.999966	1	ENSMGAG00000004592
gene:ENSMGAG00000002328	GL424455.1	1391..3121	0.0769772	3.76614	13.6057	0.127652	0.999966	1	ENSMGAG00000002328
SLC25A36	11	complement(6377940..6397437)	24.6256	-0.494415	-1.40875	0.127668	0.999966	1	ENSMGAG00000004589
KIF25	2	complement(43064034..43097223)	2.59008	-0.605405	-1.52141	0.127702	0.999966	1	ENSMGAG00000012274
gene:ENSMGAG00000003292	11	4295625..4296941	8.85462	-0.80858	-1.75149	0.127847	0.999966	1	ENSMGAG00000003292
gene:ENSMGAG00000011114	6	complement(39443740..39480481)	0.0328147	3.96996	15.6703	0.12788	0.999966	1	ENSMGAG00000011114
TACR3	4	20017392..20051151	0.024089	3.96996	15.6703	0.127909	0.999966	1	ENSMGAG00000006108
MT4	13	636733..639886	43.4475	-0.659414	-1.57944	0.127947	0.999966	1	ENSMGAG00000000947
IDO2	24	2573595..2578280	0.0491405	2.64451	6.25284	0.127949	0.999966	1	ENSMGAG00000002300
APOLD1	1	49017992..49018663	3.33501	0.654634	1.57422	0.12798	0.999966	1	ENSMGAG00000015712
gene:ENSMGAG00000006229	30	4374520..4379175	9.61657	0.50781	1.42189	0.128052	0.999966	1	ENSMGAG00000006229
CILP	12	complement(17842492..17851980)	0.27115	0.885049	1.84683	0.128159	0.999966	1	ENSMGAG00000009589
AKAP1	21	complement(9379606..9390222)	24.0046	-0.50801	-1.42209	0.128185	0.999966	1	ENSMGAG00000008300
GAP43	1	complement(86043934..86070020)	0.0637068	2.21818	4.65307	0.128261	0.999966	1	ENSMGAG00000014319
gene:ENSMGAG00000013134	2	58773285..58788983	43.069	0.442145	1.35862	0.128456	0.999966	1	ENSMGAG00000013134
HHAT	2	complement(22878205..22969107)	10.3136	-0.466918	-1.38215	0.128547	0.999966	1	ENSMGAG00000009902
RASGRP3	2	complement(31517140..31556127)	11.5321	0.406978	1.32591	0.128585	0.999966	1	ENSMGAG00000010985
MCM2	14	complement(10236398..10247938)	57.0284	-0.476616	-1.39148	0.128661	0.999966	1	ENSMGAG00000007374
gene:ENSMGAG00000005937	GL425503.1	2185..3854	59.7038	0.479463	1.39422	0.12868	0.999966	1	ENSMGAG00000005937
gene:ENSMGAG00000002693	11	complement(3905742..3914577)	8.84446	0.488381	1.40287	0.128697	0.999966	1	ENSMGAG00000002693
NEU4	11	complement(4297895..4299560)	0.0206867	3.92193	15.1571	0.128805	0.999966	1	ENSMGAG00000003321
gene:ENSMGAG00000008054	9	complement(17598593..17722718)	0.884646	0.843305	1.79416	0.128838	0.999966	1	ENSMGAG00000008054
CLGN	4	complement(10021419..10036785)	1.54022	-0.654815	-1.57441	0.128901	0.999966	1	ENSMGAG00000002949
MTSS1	3	complement(89216558..89316903)	7.21169	-0.444489	-1.36083	0.128931	0.999966	1	ENSMGAG00000012682
USP20	19	5841123..5856511	24.1392	-0.460734	-1.37624	0.128969	0.999966	1	ENSMGAG00000005153
PITPNA	21	complement(5655741..5672516)	29.5932	-0.485441	-1.40001	0.129075	0.999966	1	ENSMGAG00000005086
AGXT2	Z	complement(11038918..11051738)	1.08708	-0.723369	-1.65103	0.129086	0.999966	1	ENSMGAG00000003103
GCNT2	3	complement(10561181..10572490)	12.2922	-0.532956	-1.44689	0.1293	0.999966	1	ENSMGAG00000003643
LAMP5	2	complement(13621062..13631410)	4.13442	0.612365	1.52876	0.129367	0.999966	1	ENSMGAG00000006392
ACER1	30	complement(1154316..1163206)	0.0261911	3.83341	14.2552	0.129577	0.999966	1	ENSMGAG00000001715
ATAD2	3	complement(88729099..88758456)	4.84111	-0.477449	-1.39228	0.129649	0.999966	1	ENSMGAG00000012599
gene:ENSMGAG00000016503	2	complement(40987995..41035638)	9.30733	0.543784	1.45779	0.129674	0.999966	1	ENSMGAG00000016503
DPP8	12	complement(18069175..18088039)	13.6322	-0.435032	-1.35194	0.129694	0.999966	1	ENSMGAG00000009649
CDH22	22	complement(11460953..11500188)	0.799717	-0.762793	-1.69677	0.129821	0.999966	1	ENSMGAG00000008168
STUB1	16	13752148..13754971	52.7865	0.437329	1.35409	0.129835	0.999966	1	ENSMGAG00000009734
gene:ENSMGAG00000014925	GL427334.1	1322..2056	14.9975	0.534023	1.44796	0.12994	0.999966	1	ENSMGAG00000014925
FEZ1	26	complement(42189..50270)	19.2938	0.494129	1.40847	0.130002	0.999966	1	ENSMGAG00000000696
gene:ENSMGAG00000003112	15	complement(7924131..7926933)	0.0335765	-2.22886	-4.68765	0.130013	0.999966	1	ENSMGAG00000003112
MASP2	23	complement(4101408..4257518)	0.18294	1.22393	2.33582	0.130187	0.999966	1	ENSMGAG00000004578
gene:ENSMGAG00000007578	6	complement(19754072..19801648)	0.33703	0.85553	1.80942	0.130362	0.999966	1	ENSMGAG00000007578
SLC35B4	1	1480877..1492406	58.9926	-0.506602	-1.4207	0.130365	0.999966	1	ENSMGAG00000003700
gene:ENSMGAG00000017392	10	5921823..5928720	0.0738565	3.76605	13.6048	0.130367	0.999966	1	ENSMGAG00000017392
NRXN1	2	complement(10341949..11007110)	2.00991	0.542231	1.45622	0.130417	0.999966	1	ENSMGAG00000005777
IGF2R	2	complement(46655549..46702632)	7.48531	-0.436427	-1.35325	0.130481	0.999966	1	ENSMGAG00000012441
RTTN	3	43292972..43378540	1.44059	-0.56029	-1.47457	0.130484	0.999966	1	ENSMGAG00000008306
CEL	19	6947812..6953308	0.257698	1.00356	2.00494	0.130543	0.999966	1	ENSMGAG00000006148
SAG	11	complement(2280570..2294634)	0.031083	-4.28339	-19.4728	0.130571	0.999966	1	ENSMGAG00000001696
ACSM3	16	15706717..15715556	0.0191991	2.58508	6.00049	0.130614	0.999966	1	ENSMGAG00000010342
PRPH2	2	complement(23224857..23234098)	0.0194189	-4.28339	-19.4728	0.130631	0.999966	1	ENSMGAG00000010002
SPG11	12	complement(19850131..19875609)	5.37231	-0.438324	-1.35503	0.130692	0.999966	1	ENSMGAG00000010324
RAP1A	28	3247949..3255848	86.1296	0.426721	1.34417	0.130719	0.999966	1	ENSMGAG00000004577
gene:ENSMGAG00000009780	GL429113.1	complement(3805..5464)	0.103808	2.11793	4.34071	0.130895	0.999966	1	ENSMGAG00000009780
gene:ENSMGAG00000015783	5	complement(7331135..7332674)	9.45366	0.549889	1.46397	0.130926	0.999966	1	ENSMGAG00000015783
gene:ENSMGAG00000014611	1	complement(118057770..118129120)	7.05192	-0.425785	-1.3433	0.130964	0.999966	1	ENSMGAG00000014611
gene:ENSMGAG00000016041	GL424904.1	complement(11375..12205)	1.42682	0.834424	1.78314	0.130991	0.999966	1	ENSMGAG00000016041
GABRR3	1	complement(95920199..95941499)	0.0190398	3.76633	13.6075	0.1311	0.999966	1	ENSMGAG00000014427
TBL2	21	complement(146551..150080)	59.918	0.405192	1.32427	0.131134	0.999966	1	ENSMGAG00000001178
PDCD7	12	17799411..17802846	22.5666	0.419945	1.33788	0.131151	0.999966	1	ENSMGAG00000009532
ARID2	1	32175390..32281328	0.981914	-0.536689	-1.45064	0.131183	0.999966	1	ENSMGAG00000009656
ZFYVE26	5	complement(29937625..29979496)	1.14745	-0.498072	-1.41233	0.13142	0.999966	1	ENSMGAG00000011924
gene:ENSMGAG00000017209	Z	complement(56983902..57020658)	0.0804305	3.76614	13.6057	0.131437	0.999966	1	ENSMGAG00000017209
NFIX	GL424554.1	complement(1757..2302)	161.401	0.416532	1.33471	0.131582	0.999966	1	ENSMGAG00000002720
STK32C	8	complement(38177060..38184793)	0.808646	-0.837462	-1.7869	0.131647	0.999966	1	ENSMGAG00000011859
NUDT3	GL424557.1	39063..48956	1.18115	0.883591	1.84496	0.132029	0.999966	1	ENSMGAG00000002783
ARPC5	10	2877646..2882958	10.7512	0.530296	1.44423	0.132094	0.999966	1	ENSMGAG00000001510
COMTD1	8	17386903..17392816	82.8323	0.36563	1.28844	0.132282	0.999966	1	ENSMGAG00000006025
TMEM115	14	complement(1418514..1419851)	118.247	0.386577	1.30729	0.132436	0.999966	1	ENSMGAG00000001499
gene:ENSMGAG00000017073	19	complement(3275724..3305897)	4.61457	0.652684	1.57209	0.132458	0.999966	1	ENSMGAG00000017073
ADAM9	24	2541231..2555700	7.75383	-0.491439	-1.40585	0.132666	0.999966	1	ENSMGAG00000002335
TIMM50	GL426281.1	41..993	34.1935	0.487556	1.40207	0.132765	0.999966	1	ENSMGAG00000007334
ACPP	6	43052433..43063919	0.0678476	-1.94952	-3.86247	0.133168	0.999966	1	ENSMGAG00000011471
MYO5C	12	8643333..8671058	0.872308	-0.63892	-1.55716	0.13338	0.999966	1	ENSMGAG00000006309
RNF19B	25	5070879..5076392	5.5747	0.502732	1.41689	0.133387	0.999966	1	ENSMGAG00000005030
DHTKD1	1	complement(8758916..8774429)	119.91	-0.55933	-1.47358	0.133412	0.999966	1	ENSMGAG00000004700
ZBED1	1	136188002..136190089	30.048	-0.37371	-1.29568	0.133424	0.999966	1	ENSMGAG00000015483
DTNB	2	complement(110067564..110211534)	7.6249	-0.521943	-1.43589	0.1335	0.999966	1	ENSMGAG00000014080
PPIP5K2	Z	complement(52521081..52535447)	0.567827	-0.793036	-1.73272	0.133522	0.999966	1	ENSMGAG00000006847
gene:ENSMGAG00000012462	1	50240785..50256108	43.2676	0.32946	1.25654	0.133664	0.999966	1	ENSMGAG00000012462
B3GNT5	11	complement(16328345..16329469)	3.28068	-0.596487	-1.51203	0.13367	0.999966	1	ENSMGAG00000016047
gene:ENSMGAG00000007963	17	complement(8903168..8957046)	4.26988	-0.433781	-1.35077	0.133696	0.999966	1	ENSMGAG00000007963
CXCL12	8	complement(21264987..21278258)	20.3882	0.479992	1.39474	0.133822	0.999966	1	ENSMGAG00000008155
SLC35F2	1	188066710..188078539	8.56927	-0.575999	-1.49071	0.13398	0.999966	1	ENSMGAG00000015153
ZFPM2	3	81401200..81411272	0.920172	0.714415	1.64082	0.134	0.999966	1	ENSMGAG00000012374
FGD6	1	complement(46174824..46230643)	4.05946	-0.455329	-1.3711	0.134065	0.999966	1	ENSMGAG00000011399
PHYH	1	8252832..8263614	107.236	-0.382737	-1.30381	0.134079	0.999966	1	ENSMGAG00000004924
gene:ENSMGAG00000002606	GL424525.1	42897..43885	9.88491	0.570877	1.48543	0.134131	0.999966	1	ENSMGAG00000002606
EXOC3L1	13	1976029..1983311	2.46692	0.562241	1.47656	0.134139	0.999966	1	ENSMGAG00000002565
CCM2	6	complement(3522096..3530090)	33.6391	-0.457095	-1.37277	0.13424	0.999966	1	ENSMGAG00000003024
gene:ENSMGAG00000005142	30	complement(3410641..3418800)	4.43425	-0.532251	-1.44618	0.134311	0.999966	1	ENSMGAG00000005142
gene:ENSMGAG00000017193	GL424516.1	complement(31592..32031)	1.34515	0.923299	1.89645	0.134347	0.999966	1	ENSMGAG00000017193
ANKRD17	4	complement(32632689..32676543)	9.45357	-0.383166	-1.3042	0.13443	0.999966	1	ENSMGAG00000010121
TPCN1	17	complement(13201363..13246017)	29.2385	-0.387874	-1.30846	0.134452	0.999966	1	ENSMGAG00000010154
SMCO3	1	48842844..48843521	1.3539	0.876088	1.83539	0.134508	0.999966	1	ENSMGAG00000011828
CNTN3	14	complement(17671969..17720179)	0.106781	1.17326	2.2552	0.13458	0.999966	1	ENSMGAG00000009709
KDELC2	1	187859253..187867194	36.9131	0.438681	1.35536	0.134645	0.999966	1	ENSMGAG00000015147
gene:ENSMGAG00000009945	16	15268212..15282153	9.74469	-0.477966	-1.39278	0.134751	0.999966	1	ENSMGAG00000009945
MCMDC2	3	65499148..65508060	0.0690038	-1.72105	-3.29676	0.134846	0.999966	1	ENSMGAG00000011263
TSPAN10	20	5852471..5853798	0.687391	1.15371	2.22485	0.134868	0.999966	1	ENSMGAG00000006414
SEC61G	6	complement(53250465..53254045)	175.463	0.366544	1.28926	0.134915	0.999966	1	ENSMGAG00000012352
CMTR1	2	complement(30564920..30586402)	2.94782	-0.591972	-1.50731	0.13494	0.999966	1	ENSMGAG00000010739
PTPRS	30	4028096..4115328	5.51483	-0.465681	-1.38097	0.13495	0.999966	1	ENSMGAG00000005856
KDM2B	17	complement(5685968..5781633)	18.3759	-0.400628	-1.32008	0.135065	0.999966	1	ENSMGAG00000004301
CREB3L3	30	complement(2165962..2168512)	0.663056	0.850866	1.80358	0.135072	0.999966	1	ENSMGAG00000002752
TSC2	16	6564270..6592350	2.9915	-0.465499	-1.38079	0.135096	0.999966	1	ENSMGAG00000005868
DMXL2	12	complement(9084626..9128324)	2.43283	-0.473998	-1.38895	0.135152	0.999966	1	ENSMGAG00000006618
ENTPD4	24	1197993..1204429	3.88046	-0.572156	-1.48674	0.135448	0.999966	1	ENSMGAG00000001293
RPL30	3	complement(78124747..78126880)	357.9	0.348829	1.27353	0.135497	0.999966	1	ENSMGAG00000012160
DSEL	3	44099893..44103543	0.812512	-0.61259	-1.529	0.135601	0.999966	1	ENSMGAG00000015445
gene:ENSMGAG00000016564	Z	complement(74960410..74963277)	2.36999	0.802245	1.74381	0.135664	0.999966	1	ENSMGAG00000016564
DCAF1	14	complement(2300753..2346811)	6.89514	-0.466796	-1.38204	0.135664	0.999966	1	ENSMGAG00000002240
gene:ENSMGAG00000008093	GL427430.1	1055..3325	0.509537	1.16622	2.24422	0.135678	0.999966	1	ENSMGAG00000008093
NUF2	10	5382845..5394961	45.9462	-0.447406	-1.36359	0.135821	0.999966	1	ENSMGAG00000003571
ATP2B4	2	complement(19234055..19251095)	32.4071	-0.425336	-1.34289	0.13583	0.999966	1	ENSMGAG00000009289
MMP7	1	190304697..190309276	125.643	1.14629	2.21344	0.135933	0.999966	1	ENSMGAG00000015172
gene:ENSMGAG00000011457	4	complement(43951306..43999582)	0.844368	-0.795047	-1.73513	0.13601	0.999966	1	ENSMGAG00000011457
FBXL7	3	complement(24668428..24674541)	6.55503	-0.492504	-1.40688	0.136028	0.999966	1	ENSMGAG00000005758
ERCC4	16	638682..648268	4.16353	-0.55851	-1.47275	0.136064	0.999966	1	ENSMGAG00000000950
gene:ENSMGAG00000012012	5	29982753..29985111	2.48608	0.64238	1.5609	0.1365	0.999966	1	ENSMGAG00000012012
NRDE2	5	complement(45895977..45910687)	1.96408	-0.519177	-1.43314	0.136513	0.999966	1	ENSMGAG00000013052
PIP5K1C	30	811824..828837	21.0145	-0.462672	-1.37809	0.136551	0.999966	1	ENSMGAG00000001308
MAPK14	28	134706..149781	7.60422	-0.571811	-1.48639	0.136578	0.999966	1	ENSMGAG00000000790
FBXO39	21	10299087..10302010	0.954466	-0.83175	-1.77984	0.136718	0.999966	1	ENSMGAG00000008805
FSD2	12	complement(10956196..10972727)	0.470277	-0.759579	-1.693	0.13675	0.999966	1	ENSMGAG00000007666
gene:ENSMGAG00000012400	7	complement(31009069..31015215)	4.47779	0.876732	1.83621	0.136915	0.999966	1	ENSMGAG00000012400
gene:ENSMGAG00000014886	1	complement(149152170..149161190)	0.165862	-2.54258	-5.82628	0.137086	0.999966	1	ENSMGAG00000014886
SNORC	11	complement(2435703..2442058)	0.53999	-1.38264	-2.60745	0.137142	0.999966	1	ENSMGAG00000001767
gene:ENSMGAG00000009256	Z	complement(24487006..24499856)	1.91877	0.628458	1.54591	0.137151	0.999966	1	ENSMGAG00000009256
gene:ENSMGAG00000008582	5	complement(14775483..14832573)	0.0101271	-2.65115	-6.28167	0.137254	0.999966	1	ENSMGAG00000008582
CDR2	16	complement(9014151..9022764)	77.5813	-0.453037	-1.36892	0.137497	0.999966	1	ENSMGAG00000008116
gene:ENSMGAG00000014193	2	complement(112567137..112590099)	0.00850561	-4.35518	-20.4663	0.137596	0.999966	1	ENSMGAG00000014193
CORO2B	12	19354763..19367020	155.988	-0.528395	-1.44232	0.137606	0.999966	1	ENSMGAG00000010149
STN1	8	complement(26444631..26468195)	7.22592	-0.496254	-1.41055	0.137647	0.999966	1	ENSMGAG00000010550
gene:ENSMGAG00000016664	1	complement(150811498..150835647)	15.5645	-0.542897	-1.45689	0.137688	0.999966	1	ENSMGAG00000016664
NUBP2	16	complement(13837258..13971682)	10.2505	0.44714	1.36334	0.137694	0.999966	1	ENSMGAG00000009788
GPRIN3	4	complement(15849734..15851959)	0.316835	-0.860793	-1.81604	0.137751	0.999966	1	ENSMGAG00000016247
TMEM192	4	complement(4428406..4441103)	26.8745	-0.479157	-1.39393	0.137825	0.999966	1	ENSMGAG00000002167
CCDC60	17	complement(10234341..10246125)	0.227878	-1.1592	-2.23334	0.137889	0.999966	1	ENSMGAG00000009046
RBFOX3	20	5364522..5369351	0.461826	1.02004	2.02797	0.137896	0.999966	1	ENSMGAG00000005600
gene:ENSMGAG00000002661	9	2536405..2541353	5.55455	0.626456	1.54377	0.138069	0.999966	1	ENSMGAG00000002661
YEATS2	11	complement(762603..802813)	4.85322	-0.471923	-1.38696	0.138182	0.999966	1	ENSMGAG00000000887
gene:ENSMGAG00000006141	15	complement(12635717..12809546)	453.432	0.394224	1.31424	0.138264	0.999966	1	ENSMGAG00000006141
VSTM5	1	193840749..193844276	8.34948	-0.585585	-1.50065	0.138289	0.999966	1	ENSMGAG00000015203
ZNF692	18	complement(181476..187501)	1.25331	0.624512	1.54169	0.138308	0.999966	1	ENSMGAG00000000638
VSTM2L	24	complement(4078652..4080639)	2.36471	0.764369	1.69863	0.138328	0.999966	1	ENSMGAG00000003701
gene:ENSMGAG00000017012	1	complement(143464054..143466397)	0.0754761	-2.61801	-6.13901	0.138524	0.999966	1	ENSMGAG00000017012
gene:ENSMGAG00000005832	21	complement(6200760..6203434)	6.62322	-0.585897	-1.50097	0.138549	0.999966	1	ENSMGAG00000005832
STXBP4	20	complement(9178157..9217805)	8.14273	-0.457492	-1.37315	0.138598	0.999966	1	ENSMGAG00000008400
TBCD	20	complement(3192621..3301716)	24.9823	-0.485299	-1.39988	0.1386	0.999966	1	ENSMGAG00000003528
SLC37A3	1	complement(57860812..57874090)	5.45601	-0.539091	-1.45306	0.138639	0.999966	1	ENSMGAG00000013196
IKZF3	GL424564.1	complement(16976..35199)	0.709083	0.858946	1.81371	0.138693	0.999966	1	ENSMGAG00000002822
gene:ENSMGAG00000016590	1	127718699..127727465	11.3462	-0.595699	-1.5112	0.138777	0.999966	1	ENSMGAG00000016590
SP1	GL424185.1	complement(3..11217)	4.52751	0.552798	1.46693	0.138832	0.999966	1	ENSMGAG00000007176
C5	8	complement(8779651..8810947)	0.0207074	-2.23847	-4.71895	0.13893	0.999966	1	ENSMGAG00000003474
gene:ENSMGAG00000016548	1	200606919..200616773	1.38975	-0.75265	-1.68488	0.138979	0.999966	1	ENSMGAG00000016548
gene:ENSMGAG00000016394	W	197546..200095	1.20615	-0.76726	-1.70203	0.139102	0.999966	1	ENSMGAG00000016394
MB	1	52990197..52993830	0.372851	-1.05973	-2.08454	0.139141	0.999966	1	ENSMGAG00000012726
gene:ENSMGAG00000013807	1	69550518..69606496	49.1727	-0.436617	-1.35343	0.139172	0.999966	1	ENSMGAG00000013807
PRPSAP2	16	5431404..5443578	27.751	-0.463933	-1.3793	0.139227	0.999966	1	ENSMGAG00000005004
STOML3	1	complement(170791250..170796421)	0.896222	0.850353	1.80294	0.139262	0.999966	1	ENSMGAG00000015047
gene:ENSMGAG00000007467	14	10275767..10343443	96.8071	-0.393467	-1.31355	0.139272	0.999966	1	ENSMGAG00000007467
CDK14	6	22004355..22254889	1.80337	0.615584	1.53218	0.139355	0.999966	1	ENSMGAG00000008520
MSRB3	1	35720219..35786256	7.36765	0.52564	1.43957	0.139385	0.999966	1	ENSMGAG00000010316
gene:ENSMGAG00000003218	7	2723331..2728341	1.1042	-0.671102	-1.59229	0.139407	0.999966	1	ENSMGAG00000003218
TAT	13	20009073..20015675	0.18641	-1.27117	-2.41357	0.139448	0.999966	1	ENSMGAG00000008977
gene:ENSMGAG00000013298	4	complement(73716544..73726583)	1.71195	-0.712242	-1.63835	0.139564	0.999966	1	ENSMGAG00000013298
PRELP	2	complement(19385238..19386934)	5.21705	0.660928	1.5811	0.139573	0.999966	1	ENSMGAG00000009368
HACL1	6	complement(34489218..34503358)	7.69914	-0.466428	-1.38168	0.139617	0.999966	1	ENSMGAG00000010817
gene:ENSMGAG00000016627	29	complement(995067..995505)	1.26422	1.4244	2.68403	0.139636	0.999966	1	ENSMGAG00000016627
gene:ENSMGAG00000014835	1	complement(144004683..144021093)	32.0258	0.446753	1.36297	0.139645	0.999966	1	ENSMGAG00000014835
PLEKHA8	6	34417796..34430348	15.6544	-0.493333	-1.40769	0.13965	0.999966	1	ENSMGAG00000010790
ABAT	16	complement(10402940..10426488)	21.1276	-0.414922	-1.33323	0.139713	0.999966	1	ENSMGAG00000008563
COL20A1	22	9563385..9735782	0.788959	-0.689015	-1.61218	0.139747	0.999966	1	ENSMGAG00000006260
TPM3	2	57972468..57992514	81.3953	0.386026	1.30679	0.139919	0.999966	1	ENSMGAG00000013097
gene:ENSMGAG00000002519	20	complement(322948..704491)	0.024124	1.35598	2.55972	0.140002	0.999966	1	ENSMGAG00000002519
CALHM6	2	complement(65962056..65964709)	0.18346	1.32008	2.4968	0.140002	0.999966	1	ENSMGAG00000013384
TPM1	12	complement(3594797..3611927)	243.225	0.42048	1.33837	0.14019	0.999966	1	ENSMGAG00000004207
TMEM35B	25	4267066..4267447	20.1654	0.492721	1.4071	0.140259	0.999966	1	ENSMGAG00000004265
ARL16	20	5163471..5164350	5.0107	0.569815	1.48433	0.140329	0.999966	1	ENSMGAG00000005714
ART4	1	48836019..48840594	2.14272	0.633579	1.55141	0.14071	0.999966	1	ENSMGAG00000011827
TNFRSF13B	16	complement(4950248..4953543)	0.532206	0.989525	1.98553	0.141036	0.999966	1	ENSMGAG00000004358
gene:ENSMGAG00000017041	8	33208398..33213374	47.4591	-0.454331	-1.37015	0.141052	0.999966	1	ENSMGAG00000017041
NT5DC4	GL428330.1	complement(7234..9345)	0.194038	1.26843	2.409	0.141283	0.999966	1	ENSMGAG00000016578
JPH1	3	complement(68448134..68521485)	1.38285	0.673979	1.59547	0.141305	0.999966	1	ENSMGAG00000011560
FCHSD1	14	1850572..1856189	11.8298	0.483571	1.3982	0.141348	0.999966	1	ENSMGAG00000002002
RNF6	1	184218866..184224047	39.7407	-0.433616	-1.35061	0.141364	0.999966	1	ENSMGAG00000015109
gene:ENSMGAG00000012497	5	37380283..37418093	22.9749	-0.433121	-1.35015	0.141369	0.999966	1	ENSMGAG00000012497
FAM221A	6	31730839..31736261	0.0345485	-4.10163	-17.1678	0.14147	0.999966	1	ENSMGAG00000010545
gene:ENSMGAG00000005563	23	complement(5002585..5003680)	0.0769075	2.27501	4.84002	0.141587	0.999966	1	ENSMGAG00000005563
gene:ENSMGAG00000013608	5	complement(57335028..57336926)	0.0761518	2.37732	5.19571	0.14168	0.999966	1	ENSMGAG00000013608
ITIH2	1	4450920..4475813	0.510302	-0.772969	-1.70878	0.141853	0.999966	1	ENSMGAG00000004333
BLK	2	113107705..113119692	1.93503	0.686548	1.60943	0.141861	0.999966	1	ENSMGAG00000014205
RIPOR3	22	14481195..14512161	10.8726	0.498489	1.41273	0.142004	0.999966	1	ENSMGAG00000009391
GABPB2	27	805153..806995	18.2987	0.465123	1.38044	0.142033	0.999966	1	ENSMGAG00000001113
gene:ENSMGAG00000007038	10	complement(11366330..11377125)	18.1924	-0.361183	-1.28448	0.142145	0.999966	1	ENSMGAG00000007038
gene:ENSMGAG00000016848	3	78794659..78841744	0.766205	-0.747141	-1.67846	0.142212	0.999966	1	ENSMGAG00000016848
gene:ENSMGAG00000002821	Z	complement(9567980..9574115)	9.56437	-0.607438	-1.52355	0.142354	0.999966	1	ENSMGAG00000002821
gene:ENSMGAG00000012873	1	complement(54879724..54895476)	7.59001	-0.50802	-1.4221	0.142376	0.999966	1	ENSMGAG00000012873
CALB2	13	1330610..1334218	7.95755	0.61771	1.53444	0.142569	0.999966	1	ENSMGAG00000001775
RALGPS2	10	4347986..4459906	50.4263	-0.443859	-1.36024	0.142668	0.999966	1	ENSMGAG00000002513
gene:ENSMGAG00000007657	16	8394078..8470631	7.04116	-0.450086	-1.36612	0.14272	0.999966	1	ENSMGAG00000007657
MAN1C1	25	complement(2036775..2077701)	9.25119	0.45688	1.37257	0.142736	0.999966	1	ENSMGAG00000001802
ACBD7	6	20806863..20807662	14.1532	0.522302	1.43624	0.142767	0.999966	1	ENSMGAG00000008219
BEST1	5	16966385..16974000	0.821277	1.02041	2.02849	0.142802	0.999966	1	ENSMGAG00000009495
TACR2	8	complement(12291470..12297128)	0.0429283	2.21958	4.65757	0.142961	0.999966	1	ENSMGAG00000004484
PCIF1	GL428845.1	2132..9718	8.47639	0.443744	1.36013	0.143035	0.999966	1	ENSMGAG00000008388
HIPK2	1	57141901..57225909	10.5598	0.444147	1.36051	0.143171	0.999966	1	ENSMGAG00000013120
CLSPN	25	4084368..4097289	2.18435	-0.593518	-1.50892	0.143338	0.999966	1	ENSMGAG00000003920
YAF2	1	complement(30404570..30409438)	6.73368	0.541632	1.45562	0.143349	0.999966	1	ENSMGAG00000009431
gene:ENSMGAG00000017241	1	complement(62322391..62343326)	0.0757836	-2.0913	-4.26132	0.14337	0.999966	1	ENSMGAG00000017241
gene:ENSMGAG00000016998	8	complement(22274888..22277881)	1.85263	-0.766446	-1.70107	0.143466	0.999966	1	ENSMGAG00000016998
gene:ENSMGAG00000016899	11	15911824..15918584	0.0961869	-1.69708	-3.24245	0.143521	0.999966	1	ENSMGAG00000016899
NMU	4	47728049..47742585	1.82206	1.02223	2.03105	0.14356	0.999966	1	ENSMGAG00000011738
KIAA1211	4	complement(47495405..47550138)	0.0469894	1.30288	2.46721	0.143588	0.999966	1	ENSMGAG00000011693
SYT2	28	707287..710943	0.461024	1.12563	2.18196	0.143863	0.999966	1	ENSMGAG00000001598
B3GNT2	2	complement(8430734..8431927)	49.7522	-0.423483	-1.34116	0.143934	0.999966	1	ENSMGAG00000015914
gene:ENSMGAG00000000676	27	406365..407348	0.0945621	3.77722	13.7106	0.144027	0.999966	1	ENSMGAG00000000676
gene:ENSMGAG00000001812	16	2298438..2301805	0.0422512	3.77722	13.7106	0.14403	0.999966	1	ENSMGAG00000001812
SPARCL1	4	26797960..26805705	0.0116984	3.77722	13.7106	0.14405	0.999966	1	ENSMGAG00000007541
gene:ENSMGAG00000005713	8	14704737..14736115	3.0595	-0.493567	-1.40792	0.14407	0.999966	1	ENSMGAG00000005713
gene:ENSMGAG00000014223	2	113280718..113283506	0.0386845	3.77722	13.7106	0.144104	0.999966	1	ENSMGAG00000014223
TMEM255B	1	complement(144395924..144461366)	0.389144	1.01942	2.0271	0.144139	0.999966	1	ENSMGAG00000014842
UBXN10	23	5005638..5006483	1.41014	-0.738816	-1.66881	0.14425	0.999966	1	ENSMGAG00000015759
FGF12	11	13304171..13369778	14.9424	0.537252	1.45121	0.144313	0.999966	1	ENSMGAG00000007348
gene:ENSMGAG00000009227	Z	complement(2366855..2369963)	0.260609	1.55971	2.94795	0.144326	0.999966	1	ENSMGAG00000009227
CDKN1B	1	72001890..72002363	43.0329	0.462544	1.37797	0.144423	0.999966	1	ENSMGAG00000013859
INSIG1	6	7502949..7507419	282.474	0.506507	1.42061	0.144425	0.999966	1	ENSMGAG00000004902
RPL26	15	8743278..8748081	201.558	0.328798	1.25597	0.144571	0.999966	1	ENSMGAG00000003585
NKAPD1	26	complement(6587383..6592116)	3.60122	0.565108	1.4795	0.144606	0.999966	1	ENSMGAG00000004621
ORAOV1	5	complement(17672703..17677205)	10.4077	0.570395	1.48493	0.144628	0.999966	1	ENSMGAG00000009922
gene:ENSMGAG00000007630	GL426463.1	complement(3..1022)	82.3352	0.386889	1.30757	0.144744	0.999966	1	ENSMGAG00000007630
NETO2	13	7498925..7514621	36.1149	-0.441997	-1.35848	0.144816	0.999966	1	ENSMGAG00000005178
gene:ENSMGAG00000017300	Z	complement(35832366..35840787)	0.746745	-0.752818	-1.68508	0.144977	0.999966	1	ENSMGAG00000017300
TADA3	14	complement(12044957..12046864)	13.9994	0.479302	1.39407	0.145027	0.999966	1	ENSMGAG00000008391
SH3D19	4	complement(13666105..13692261)	5.89148	-0.474369	-1.38931	0.145029	0.999966	1	ENSMGAG00000004234
ASAP3	25	complement(1886077..1892372)	1.59045	0.65089	1.57014	0.145056	0.999966	1	ENSMGAG00000001477
SLC9A3R2	16	6535123..6555889	68.0573	0.405528	1.32457	0.14508	0.999966	1	ENSMGAG00000005833
gene:ENSMGAG00000013669	1	complement(73515316..73522033)	0.0312026	-4.10069	-17.1566	0.145097	0.999966	1	ENSMGAG00000013669
gene:ENSMGAG00000009064	13	20085678..20090031	38.8786	0.413671	1.33207	0.145099	0.999966	1	ENSMGAG00000009064
FKBP6	21	complement(268230..274613)	9.94939	0.594973	1.51044	0.145217	0.999966	1	ENSMGAG00000016672
gene:ENSMGAG00000005354	28	complement(1157444..1159587)	0.039725	-4.10069	-17.1566	0.145231	0.999966	1	ENSMGAG00000005354
BTG2	2	complement(19496869..19498378)	83.4566	0.463429	1.37881	0.145322	0.999966	1	ENSMGAG00000006421
PDCL	19	complement(8667449..8669351)	18.2343	-0.423451	-1.34113	0.145344	0.999966	1	ENSMGAG00000007971
CCDC88C	5	complement(46335966..46414254)	4.90831	0.485784	1.40035	0.145388	0.999966	1	ENSMGAG00000013084
gene:ENSMGAG00000010163	GL429676.1	complement(78..15423)	1.82559	-0.578529	-1.49333	0.145389	0.999966	1	ENSMGAG00000010163
ATP6	MT	8018..8701	1280.24	-0.402189	-1.32151	0.145492	0.999966	1	ENSMGAG00000017482
FAM196B	15	3492959..3500407	0.0237069	-4.17157	-18.0205	0.145611	0.999966	1	ENSMGAG00000002082
gene:ENSMGAG00000004186	4	complement(13576126..13633782)	5.61553	-0.441771	-1.35827	0.145661	0.999966	1	ENSMGAG00000004186
gene:ENSMGAG00000017288	7	complement(440750..444042)	0.0294389	-4.17157	-18.0205	0.145667	0.999966	1	ENSMGAG00000017288
ASIP	22	complement(1657305..1661751)	0.073522	-4.10108	-17.1613	0.145791	0.999966	1	ENSMGAG00000002166
PP2D1	6	36295615..36301159	0.211636	1.0524	2.07397	0.146087	0.999966	1	ENSMGAG00000010957
ASPM	10	complement(8501315..8529274)	1.87893	-0.543676	-1.45768	0.146151	0.999966	1	ENSMGAG00000005648
MED23	2	59282707..59315861	19.1324	-0.382441	-1.30355	0.146211	0.999966	1	ENSMGAG00000013167
NEK2	2	22448122..22454350	44.6636	-0.432632	-1.34969	0.146231	0.999966	1	ENSMGAG00000009820
TXNDC16	5	complement(61013180..61049819)	15.8106	-0.451512	-1.36747	0.146348	0.999966	1	ENSMGAG00000013791
gene:ENSMGAG00000005433	21	6209757..6211402	0.493674	1.62219	3.07842	0.14635	0.999966	1	ENSMGAG00000005433
GSN	19	8416826..8429310	115.702	0.454628	1.37043	0.146365	0.999966	1	ENSMGAG00000007784
MANEA	2	complement(76351147..76360054)	11.7157	-0.474271	-1.38922	0.14646	0.999966	1	ENSMGAG00000013605
ATP13A5	11	12947389..13012423	0.0929454	-0.884347	-1.84593	0.146508	0.999966	1	ENSMGAG00000007237
gene:ENSMGAG00000000680	29	146658..152347	10.6727	-0.521866	-1.43581	0.146632	0.999966	1	ENSMGAG00000000680
ZMAT4	24	complement(2630862..2678174)	0.777242	1.07975	2.11366	0.146694	0.999966	1	ENSMGAG00000002288
KCTD9	24	827137..835140	13.9187	-0.352408	-1.27669	0.146714	0.999966	1	ENSMGAG00000000831
gene:ENSMGAG00000015595	16	13662416..13663297	3.07067	0.621364	1.53833	0.146761	0.999966	1	ENSMGAG00000015595
ARHGEF17	8	complement(12970876..12980222)	0.291863	0.884789	1.84649	0.146807	0.999966	1	ENSMGAG00000005143
gene:ENSMGAG00000003113	29	complement(4175423..4179371)	0.247942	1.01723	2.02402	0.146844	0.999966	1	ENSMGAG00000003113
TGFB2	2	complement(19403068..19549229)	17.3462	0.529059	1.44299	0.146889	0.999966	1	ENSMGAG00000009386
RSPO2	3	complement(82416982..82419208)	0.939118	1.09268	2.13269	0.146901	0.999966	1	ENSMGAG00000012383
ENOX1	1	complement(175309231..175416178)	4.98142	0.584407	1.49942	0.146955	0.999966	1	ENSMGAG00000014981
TNFSF13B	1	complement(145855391..145867377)	56.5107	0.50623	1.42033	0.147045	0.999966	1	ENSMGAG00000014871
SLC12A8	7	complement(29446277..29487809)	11.151	-0.529639	-1.44357	0.147062	0.999966	1	ENSMGAG00000012137
gene:ENSMGAG00000015061	1	complement(179870595..179872411)	8.61887	0.650092	1.56927	0.147082	0.999966	1	ENSMGAG00000015061
gene:ENSMGAG00000006733	4	complement(23252491..23266261)	6.07664	-0.570506	-1.48504	0.147163	0.999966	1	ENSMGAG00000006733
gene:ENSMGAG00000008858	16	complement(12683286..12684980)	18.0502	0.538215	1.45218	0.147227	0.999966	1	ENSMGAG00000008858
LARP4B	6	complement(10064313..10096262)	43.413	-0.404665	-1.32378	0.147468	0.999966	1	ENSMGAG00000005472
INTS2	21	7790066..7805224	16.8198	-0.428265	-1.34561	0.147583	0.999966	1	ENSMGAG00000007537
gene:ENSMGAG00000010124	7	18814019..18819581	7.51836	-0.642647	-1.56119	0.147592	0.999966	1	ENSMGAG00000010124
MST1	14	2513095..2517031	35.9764	0.443715	1.3601	0.147608	0.999966	1	ENSMGAG00000002999
PJVK	7	15879613..15886584	0.290827	-1.33689	-2.52605	0.147616	0.999966	1	ENSMGAG00000009475
ECE1	23	6890334..6896362	7.42365	-0.539014	-1.45298	0.147795	0.999966	1	ENSMGAG00000007373
MAPRE1	22	11125574..11218156	159.023	-0.387108	-1.30777	0.147849	0.999966	1	ENSMGAG00000007478
RAPGEF5	6	complement(31115713..31234182)	24.5229	-0.402165	-1.32149	0.147967	0.999966	1	ENSMGAG00000010394
gene:ENSMGAG00000016054	17	complement(11641782..11644665)	1.94971	0.763472	1.69757	0.148082	0.999966	1	ENSMGAG00000016054
MAX	5	complement(6287306..6288053)	18.0911	0.518255	1.43222	0.148183	0.999966	1	ENSMGAG00000004785
gene:ENSMGAG00000009769	5	complement(17114307..17119512)	0.297457	0.913846	1.88406	0.148215	0.999966	1	ENSMGAG00000009769
RPS6KA2	2	43781592..43878219	2.61904	-0.528715	-1.44264	0.148381	0.999966	1	ENSMGAG00000012309
PIP4K2A	6	17823365..17875046	38.2152	-0.335603	-1.26191	0.148476	0.999966	1	ENSMGAG00000007228
gene:ENSMGAG00000006186	3	27855039..27971071	8.73975	-0.461713	-1.37718	0.14848	0.999966	1	ENSMGAG00000006186
gene:ENSMGAG00000000635	18	58054..116683	2.95719	0.543136	1.45714	0.148541	0.999966	1	ENSMGAG00000000635
ADAMTS15	26	1743826..1752891	2.57979	0.550241	1.46433	0.14861	0.999966	1	ENSMGAG00000001282
GPR17	11	complement(2114438..2115421)	1.21633	0.780552	1.71779	0.148645	0.999966	1	ENSMGAG00000015621
gene:ENSMGAG00000012256	2	complement(42842068..42848460)	0.0395779	-4.22789	-18.738	0.148673	0.999966	1	ENSMGAG00000012256
RASGRF2	Z	complement(67678332..67773926)	0.0174859	-2.14623	-4.4267	0.148884	0.999966	1	ENSMGAG00000008333
MAOB	1	117159767..117191106	19.2068	-0.441809	-1.35831	0.149026	0.999966	1	ENSMGAG00000014604
PAPD7	3	complement(28730141..28785453)	7.61436	-0.406056	-1.32506	0.149037	0.999966	1	ENSMGAG00000006315
EPB41L3	3	49554795..49617607	48.9412	-0.388553	-1.30908	0.149195	0.999966	1	ENSMGAG00000009404
LITAF	16	895463..898131	51.157	-0.422004	-1.33979	0.149252	0.999966	1	ENSMGAG00000001262
MED22	19	complement(7040297..7045029)	78.8557	-0.372313	-1.29443	0.149536	0.999966	1	ENSMGAG00000006384
RREB1	3	complement(11949969..12012566)	3.66537	-0.452373	-1.36829	0.149547	0.999966	1	ENSMGAG00000003910
gene:ENSMGAG00000003095	30	2220772..2223494	0.327055	1.13909	2.20243	0.14958	0.999966	1	ENSMGAG00000003095
CRYGN	6	complement(5842209..5951969)	1.14631	0.798322	1.73908	0.149611	0.999966	1	ENSMGAG00000004552
gene:ENSMGAG00000017295	GL426447.1	complement(14290..16915)	0.0333882	2.65835	6.31309	0.149618	0.999966	1	ENSMGAG00000017295
CADM2	1	complement(98378267..98434089)	0.141883	2.01176	4.03274	0.149622	0.999966	1	ENSMGAG00000014464
gene:ENSMGAG00000003976	16	4522838..4524055	1.91071	-0.72759	-1.65587	0.149645	0.999966	1	ENSMGAG00000003976
GCAT	1	50257823..50267693	33.0004	0.45613	1.37186	0.149712	0.999966	1	ENSMGAG00000012468
GRM3	1	7286896..7332969	0.0883125	1.22839	2.34306	0.149725	0.999966	1	ENSMGAG00000005189
MPZL3	26	complement(5770578..5776550)	29.9265	-0.44905	-1.36514	0.149831	0.999966	1	ENSMGAG00000003965
RNF144B	3	complement(7448854..7480421)	1.49207	0.72617	1.65424	0.149883	0.999966	1	ENSMGAG00000002605
gene:ENSMGAG00000006342	17	7209838..7230593	2.83007	0.78994	1.729	0.149902	0.999966	1	ENSMGAG00000006342
GRHL2	3	79449091..79498207	0.0146929	-4.10504	-17.2084	0.150062	0.999966	1	ENSMGAG00000012259
gene:ENSMGAG00000002131	21	715654..719793	2.17509	0.611182	1.52751	0.150143	0.999966	1	ENSMGAG00000002131
GTSE1	1	15697311..15707816	19.6534	-0.489225	-1.40369	0.150153	0.999966	1	ENSMGAG00000007521
gene:ENSMGAG00000013806	1	69497878..69500401	0.131626	2.06923	4.19662	0.150214	0.999966	1	ENSMGAG00000013806
RPS6KA1	GL428891.1	42981..65045	33.63	-0.411748	-1.3303	0.150235	0.999966	1	ENSMGAG00000009480
CASQ2	1	84188871..84218952	0.0468378	1.87426	3.66613	0.150293	0.999966	1	ENSMGAG00000014302
gene:ENSMGAG00000013820	5	61727922..61735791	3.36385	-0.635751	-1.55375	0.150354	0.999966	1	ENSMGAG00000013820
gene:ENSMGAG00000002380	26	4324896..4327566	0.574273	1.20779	2.30984	0.15038	0.999966	1	ENSMGAG00000002380
FBLN2	14	5972262..6043382	10.8683	0.548185	1.46225	0.15047	0.999966	1	ENSMGAG00000005381
gene:ENSMGAG00000002624	9	complement(2467542..2469416)	0.0721805	1.91815	3.77939	0.150534	0.999966	1	ENSMGAG00000002624
GTF2H5	2	53324327..53328169	44.2426	0.384171	1.30511	0.150734	0.999966	1	ENSMGAG00000012863
gene:ENSMGAG00000012650	5	39373410..39382372	1.97925	0.585237	1.50029	0.150794	0.999966	1	ENSMGAG00000012650
gene:ENSMGAG00000001580	25	complement(1885293..1932477)	0.078497	-1.97932	-3.94307	0.150821	0.999966	1	ENSMGAG00000001580
PHYHD1	19	5490635..5505010	0.744437	0.799671	1.7407	0.150855	0.999966	1	ENSMGAG00000004680
PTPRG	14	13447766..13743695	9.30342	-0.390716	-1.31104	0.150967	0.999966	1	ENSMGAG00000008850
DNAI1	Z	7984052..8078192	0.636379	0.772139	1.7078	0.150976	0.999966	1	ENSMGAG00000002020
gene:ENSMGAG00000008800	GL428201.1	2691..6069	6.86426	-0.574044	-1.48869	0.15104	0.999966	1	ENSMGAG00000008800
ANKRD27	13	complement(9746601..9785231)	2.16047	-0.521393	-1.43534	0.151272	0.999966	1	ENSMGAG00000005555
TOX3	13	5107862..5133280	8.0574	-0.542105	-1.4561	0.151326	0.999966	1	ENSMGAG00000004689
gene:ENSMGAG00000009713	GL424516.1	complement(26522..29728)	82.7727	0.373855	1.29581	0.151401	0.999966	1	ENSMGAG00000009713
PLK1	16	7198644..7202727	61.6144	-0.422965	-1.34068	0.151533	0.999966	1	ENSMGAG00000006510
gene:ENSMGAG00000017027	Z	55610654..55679028	0.244099	-1.09794	-2.14049	0.15164	0.999966	1	ENSMGAG00000017027
MYL2	17	complement(6254295..6257269)	0.307765	-1.19652	-2.29186	0.151791	0.999966	1	ENSMGAG00000005114
CAV1	1	complement(25751004..25767085)	3.64003	0.703188	1.6281	0.15186	0.999966	1	ENSMGAG00000008967
gene:ENSMGAG00000006515	GL425804.1	complement(254..1020)	0.0567938	2.33702	5.05259	0.152069	0.999966	1	ENSMGAG00000006515
gene:ENSMGAG00000016922	1	complement(190095529..190116025)	1.12287	0.591652	1.50697	0.152144	0.999966	1	ENSMGAG00000016922
gene:ENSMGAG00000000821	24	complement(819083..826011)	1.3151	-0.616029	-1.53265	0.152174	0.999966	1	ENSMGAG00000000821
TVP23A	16	9428267..9434230	8.90694	0.41203	1.33056	0.152291	0.999966	1	ENSMGAG00000008374
CHAC2	2	complement(3054661..3057128)	1.69634	-0.797883	-1.73855	0.152313	0.999966	1	ENSMGAG00000002663
TXNRD1	1	complement(55613399..55639068)	33.7128	-0.412812	-1.33128	0.152318	0.999966	1	ENSMGAG00000012955
ANO5	5	complement(3655631..3685997)	5.13883	-0.454971	-1.37075	0.152534	0.999966	1	ENSMGAG00000002054
PQLC2	23	4832810..4836401	13.097	-0.416493	-1.33468	0.152658	0.999966	1	ENSMGAG00000005405
gene:ENSMGAG00000001078	Z	complement(408144..496940)	0.873873	-0.768106	-1.70303	0.152667	0.999966	1	ENSMGAG00000001078
gene:ENSMGAG00000006745	4	23980284..24014797	2.90608	-0.813468	-1.75743	0.152679	0.999966	1	ENSMGAG00000006745
GFRA1	8	complement(31318989..31468753)	2.98094	0.761291	1.69501	0.153031	0.999966	1	ENSMGAG00000011152
ZFAND4	8	complement(19905655..19925635)	25.7466	-0.421245	-1.33908	0.153109	0.999966	1	ENSMGAG00000007500
gene:ENSMGAG00000001291	25	complement(1614584..1621258)	3.90459	0.507152	1.42124	0.15312	0.999966	1	ENSMGAG00000001291
ST6GALNAC4	19	4987845..4989652	43.2123	0.387977	1.30856	0.153166	0.999966	1	ENSMGAG00000003621
CORO2A	Z	complement(74607645..74619439)	33.2751	-0.462469	-1.3779	0.153273	0.999966	1	ENSMGAG00000009023
SEMA4D	Z	complement(46115227..46137601)	1.90863	-0.554163	-1.46832	0.153308	0.999966	1	ENSMGAG00000006614
gene:ENSMGAG00000007322	GL426261.1	1..300	14.8299	0.578349	1.49314	0.153413	0.999966	1	ENSMGAG00000007322
PRKCH	5	complement(56379005..56487206)	22.9137	-0.392631	-1.31279	0.153456	0.999966	1	ENSMGAG00000013557
BCL2	3	15298380..15382645	0.679885	1.13756	2.20008	0.153488	0.999966	1	ENSMGAG00000004792
SLC45A3	28	complement(2196506..2202319)	12.7324	-0.507384	-1.42147	0.153508	0.999966	1	ENSMGAG00000003015
GEMIN5	15	11548428..11563965	14.4606	-0.358718	-1.28229	0.153532	0.999966	1	ENSMGAG00000005618
GPR107	19	5954654..5985143	45.9634	-0.343839	-1.26913	0.153562	0.999966	1	ENSMGAG00000005222
gene:ENSMGAG00000001268	24	1166509..1168846	0.339875	0.991752	1.9886	0.153637	0.999966	1	ENSMGAG00000001268
gene:ENSMGAG00000002290	29	complement(2732023..2736424)	22.2769	0.393965	1.314	0.153731	0.999966	1	ENSMGAG00000002290
DPYSL3	15	complement(17928000..17943913)	11.4806	0.48694	1.40147	0.153816	0.999966	1	ENSMGAG00000009560
NIM1K	Z	14592149..14602017	0.692456	0.794086	1.73398	0.153857	0.999966	1	ENSMGAG00000003599
gene:ENSMGAG00000005813	Z	18266316..18275091	0.318718	1.11004	2.15851	0.154034	0.999966	1	ENSMGAG00000005813
ZNF318	2	31464487..31481539	3.56769	-0.464281	-1.37963	0.154073	0.999966	1	ENSMGAG00000011056
ATP11C	9	complement(4633363..4664774)	9.40841	-0.441347	-1.35787	0.154119	0.999966	1	ENSMGAG00000003966
MAFK	16	2674189..2676130	27.9064	0.450354	1.36638	0.154125	0.999966	1	ENSMGAG00000002646
gene:ENSMGAG00000007634	Z	complement(33202883..33326222)	38.9587	0.50985	1.4239	0.154267	0.999966	1	ENSMGAG00000007634
CLCN5	9	9319781..9342481	18.8936	-0.439551	-1.35618	0.154298	0.999966	1	ENSMGAG00000004934
SERPINA10	5	complement(47676488..47685481)	0.066046	1.9704	3.91877	0.154412	0.999966	1	ENSMGAG00000013185
TERT	3	complement(34946023..34986062)	0.604544	0.628438	1.54589	0.154497	0.999966	1	ENSMGAG00000007076
TFIP11	17	7448247..7456292	15.4418	-0.350412	-1.27492	0.154681	0.999966	1	ENSMGAG00000006881
DNA2	8	complement(11866259..11979843)	10.0263	-0.49263	-1.40701	0.154827	0.999966	1	ENSMGAG00000004097
gene:ENSMGAG00000011960	5	29928212..29933479	189.403	-0.439824	-1.35644	0.154908	0.999966	1	ENSMGAG00000011960
LIX1L	GL427047.1	complement(720..1644)	29.1591	0.500228	1.41444	0.154921	0.999966	1	ENSMGAG00000007801
YME1L1	6	complement(16072488..16089726)	51.7608	-0.33264	-1.25932	0.155105	0.999966	1	ENSMGAG00000006697
GJA8	1	97118643..97121827	0.0291154	3.65348	12.5836	0.155172	0.999966	1	ENSMGAG00000014455
TBX22	9	1460808..1465491	0.0429672	-2.13901	-4.4046	0.155267	0.999966	1	ENSMGAG00000001700
FGF7	12	10409540..10442589	0.0157516	3.65348	12.5836	0.155381	0.999966	1	ENSMGAG00000007239
gene:ENSMGAG00000013375	2	65905905..65914292	0.0159004	3.65348	12.5836	0.155443	0.999966	1	ENSMGAG00000013375
TNFRSF11B	3	complement(86978195..86990168)	38.4274	0.498886	1.41312	0.155467	0.999966	1	ENSMGAG00000012502
MAPKBP1	5	25835872..25895611	2.10012	-0.472797	-1.3878	0.155474	0.999966	1	ENSMGAG00000011295
KCNJ1	26	complement(1127505..1128819)	0.0186656	3.65348	12.5836	0.155507	0.999966	1	ENSMGAG00000015680
MYBPC1	1	complement(56673655..56834187)	0.0119064	-2.65323	-6.29076	0.155542	0.999966	1	ENSMGAG00000013091
gene:ENSMGAG00000017287	29	2778523..2860961	0.0324367	3.65348	12.5836	0.155551	0.999966	1	ENSMGAG00000017287
ERI3	10	complement(21295423..21358404)	16.8944	0.468081	1.38327	0.155655	0.999966	1	ENSMGAG00000010051
gene:ENSMGAG00000016617	4	61613452..61619997	0.0634632	3.65348	12.5836	0.155705	0.999966	1	ENSMGAG00000016617
ASZ1	1	25346322..25385218	0.246547	1.03641	2.05112	0.15573	0.999966	1	ENSMGAG00000008859
HS3ST2	16	complement(7327934..7328580)	0.304697	1.30997	2.47936	0.15574	0.999966	1	ENSMGAG00000006773
TMPRSS12	GL429722.1	complement(275852..278920)	0.0256079	3.65348	12.5836	0.15586	0.999966	1	ENSMGAG00000010659
ZNF668	GL424939.1	complement(1185..3962)	0.0670771	-2.1578	-4.46233	0.156206	0.999966	1	ENSMGAG00000004509
STIL	10	complement(22813832..22830155)	1.90158	-0.537079	-1.45103	0.156352	0.999966	1	ENSMGAG00000010795
gene:ENSMGAG00000004107	26	5830541..5834397	0.506392	0.868608	1.8259	0.156401	0.999966	1	ENSMGAG00000004107
gene:ENSMGAG00000002086	21	645216..836473	1.89583	0.706423	1.63175	0.156442	0.999966	1	ENSMGAG00000002086
SAMD4A	5	58837339..58874599	7.15225	0.485361	1.39994	0.156451	0.999966	1	ENSMGAG00000013686
CDH17	3	complement(76680496..76701025)	0.267467	0.868279	1.82548	0.156501	0.999966	1	ENSMGAG00000012005
HAPLN4	30	2909470..2914455	0.0787249	2.08486	4.24235	0.156547	0.999966	1	ENSMGAG00000004362
HECTD4	17	complement(6531254..6576961)	0.942753	-0.470864	-1.38594	0.156825	0.999966	1	ENSMGAG00000005581
gene:ENSMGAG00000001745	6	553797..570809	148.56	0.454031	1.36986	0.156932	0.999966	1	ENSMGAG00000001745
gene:ENSMGAG00000016726	7	1429648..1430520	0.0350051	-3.89303	-14.8566	0.157127	0.999966	1	ENSMGAG00000016726
GMIP	GL424683.1	complement(108..12158)	0.669117	-0.709655	-1.63541	0.157258	0.999966	1	ENSMGAG00000003694
TDRD1	8	30295545..30312901	2.36521	-0.586341	-1.50143	0.157299	0.999966	1	ENSMGAG00000011067
gene:ENSMGAG00000017262	1	complement(198439695..198446133)	49.6816	-0.425672	-1.3432	0.157576	0.999966	1	ENSMGAG00000017262
PTGS1	19	8658026..8661901	16.4915	0.421707	1.33951	0.157744	0.999966	1	ENSMGAG00000007938
PLP1	4	31532316..31535710	0.176718	1.54635	2.92078	0.157776	0.999966	1	ENSMGAG00000009552
NOLC1	8	complement(16704159..16713510)	25.4761	-0.385991	-1.30676	0.157873	0.999966	1	ENSMGAG00000007197
EDARADD	2	complement(38476369..38488145)	9.99964	-0.494315	-1.40865	0.157918	0.999966	1	ENSMGAG00000011809
PELI1	2	7840724..7858615	23.1142	-0.384612	-1.30551	0.157941	0.999966	1	ENSMGAG00000004754
FOXI1	15	complement(3396633..3398722)	0.0593358	-2.22856	-4.68666	0.158066	0.999966	1	ENSMGAG00000002015
gene:ENSMGAG00000017065	29	complement(4366917..4370054)	222.588	0.502578	1.41674	0.158076	0.999966	1	ENSMGAG00000017065
A2ML1	1	79614577..79639918	0.00750331	-3.95633	-15.523	0.158141	0.999966	1	ENSMGAG00000013947
TERB2	12	618001..620651	0.0688943	2.03313	4.09292	0.158183	0.999966	1	ENSMGAG00000001350
CACFD1	19	7132435..7139001	10.0082	-0.513257	-1.42727	0.158316	0.999966	1	ENSMGAG00000006584
gene:ENSMGAG00000012102	6	complement(49075041..49079515)	0.149859	1.2283	2.34291	0.158382	0.999966	1	ENSMGAG00000012102
ZDHHC12	19	complement(5407467..5410901)	11.9909	-0.457197	-1.37287	0.158413	0.999966	1	ENSMGAG00000004548
USP4	14	2811401..2840653	15.8068	-0.35848	-1.28207	0.158442	0.999966	1	ENSMGAG00000002305
gene:ENSMGAG00000003945	GL424738.1	complement(1333..1839)	11.3232	0.58303	1.49799	0.158444	0.999966	1	ENSMGAG00000003945
BCL9	1	97003000..97013303	4.71113	-0.464292	-1.37964	0.158486	0.999966	1	ENSMGAG00000014451
BUB1	2	3113419..3131384	8.02802	-0.469279	-1.38442	0.158717	0.999966	1	ENSMGAG00000002837
PTPRK	2	60709855..60972664	4.0113	-0.418021	-1.33609	0.158788	0.999966	1	ENSMGAG00000013225
gene:ENSMGAG00000011252	8	31857939..31875002	0.133003	1.17716	2.26131	0.158928	0.999966	1	ENSMGAG00000011252
gene:ENSMGAG00000002850	30	complement(2089818..2092039)	73.5995	0.395323	1.31524	0.158955	0.999966	1	ENSMGAG00000002850
SCRN1	6	complement(34360143..34385704)	46.9018	-0.401074	-1.32049	0.15901	0.999966	1	ENSMGAG00000010774
FAM83D	22	3748418..3751275	28.9674	-0.461601	-1.37707	0.159025	0.999966	1	ENSMGAG00000003153
STAR	24	complement(2363517..2366277)	206.98	0.37145	1.29365	0.15906	0.999966	1	ENSMGAG00000002130
MAPK1	17	543546..553437	156.736	-0.315882	-1.24477	0.159173	0.999966	1	ENSMGAG00000001061
gene:ENSMGAG00000017049	6	complement(1488722..1492946)	0.0475021	-3.893	-14.8562	0.159181	0.999966	1	ENSMGAG00000017049
gene:ENSMGAG00000017350	5	10416599..10419238	0.048655	-3.893	-14.8562	0.159201	0.999966	1	ENSMGAG00000017350
gene:ENSMGAG00000009320	20	10758656..10761578	4.46966	0.533566	1.4475	0.159338	0.999966	1	ENSMGAG00000009320
SVOPL	1	57454904..57472474	0.154019	-1.21649	-2.32381	0.159433	0.999966	1	ENSMGAG00000013146
SLC27A1	GL424683.1	26196..36021	4.08396	0.497246	1.41152	0.15949	0.999966	1	ENSMGAG00000003737
MKNK1	10	complement(22689802..22703949)	13.2711	-0.463835	-1.3792	0.159493	0.999966	1	ENSMGAG00000010722
ATG13	5	complement(24192645..24206356)	19.1728	-0.415896	-1.33413	0.159613	0.999966	1	ENSMGAG00000010974
MFSD9	1	complement(141210419..141216166)	6.72945	-0.469192	-1.38433	0.159633	0.999966	1	ENSMGAG00000014814
ROBO1	1	101247364..101511971	6.29409	-0.402296	-1.32161	0.159853	0.999966	1	ENSMGAG00000014468
ARL2BP	13	complement(2244400..2249374)	14.2052	-0.518334	-1.4323	0.159857	0.999966	1	ENSMGAG00000002773
gene:ENSMGAG00000009035	11	15953017..15955096	0.693426	0.815476	1.75988	0.159869	0.999966	1	ENSMGAG00000009035
CREM	6	complement(12962494..12986343)	100.234	0.434126	1.35109	0.159893	0.999966	1	ENSMGAG00000005858
C2orf71	2	complement(8969329..8977208)	0.0167948	2.31912	4.99029	0.160021	0.999966	1	ENSMGAG00000005295
CTHRC1	3	80195556..80197862	37.3127	0.484243	1.39885	0.160027	0.999966	1	ENSMGAG00000012358
MCM10	1	complement(8271032..8284387)	13.6862	-0.475908	-1.39079	0.160235	0.999966	1	ENSMGAG00000004763
gene:ENSMGAG00000005150	28	complement(1058820..1067310)	0.0133795	-3.97945	-15.7737	0.160379	0.999966	1	ENSMGAG00000005150
ODF2	19	5279779..5294895	3.02769	-0.506328	-1.42043	0.160451	0.999966	1	ENSMGAG00000004272
TTC7B	5	complement(46066901..46168804)	27.6334	-0.38316	-1.3042	0.160552	0.999966	1	ENSMGAG00000013056
SLC25A48	15	complement(15059400..15069837)	0.68321	-0.940046	-1.91859	0.160562	0.999966	1	ENSMGAG00000008140
BRF1	5	complement(55032078..55078530)	4.95262	0.543875	1.45788	0.160575	0.999966	1	ENSMGAG00000013493
gene:ENSMGAG00000001563	30	complement(1014936..1017830)	0.0189805	-3.97945	-15.7737	0.16061	0.999966	1	ENSMGAG00000001563
PPDPFL	3	58324595..58326610	1.19351	1.08003	2.11408	0.160615	0.999966	1	ENSMGAG00000010818
MRPL55	6	1807341..1810213	77.2329	0.37663	1.29831	0.160704	0.999966	1	ENSMGAG00000002612
SESTD1	7	15399949..15449766	20.4115	0.359038	1.28257	0.160808	0.999966	1	ENSMGAG00000009282
MYH10	20	complement(1809753..1901587)	54.6693	0.417111	1.33525	0.160809	0.999966	1	ENSMGAG00000002469
KRT19	29	complement(4076568..4081119)	212.047	0.391144	1.31143	0.160829	0.999966	1	ENSMGAG00000003084
gene:ENSMGAG00000005564	GL425399.1	173..1294	2.15212	-0.749786	-1.68154	0.160881	0.999966	1	ENSMGAG00000005564
MINDY1	27	complement(718997..719967)	17.9567	0.464843	1.38017	0.160905	0.999966	1	ENSMGAG00000001119
CADPS2	1	23102406..23303164	1.39348	-0.597967	-1.51358	0.160935	0.999966	1	ENSMGAG00000008495
ARHGAP22	8	complement(20463039..20500722)	5.31266	-0.478977	-1.39376	0.160965	0.999966	1	ENSMGAG00000008058
ZP2	16	complement(15874945..15880764)	0.147772	-1.15576	-2.22801	0.16097	0.999966	1	ENSMGAG00000010443
VASN	16	13291166..13293238	54.5357	0.337504	1.26357	0.161012	0.999966	1	ENSMGAG00000009416
gene:ENSMGAG00000005614	2	9869660..9898374	4.69501	-0.401308	-1.3207	0.161012	0.999966	1	ENSMGAG00000005614
TAGLN3	1	92816569..92827148	4.86046	0.597348	1.51293	0.16104	0.999966	1	ENSMGAG00000014399
FAM13C	8	complement(7599229..7646350)	0.0667073	-1.65893	-3.15783	0.161154	0.999966	1	ENSMGAG00000002785
EEF1B2	7	complement(12736542..12740119)	202.943	0.323736	1.25157	0.161165	0.999966	1	ENSMGAG00000008548
ADAMTS8	26	complement(1722215..1727802)	1.6814	-0.576871	-1.49161	0.161182	0.999966	1	ENSMGAG00000001221
PPP2R3B	1	137574491..137621173	11.3891	-0.412992	-1.33144	0.161209	0.999966	1	ENSMGAG00000014749
gene:ENSMGAG00000006320	6	14481837..14482906	8.93012	-0.594664	-1.51012	0.161212	0.999966	1	ENSMGAG00000006320
ST6GALNAC2	20	4284082..4290057	1.06341	0.691394	1.61484	0.161382	0.999966	1	ENSMGAG00000004145
AMFR	13	complement(572545..591339)	76.4083	0.33541	1.26174	0.161633	0.999966	1	ENSMGAG00000000962
RHOU	2	40678167..40681654	8.00752	0.581773	1.49669	0.161736	0.999966	1	ENSMGAG00000012001
GSG1	1	complement(49116572..49123120)	0.138569	1.69018	3.22696	0.161893	0.999966	1	ENSMGAG00000011882
RRP12	8	24590133..24602499	29.2517	-0.4152	-1.33348	0.161975	0.999966	1	ENSMGAG00000009829
gene:ENSMGAG00000002735	1	846081..848511	90.7957	0.360248	1.28365	0.161981	0.999966	1	ENSMGAG00000002735
G6PC	29	4699910..4702555	1.59183	0.686151	1.60898	0.162035	0.999966	1	ENSMGAG00000004239
STARD4	Z	49046921..49049200	3.24073	-0.725965	-1.65401	0.162236	0.999966	1	ENSMGAG00000008766
ARID5B	8	15070301..15208319	9.82839	0.481474	1.39617	0.162292	0.999966	1	ENSMGAG00000003626
VIRMA	3	complement(76849159..76874149)	1.32704	-0.521253	-1.4352	0.162303	0.999966	1	ENSMGAG00000012036
ATP13A3	11	12733680..12764786	3.97396	-0.437293	-1.35406	0.162342	0.999966	1	ENSMGAG00000007079
TMEM45B	26	1480247..1483791	0.032616	-4.06202	-16.7028	0.162354	0.999966	1	ENSMGAG00000001026
gene:ENSMGAG00000001793	21	374891..386188	0.0129	-4.06202	-16.7028	0.162523	0.999966	1	ENSMGAG00000001793
gene:ENSMGAG00000016165	8	complement(5236121..5237665)	0.464493	0.807174	1.74978	0.162529	0.999966	1	ENSMGAG00000016165
gene:ENSMGAG00000009246	GL428536.1	complement(376..1194)	0.277141	1.22862	2.34342	0.162643	0.999966	1	ENSMGAG00000009246
gene:ENSMGAG00000016537	GL427232.1	complement(2..1005)	0.235336	-1.62258	-3.07926	0.162793	0.999966	1	ENSMGAG00000016537
GMCL1	GL429737.1	complement(85550..91727)	11.2237	0.445958	1.36222	0.162879	0.999966	1	ENSMGAG00000010852
gene:ENSMGAG00000011770	8	36182185..36243177	1.77721	-0.56582	-1.48023	0.162945	0.999966	1	ENSMGAG00000011770
SPI1	5	23642696..23662311	27.8073	-0.566409	-1.48083	0.163014	0.999966	1	ENSMGAG00000010682
KIAA0355	13	complement(10838838..10862490)	3.76034	-0.469656	-1.38478	0.163139	0.999966	1	ENSMGAG00000006036
gene:ENSMGAG00000009746	3	complement(2031062..2032149)	31.0804	-0.583085	-1.49805	0.163247	0.999966	1	ENSMGAG00000009746
RGS14	15	9714973..9718496	8.24191	0.520085	1.43404	0.16343	0.999966	1	ENSMGAG00000004198
UBXN2A	2	109538930..109552176	29.0413	-0.367103	-1.28976	0.163433	0.999966	1	ENSMGAG00000014053
DGKG	11	complement(4646955..4660953)	1.30058	0.58587	1.50094	0.163508	0.999966	1	ENSMGAG00000003486
gene:ENSMGAG00000011590	10	complement(27627938..27697736)	24.9059	-0.409971	-1.32866	0.163522	0.999966	1	ENSMGAG00000011590
TMPRSS6	1	complement(49893747..49908799)	0.0301889	-2.11284	-4.32542	0.163564	0.999966	1	ENSMGAG00000012637
RBP4	8	22591210..22596105	0.183202	-1.29396	-2.452	0.163581	0.999966	1	ENSMGAG00000008841
HTR2C	9	2205163..2277727	0.304428	0.963599	1.95017	0.163583	0.999966	1	ENSMGAG00000002527
SEC24C	8	complement(18627467..18653801)	86.3912	-0.404212	-1.32337	0.163637	0.999966	1	ENSMGAG00000006518
[truncated: 12,124 more rows]
